# Supplementary material for: Exploring the use of rigid 18-membered macrocycles with amide pendant arms for Pb(ii)-based radiopharmaceuticals
Source: Royal Society of Chemistry journal article supplement (doi:10.1039/d3qi02354k), 2023-12-28
Supplement: d3qi02354k1.pdf [file d3qi02354k1.pdf]

## Exploring the use of rigid 18-membered macrocycles with amide pendant arms for Pb(II)-based radiopharmaceuticals

Charlene Harriswangler,<sup>a</sup> Brooke L. McNeil,<sup>b,c</sup> Isabel Brandariz-Lendoiro,<sup>a</sup> Fátima Lucio-Martínez,<sup>a</sup> Laura Valencia,<sup>d</sup> David Esteban-Gómez,<sup>a</sup> Caterina F. Ramogida,<sup>\*b,c</sup> and Carlos Platas-Iglesias<sup>\*a</sup>

- <sup>a</sup> Universidade da Coruña, Centro Interdisciplinar de Química e Bioloxía (CICA) and Departamento de Química, Facultade de Ciencias, 15071, A Coruña, Galicia, Spain. E-mail: [carlos.platas.iglesias@udc.es](mailto:carlos.platas.iglesias@udc.es)
- <sup>b</sup> Department of Chemistry, Simon Fraser University, Burnaby, BC, Canada.
- <sup>c</sup> Life Sciences Division, TRIUMF, Vancouver, BC, Canada
- <sup>d</sup> Departamento de Química Inorgánica, Facultad de Ciencias, Universidade de Vigo, As Lagoas, Marcosende, 36310 Pontevedra, Spain

## Contents

|                                                                                                                                                                                                                                                                                                                                                                                                                                                                                                                                                                                                                                                                                                                                                                                                                  |    |
|------------------------------------------------------------------------------------------------------------------------------------------------------------------------------------------------------------------------------------------------------------------------------------------------------------------------------------------------------------------------------------------------------------------------------------------------------------------------------------------------------------------------------------------------------------------------------------------------------------------------------------------------------------------------------------------------------------------------------------------------------------------------------------------------------------------|----|
| <b>Figure S1:</b> ORTEP views (50%) of the cations present in the crystal structure of <b>[Pb(PYTAM)](PF<sub>6</sub>)<sub>2</sub></b> ...                                                                                                                                                                                                                                                                                                                                                                                                                                                                                                                                                                                                                                                                        | 5  |
| <b>Figure S2:</b> ORTEP views (50%) of the cations present in the crystal structure of <b>[Pb(H<sub>4</sub>PYTAMGly)](NO<sub>3</sub>)<sub>2</sub>·5H<sub>2</sub>O</b> .....                                                                                                                                                                                                                                                                                                                                                                                                                                                                                                                                                                                                                                      | 5  |
| <b>Table S1:</b> Natural bond orbital analysis of the Pb 6s <sup>2</sup> lone pair.....                                                                                                                                                                                                                                                                                                                                                                                                                                                                                                                                                                                                                                                                                                                          | 5  |
| <b>Figure S3:</b> Conformations of the five-membered chelate rings formed upon coordination of the ligand ethylenediamino units.....                                                                                                                                                                                                                                                                                                                                                                                                                                                                                                                                                                                                                                                                             | 6  |
| <b>Figure S4:</b> <sup>1</sup> H NMR spectra of [Pb(PYTAM)] <sup>2+</sup> (pD = 1.3), [Pb(CHX-PYTAM)] <sup>2+</sup> (pD = 1.5), [Pb(PYTAMGly)] <sup>2+</sup> (pD = 1.1), [Pb(CHX-PYTAMGly)] <sup>2+</sup> (pD = 1.6) recorded in D <sub>2</sub> O solution (300 MHz, 298 K).....                                                                                                                                                                                                                                                                                                                                                                                                                                                                                                                                 | 6  |
| <b>Figure S5:</b> Comparison of the <sup>1</sup> H NMR spectra of CHX-PYTAMGly and [Pb(CHX-PYTAMGly)] <sup>2+</sup> at different pD values.....                                                                                                                                                                                                                                                                                                                                                                                                                                                                                                                                                                                                                                                                  | 7  |
| <b>Table S2:</b> <sup>1</sup> H-NMR chemical shifts (ppm) for the Pb(II) complexes of PYTAM, CHX-PYTAM, PYTAMGly <sup>4-</sup> and CHX-PYTAMGly <sup>4-</sup> (500 MHz, 298 K, D <sub>2</sub> O).....                                                                                                                                                                                                                                                                                                                                                                                                                                                                                                                                                                                                            | 7  |
| <b>Table S3:</b> <sup>13</sup> C-NMR chemical shifts (ppm) for the Pb(II) complexes of PYTAM, CHX-PYTAM, PYTAMGly <sup>4-</sup> and CHX-PYTAMGly <sup>4-</sup> (126 MHz, 298 K, D <sub>2</sub> O).....                                                                                                                                                                                                                                                                                                                                                                                                                                                                                                                                                                                                           | 8  |
| <b>Table S4:</b> <i>J</i> coupling values (Hz) for the Pb(II) complexes of PYTAM, CHX-PYTAM, PYTAMGly <sup>4-</sup> and CHX-PYTAMGly <sup>4-</sup> .....                                                                                                                                                                                                                                                                                                                                                                                                                                                                                                                                                                                                                                                         | 8  |
| <b>Figure S6:</b> (a) UV-Vis absorption spectra recorded for a solution of CHX-PYTAMGly <sup>4-</sup> (10 <sup>-4</sup> M, <i>I</i> = 0.15 M NaClO <sub>4</sub> , 25 °C) at different pH values. The spectra highlighted in red, violet and blue correspond to pH values of 1.30, 5.57 and 8.01, respectively. The inset shows the spectral changes at selected wavelengths and the fits of the data. (b) UV-Vis absorption spectra recorded to monitor the dissociation of the pre-formed Pb(II) complex with CHX-PYTAMGly <sup>4-</sup> (10 <sup>-4</sup> M, <i>I</i> = 0.15 M NaClO <sub>4</sub> , 25 °C) at different pH values. The spectra highlighted in red and blue correspond to pH values of 1.05 and 2.69, respectively. The inset shows the spectral changes at 240 nm and the fit of the data..... | 8  |
| <b>Figure S7:</b> Speciation diagrams for the protonation of PYTAMGly <sup>4-</sup> and CHX-PYTAMGly <sup>4-</sup> [ <i>L</i> ] <sub>tot</sub> = 1 mM (25 °C, <i>I</i> = 0.15 M NaClO <sub>4</sub> ).....                                                                                                                                                                                                                                                                                                                                                                                                                                                                                                                                                                                                        | 9  |
| <b>Table S5:</b> Radiochemical yields (RCYs) for the [ <sup>203</sup> Pb]Pb(II) radiolabelling reactions after 60 minutes (n=3), room temperature.....                                                                                                                                                                                                                                                                                                                                                                                                                                                                                                                                                                                                                                                           | 9  |
| <b>Table S6:</b> Radiochemical yields (RCYs) for the [ <sup>203</sup> Pb]Pb(II) radiolabelling reactions after 60 minutes (n=3), 80 °C.....                                                                                                                                                                                                                                                                                                                                                                                                                                                                                                                                                                                                                                                                      | 9  |
| <b>Table S7:</b> Radiochemical yields (RCYs) for the [ <sup>203</sup> Pb]Pb(II) radiolabelling reactions after 30 minutes (n=3), room temperature.....                                                                                                                                                                                                                                                                                                                                                                                                                                                                                                                                                                                                                                                           | 9  |
| <b>Table S8:</b> Radiochemical yields (RCYs) for the [ <sup>203</sup> Pb]Pb(II) radiolabelling reactions after 30 minutes (n=3), 80 °C.....                                                                                                                                                                                                                                                                                                                                                                                                                                                                                                                                                                                                                                                                      | 9  |
| <b>Figure S8:</b> Radiolabelling studies using <sup>203</sup> Pb (~150 kBq, 0.1 M NH <sub>4</sub> OAc buffer, pH=7.4). (a) Concentration dependent radiolabelling at room temperature after 30 min. (b) Concentration dependent radiolabelling at 80 °C after 30 min.....                                                                                                                                                                                                                                                                                                                                                                                                                                                                                                                                        | 10 |
| <b>Table S9:</b> Radiochemical yields (RCYs) for the [ <sup>203</sup> Pb]Pb(II) radiolabelling of CHX-PYTAM at 37 °C. 10                                                                                                                                                                                                                                                                                                                                                                                                                                                                                                                                                                                                                                                                                         |    |
| <b>Table S10:</b> In vitro stability of the <sup>203</sup> Pb-labeled chelators at 37 °C in human serum (n=3). ....                                                                                                                                                                                                                                                                                                                                                                                                                                                                                                                                                                                                                                                                                              | 10 |
| <b>Table S11:</b> Stability of the <sup>203</sup> Pb-labeled chelators prepared at 80 °C in a 20-fold excess EDTA (n=3)....                                                                                                                                                                                                                                                                                                                                                                                                                                                                                                                                                                                                                                                                                      | 10 |
| <b>Table S12:</b> Stability of the <sup>203</sup> Pb-labeled chelators prepared at room temperature in a 20-fold excess EDTA (n=3).....                                                                                                                                                                                                                                                                                                                                                                                                                                                                                                                                                                                                                                                                          | 10 |
| <b>Table S13:</b> Stability of the <sup>203</sup> Pb-labeled chelators prepared at 80 °C in a 20-fold excess Pb(II)(n=3).....                                                                                                                                                                                                                                                                                                                                                                                                                                                                                                                                                                                                                                                                                    | 11 |
| <b>Table S14:</b> Stability of the <sup>203</sup> Pb-labeled chelators prepared at room temperature in a 20-fold excess Pb(II) (n=3).....                                                                                                                                                                                                                                                                                                                                                                                                                                                                                                                                                                                                                                                                        | 11 |

|                                                                                                                                                                                                          |    |
|----------------------------------------------------------------------------------------------------------------------------------------------------------------------------------------------------------|----|
| <b>Figure S9</b> Challenging studies of the $^{203}\text{Pb}$ -labelled complexes prepared at room temperature. (a) Excess EDTA challenge (20 equiv.). (b) Excess cold Pb(II) challenge (20 equiv.)..... | 11 |
| <b>Figure S10:</b> Negative control showing no radiolabelling with $^{203}\text{Pb}$ ]Pb(II).....                                                                                                        | 12 |
| <b>Figure S11:</b> Example of iTLC showing quantitative radiolabelling of PYTAM with $^{203}\text{Pb}$ ]Pb(II). .....                                                                                    | 12 |
| <b>Figure S12:</b> Example of iTLC showing quantitative radiolabelling of <i>CHX</i> -PYTAM with $^{203}\text{Pb}$ ]Pb(II). 12                                                                           |    |
| <b>Figure S13:</b> Example of iTLC showing quantitative radiolabelling of $\text{H}_4$ PYTAMGly with $^{203}\text{Pb}$ ]Pb(II). .....                                                                    | 13 |
| <b>Figure S14:</b> Example of iTLC showing quantitative radiolabelling of $\text{H}_4$ <i>CHX</i> -PYTAMGly with $^{203}\text{Pb}$ ]Pb(II). .....                                                        | 13 |
| <b>Figure S15:</b> Example of iTLC showing ~75% radiolabelling of <i>CHX</i> -PYTAM with $^{203}\text{Pb}$ ]Pb(II). .....                                                                                | 13 |
| <b>Figure S16:</b> Example of iTLC showing ~45% radiolabelling of PYTAM with $^{203}\text{Pb}$ ]Pb(II). .....                                                                                            | 14 |
| <b>Table S15:</b> MPLC purification method A .....                                                                                                                                                       | 14 |
| <b>Table S16:</b> MPLC purification method B .....                                                                                                                                                       | 14 |
| <b>Table S17:</b> MPLC purification method C .....                                                                                                                                                       | 14 |
| <b>Table S18:</b> HPLC conditions for the purification of the chelators (A = $\text{H}_2\text{O}+0.1\%\text{TFA}$ , B = $\text{CH}_3\text{CN}+0.1\%\text{TFA}$ ) .....                                   | 15 |
| <b>Scheme S1:</b> Synthesis of $\text{H}_4$ PYTAMGly. ....                                                                                                                                               | 16 |
| <b>Figure S17:</b> $^1\text{H}$ NMR spectrum of compound $\text{H}_4$ PYTAMGly (300 MHz, $\text{D}_2\text{O}$ , pD= 2.00, 298 K). .....                                                                  | 16 |
| <b>Figure S18:</b> $^{13}\text{C}$ NMR spectrum of compound $\text{H}_4$ PYTAMGly. (75 MHz, $\text{D}_2\text{O}$ , pD= 2.00, 298 K). .....                                                               | 17 |
| <b>Figure S19:</b> Experimental high resolution mass spectrum (ESI $^+$ ) of compound $\text{H}_4$ PYTAMGly. ....                                                                                        | 17 |
| <b>Scheme S2:</b> Synthesis of <i>CHX</i> -PYAN. ....                                                                                                                                                    | 18 |
| <b>Figure S20:</b> $^1\text{H}$ NMR spectrum of <i>CHX</i> -PYAN (500 MHz, $\text{CDCl}_3$ , 298 K).....                                                                                                 | 18 |
| <b>Figure S21:</b> $^{13}\text{C}$ NMR spectrum of <i>CHX</i> -PYAN (126 MHz, $\text{CDCl}_3$ , 298 K).....                                                                                              | 19 |
| <b>Figure S22:</b> Experimental high resolution mass spectrum (ESI $^+$ ) of <i>CHX</i> -PYAN.....                                                                                                       | 19 |
| <b>Scheme S3:</b> Synthesis of <i>CHX</i> -PYTAM.....                                                                                                                                                    | 20 |
| <b>Figure S23:</b> $^1\text{H}$ NMR spectrum of compound <i>CHX</i> -PYTAM (400 MHz, $\text{D}_2\text{O}$ , pD= 1.74, 343.15 K). ....                                                                    | 20 |
| <b>Figure S24:</b> $^{13}\text{C}$ NMR spectrum of compound <i>CHX</i> -PYTAM (101 MHz, $\text{D}_2\text{O}$ , pD= 1.74, 343.15 K). ....                                                                 | 21 |
| <b>Figure S25:</b> Experimental high resolution mass spectrum (ESI $^+$ ) of compound <i>CHX</i> -PYTAM.....                                                                                             | 21 |
| <b>Scheme S4:</b> Synthesis of $\text{H}_4$ <i>CHX</i> -PYTAMGly .....                                                                                                                                   | 22 |
| <b>Figure S26:</b> $^1\text{H}$ NMR spectrum of compound $\text{H}_4$ <i>CHX</i> -PYTAMGly (400 MHz, $\text{D}_2\text{O}$ , pD= 9.8, 343.15 K). .....                                                    | 22 |
| <b>Figure S27:</b> $^{13}\text{C}$ NMR spectrum of compound $\text{H}_4$ <i>CHX</i> -PYTAMGly (400 MHz, $\text{D}_2\text{O}$ , pD= 9.8, 343.15 K). .....                                                 | 23 |
| <b>Figure S28:</b> Experimental high resolution mass spectrum (ESI $^+$ ) of compound $\text{H}_4$ <i>CHX</i> -PYTAMGly ....                                                                             | 23 |
| <b>Scheme S5:</b> Structure of $[\text{Pb}(\text{PYTAM})]^{2+}$ .....                                                                                                                                    | 24 |
| <b>Figure S29:</b> $^1\text{H}$ NMR spectrum of complex $[\text{Pb}(\text{PYTAM})]^{2+}$ (500 MHz, $\text{D}_2\text{O}$ , pD= 6.5, 298 K). .....                                                         | 24 |
| <b>Figure S30:</b> $^{13}\text{C}$ NMR spectrum of complex $[\text{Pb}(\text{PYTAM})]^{2+}$ (126 MHz, $\text{D}_2\text{O}$ , pD= 6.5, 298 K). .....                                                      | 25 |
| <b>Figure S31:</b> DEPT spectrum of complex $[\text{Pb}(\text{PYTAM})]^{2+}$ (126 MHz, $\text{D}_2\text{O}$ , pD= 6.5, 298 K).....                                                                       | 25 |
| <b>Figure S32:</b> COSY NMR spectrum of complex $[\text{Pb}(\text{PYTAM})]^{2+}$ (500 MHz, $\text{D}_2\text{O}$ , pD= 6.5, 298 K).....                                                                   | 26 |
| <b>Figure S33:</b> HSQC NMR spectrum of complex $[\text{Pb}(\text{PYTAM})]^{2+}$ ( $\text{D}_2\text{O}$ , pD= 6.5, 298 K).....                                                                           | 26 |
| <b>Figure S34:</b> HMBC NMR spectrum of complex $[\text{Pb}(\text{PYTAM})]^{2+}$ ( $\text{D}_2\text{O}$ , pD= 6.5, 298 K).....                                                                           | 27 |
| <b>Figure S35:</b> Experimental high resolution mass spectrum (ESI $^+$ ) of compound $[\text{Pb}(\text{PYTAM})]^{2+}$ .....                                                                             | 27 |

|                                                                                                                                                                                  |    |
|----------------------------------------------------------------------------------------------------------------------------------------------------------------------------------|----|
| <b>Scheme S6:</b> Structure of $[\text{Pb}(\text{PYTAMGly})]^{2-}$ .....                                                                                                         | 28 |
| <b>Figure S36:</b> $^1\text{H}$ NMR spectrum of complex $[\text{Pb}(\text{PYTAMGly})]^{2-}$ (500 MHz, $\text{D}_2\text{O}$ , pD= 6.8, 298 K).....                                | 28 |
| <b>Figure S37:</b> $^{13}\text{C}$ NMR spectrum of complex $[\text{Pb}(\text{PYTAMGly})]^{2-}$ (126 MHz, $\text{D}_2\text{O}$ , pD= 6.8, 298 K).....                             | 29 |
| <b>Figure S38:</b> DEPT spectrum of complex $[\text{Pb}(\text{PYTAMGly})]^{2-}$ (126 MHz, $\text{D}_2\text{O}$ , pD= 6.8, 298 K). .....                                          | 29 |
| <b>Figure S39:</b> COSY NMR spectrum of complex $[\text{Pb}(\text{PYTAMGly})]^{2-}$ (500 MHz, $\text{D}_2\text{O}$ , pD= 6.8, 298 K).<br>.....                                   | 30 |
| <b>Figure S40:</b> HSQC NMR spectrum of complex $[\text{Pb}(\text{PYTAMGly})]^{2-}$ ( $\text{D}_2\text{O}$ , pD= 6.8, 298 K). .....                                              | 30 |
| <b>Figure S41:</b> HMBC NMR spectrum of complex $[\text{Pb}(\text{PYTAMGly})]^{2-}$ ( $\text{D}_2\text{O}$ , pD= 6.8, 298 K). .....                                              | 31 |
| <b>Figure S42:</b> HMQC NMR $^1\text{H}$ - $^{207}\text{Pb}$ spectrum of complex $[\text{Pb}(\text{PYTAMGly})]^{2-}$ ( $\text{D}_2\text{O}$ , pD= 6.8, 298 K). 31                |    |
| <b>Figure S43:</b> Experimental high resolution mass spectrum (ESI $^-$ ) of compound $[\text{Pb}(\text{HPYTAMGly})]^-$ .....                                                    | 32 |
| <b>Scheme S7:</b> Structure of $[\text{Pb}(\text{CHX-PYTAM})]^{2+}$ .....                                                                                                        | 33 |
| <b>Figure S44:</b> $^1\text{H}$ NMR spectrum of complex $[\text{Pb}(\text{CHX-PYTAM})]^{2+}$ (500 MHz, $\text{D}_2\text{O}$ , pD= 7.4, 298 K). .33                               |    |
| <b>Figure S45:</b> $^{13}\text{C}$ NMR spectrum of complex $[\text{Pb}(\text{CHX-PYTAM})]^{2+}$ (126 MHz, $\text{D}_2\text{O}$ , pD= 7.4, 298 K). 34                             |    |
| <b>Figure S46:</b> DEPT spectrum of complex $[\text{Pb}(\text{CHX-PYTAM})]^{2+}$ (126 MHz, $\text{D}_2\text{O}$ , pD= 7.4, 298 K). .....                                         | 34 |
| <b>Figure S47:</b> COSY NMR spectrum of complex $[\text{Pb}(\text{CHX-PYTAM})]^{2+}$ (500 MHz, $\text{D}_2\text{O}$ , pD= 7.4, 298 K).<br>.....                                  | 35 |
| <b>Figure S48:</b> HSQC NMR spectrum of complex $[\text{Pb}(\text{CHX-PYTAM})]^{2+}$ ( $\text{D}_2\text{O}$ , pD= 7.4, 298 K). .....                                             | 35 |
| <b>Figure S49:</b> HMBC NMR spectrum of complex $[\text{Pb}(\text{CHX-PYTAM})]^{2+}$ ( $\text{D}_2\text{O}$ , pD= 7.4, 298 K). .....                                             | 36 |
| <b>Figure S50:</b> HMQC NMR $^1\text{H}$ - $^{207}\text{Pb}$ spectrum of complex $[\text{Pb}(\text{CHX-PYTAM})]^{2+}$ ( $\text{D}_2\text{O}$ , pD= 7.4, 298 K).<br>.....         | 36 |
| <b>Figure S51:</b> Experimental high resolution mass spectrum (ESI $^+$ ) of compound $[\text{Pb}(\text{CHX-PYTAM})]^{2+}$ ..37                                                  |    |
| <b>Scheme S8:</b> Structure of $[\text{Pb}(\text{CHX-PYTAMGly})]^{2-}$ .....                                                                                                     | 38 |
| <b>Figure S52:</b> $^1\text{H}$ NMR spectrum of complex $[\text{Pb}(\text{CHX-PYTAMGly})]^{2-}$ (500 MHz, $\text{D}_2\text{O}$ , pD= 6.3, 298 K).<br>.....                       | 38 |
| <b>Figure S53:</b> $^{13}\text{C}$ NMR spectrum of complex $[\text{Pb}(\text{CHX-PYTAMGly})]^{2-}$ (126 MHz, $\text{D}_2\text{O}$ , pD= 6.3, 298 K).<br>.....                    | 39 |
| <b>Figure S54:</b> DEPT spectrum of complex $[\text{Pb}(\text{CHX-PYTAMGly})]^{2-}$ (126 MHz, $\text{D}_2\text{O}$ , pD= 6.3, 298 K). 39                                         |    |
| <b>Figure S55:</b> COSY NMR spectrum of complex $[\text{Pb}(\text{CHX-PYTAMGly})]^{2-}$ (500 MHz, $\text{D}_2\text{O}$ , pD= 6.3, 298 K).<br>.....                               | 40 |
| <b>Figure S56:</b> HSQC NMR spectrum of complex $[\text{Pb}(\text{CHX-PYTAMGly})]^{2-}$ ( $\text{D}_2\text{O}$ , pD= 6.3, 298 K).....                                            | 40 |
| <b>Figure S57:</b> HMBC NMR spectrum of complex $[\text{Pb}(\text{CHX-PYTAMGly})]^{2-}$ ( $\text{D}_2\text{O}$ , pD= 6.3, 298 K). .....                                          | 41 |
| <b>Figure S58:</b> HMQC NMR $^1\text{H}$ - $^{207}\text{Pb}$ spectrum of complex $[\text{Pb}(\text{CHX-PYTAMGly})]^{2-}$ ( $\text{D}_2\text{O}$ , pD= 6.3, 298 K).<br>.....      | 41 |
| <b>Figure S59:</b> Experimental high resolution mass spectrum (ESI $^-$ ) of compound $[\text{Pb}(\text{CHX-PYTAMGly})]^{2-}$ .<br>.....                                         | 42 |
| <b>Table S19:</b> Crystal Data and Structure Refinement Details for $[\text{Pb}(\text{PYTAM})](\text{PF}_6)_2$ and $[\text{Pb}(\text{H}_4\text{PYTAMGly})](\text{NO}_3)_2$ ..... | 43 |
| <b>Table S20:</b> Cartesian coordinates (Å) of $[\text{Pb}(\text{PYTAM})]^{2+}$ with optimized hydrogen positions obtained with DFT calculations.....                            | 44 |
| <b>Table S21:</b> Cartesian coordinates (Å) of $[\text{Pb}(\text{H}_4\text{PYTAMGly})]^{2+}$ with optimized hydrogen positions obtained with DFT calculations.....               | 45 |



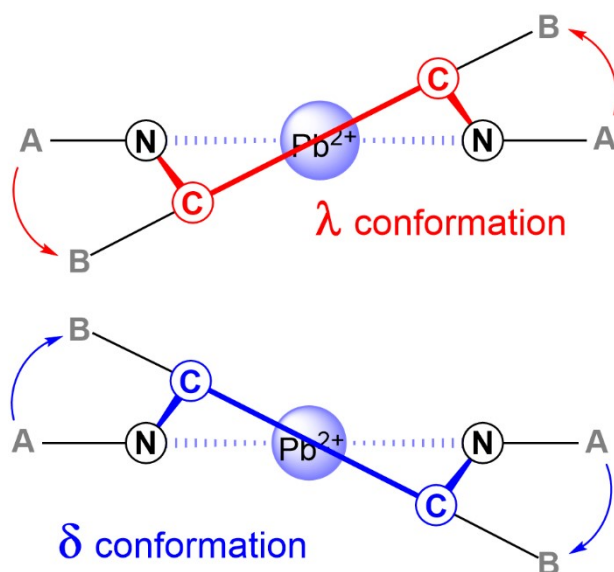

### Conformations derived from the spatial arrangement of a chelate ring

**Figure S3:** Conformations of the five-membered chelate rings formed upon coordination of the ligand ethylenediamine units.

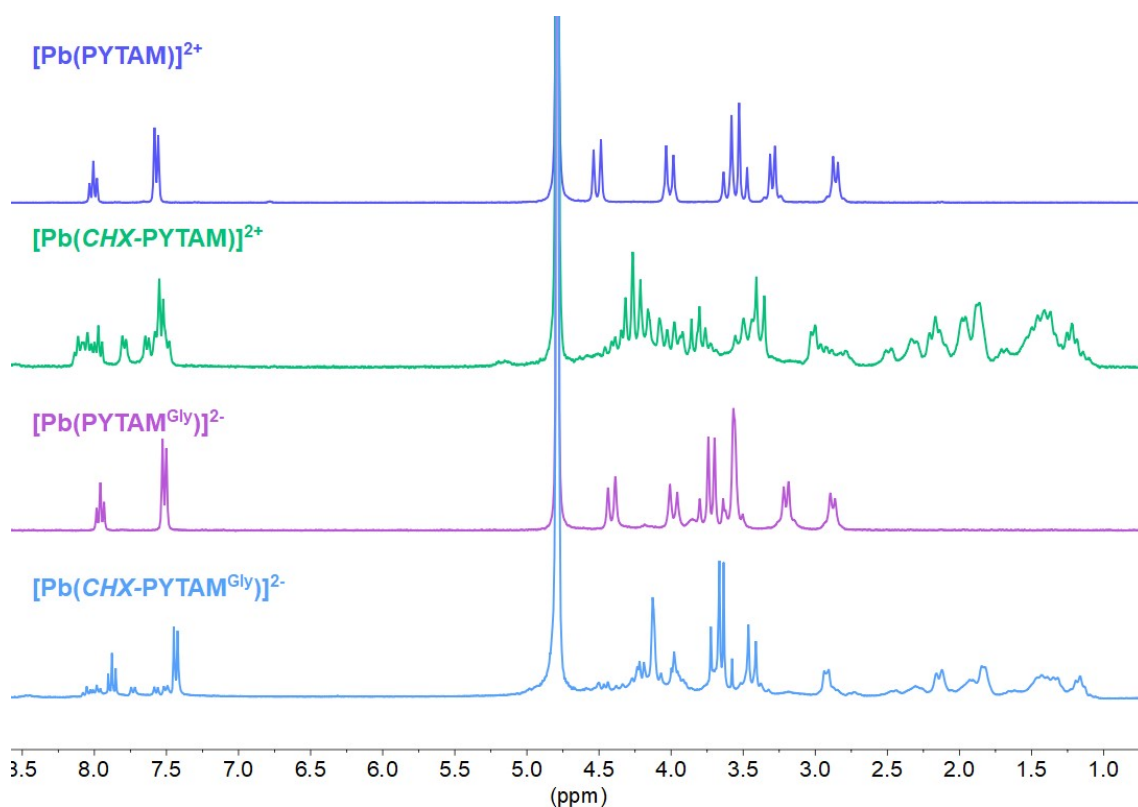

**Figure S4:**  $^1\text{H}$  NMR spectra of  $[\text{Pb}(\text{PYTAM})]^{2+}$  (pD = 1.3),  $[\text{Pb}(\text{CHX-PYTAM})]^{2+}$  (pD = 1.5),  $[\text{Pb}(\text{PYTAMGly})]^{2-}$  (pD = 1.1),  $[\text{Pb}(\text{CHX-PYTAMGly})]^{2+}$  (pD = 1.6) recorded in  $\text{D}_2\text{O}$  solution (300 MHz, 298 K).

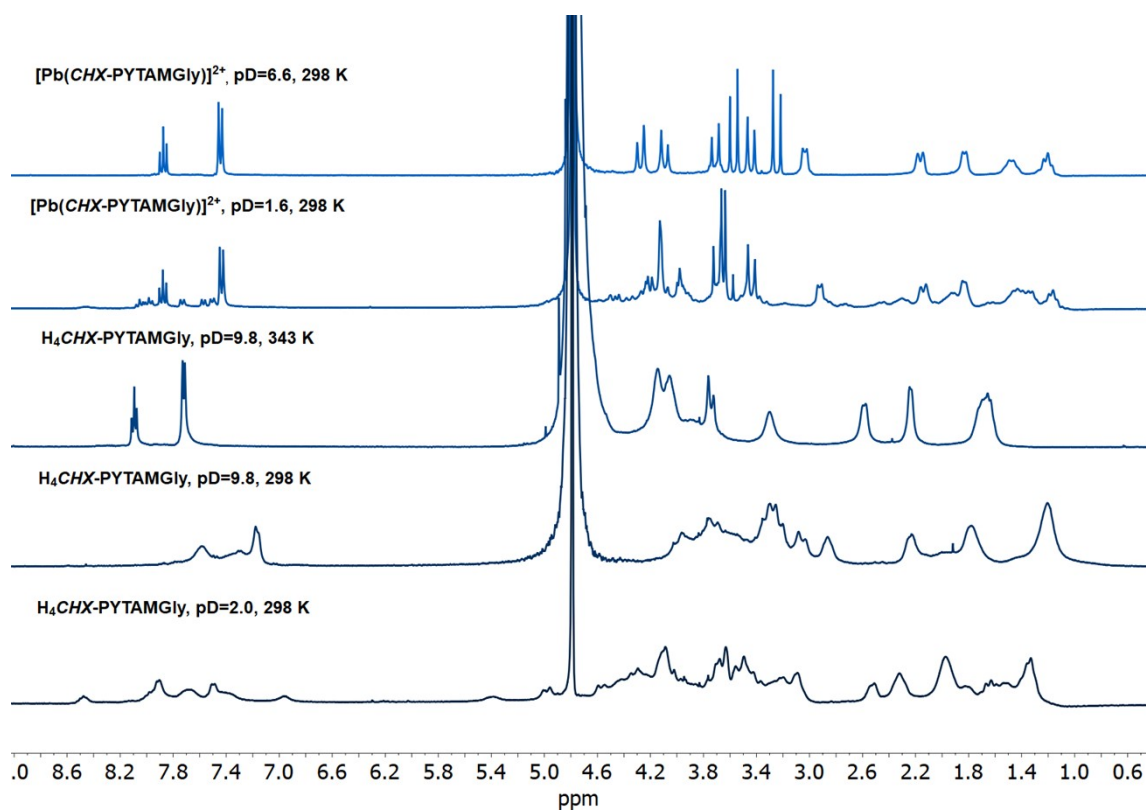

**Figure S5:** Comparison of the  $^1\text{H}$  NMR spectra of  $\text{CHX-PYTAMGly}$  and  $[\text{Pb}(\text{CHX-PYTAMGly})]^{2+}$  at different pD values.

**Table S2:**  $^1\text{H}$ -NMR chemical shifts (ppm) for the Pb(II) complexes of PYTAM,  $\text{CHX-PYTAM}$ ,  $\text{PYTAMGly}^{4-}$  and  $\text{CHX-PYTAMGly}^{4-}$  (500 MHz, 298 K,  $\text{D}_2\text{O}$ ).

|             | <b>PYTAM</b> | <b>CHX-PYTAM</b> | <b>PYTAMGly<sup>4-</sup></b> | <b>CHX-PYTAMGly<sup>4-</sup></b> |
|-------------|--------------|------------------|------------------------------|----------------------------------|
| <b>H1</b>   | 7.96 (t, 2H) | 7.91 (t, 2H)     | 7.89 (t, 2H)                 | 7.90 (t, 2H)                     |
| <b>H2</b>   | 7.51 (d, 4H) | 7.47 (d, 4H)     | 7.46 (d, 4H)                 | 7.47 (d, 4H)                     |
| <b>H4eq</b> | 3.97 (d, 4H) | 4.14 (d, 4H)     | 3.90 (d, 4H)                 | 4.12 (d, 4H)                     |
| <b>H4ax</b> | 4.47 (d, 4H) | 4.21 (d, 4H)     | 4.47 (d, 4H)                 | 4.30 (d, 4H)                     |
| <b>H5eq</b> | 3.57 (d, 4H) | 3.77 (d, 4H)     | 3.47 (d, 4H)                 | 3.73 (d, 4H)                     |
| <b>H5ax</b> | 3.46 (d, 4H) | 3.32(d, 4H)      | 3.54 (d, 4H)                 | 3.47 (d, 4H)                     |
| <b>H7eq</b> | 2.81(m, 4H)  | -                | 2.79 (d, 4H)                 | -                                |
| <b>H7ax</b> | 3.26 (m, 4H) | 2.96 (m, 4H)     | 3.25 (d, 4H)                 | 3.06 (m, 2H)                     |
| <b>H8eq</b> | -            | 2.13 (m, 4H)     | -                            | 2.19 (m, 2H)                     |
| <b>H8ax</b> | -            | 1.46 (m, 4H)     | -                            | 1.49 (m, 2H)                     |
| <b>H9eq</b> | -            | 1.81 (m, 4H)     | -                            | 1.86 (m, 2H)                     |
| <b>H9ax</b> | -            | 1.16 (m, 4H)     | -                            | 1.23 (m, 2H)                     |
| <b>H10</b>  | -            | -                | 3.59 (d, 4H)                 | 3.60 (d, 2H)                     |
|             | -            | -                | 3.27(d, 4H)                  | 3.27 (d, 2H)                     |

**Table S3:**  $^{13}\text{C}$ -NMR chemical shifts (ppm) for the Pb(II) complexes of PYTAM, CHX-PYTAM, PYTAMGly $^{4-}$  and CHX-PYTAMGly $^{4-}$  (126 MHz, 298 K, D $_2$ O).

|     | PYTAM  | CHX-PYTAM | PYTAMGly $^{4-}$ | CHX-PYTAMGly $^{4-}$ |
|-----|--------|-----------|------------------|----------------------|
| C1  | 139.71 | 139.59    | 139.27           | 139.13               |
| C2  | 123.34 | 123.61    | 123.04           | 123.29               |
| C3  | 157.46 | 157.75    | 157.53           | 158.00               |
| C4  | 57.35  | 53.39     | 57.57            | 53.60                |
| C5  | 56.04  | 52.29     | 56.99            | 53.40                |
| C6  | 175.52 | 175.92    | 172.67           | 172.95               |
| C7  | 52.57  | 61.48     | 52.47            | 61.25                |
| C8  | -      | 23.88     |                  | 24.12                |
| C9  | -      | 24.79     |                  | 24.98                |
| C10 | -      |           | 42.73            | 43.04                |
| C11 | -      |           | 175.85           | 176.10               |

**Table S4:**  $J$  coupling values (Hz) for the Pb(II) complexes of PYTAM, CHX-PYTAM, PYTAMGly $^{4-}$  and CHX-PYTAMGly $^{4-}$ .

|                           | PYTAM | CHX-PYTAM | PYTAMGly $^{4-}$ | CHX-PYTAMGly $^{4-}$ |
|---------------------------|-------|-----------|------------------|----------------------|
| $^3J(\text{H1-H2})$       | 7.8   | 7.8       | 7.8              | 7.8                  |
| $^2J(\text{H4eq-H4ax})$   | 15.2  | 15.0      | 15.1             | 14.9                 |
| $^2J(\text{H5eq-H5ax})$   | 16.6  | 16.7      | 15.8             | 15.8                 |
| $^2J(\text{H7eq-H7ax})$   | 10.2  | -         | 10.2             | -                    |
| $^2J(\text{H8eq-H8ax})$   | -     | 12.5      | -                | 12.2                 |
| $^2J(\text{H10eq-H10ax})$ | -     | -         | 17.2             | 17.2                 |
| $^3J(\text{H7ax-H8ax})$   | -     | 9.6       | -                | 9.6                  |
| $^4J(\text{H2-Pb})$       | 3.5   | -         | -                | -                    |
| $^3J(\text{H4eq-Pb})$     | 8.8   | 7.3       | 8.2              | 7.9                  |
| $^3J(\text{H5eq-Pb})$     | 7.7   | 9.4       | 8.7              | 11.4                 |
| $^3J(\text{H7eq-Pb})$     | 8.2   | -         | -                | -                    |

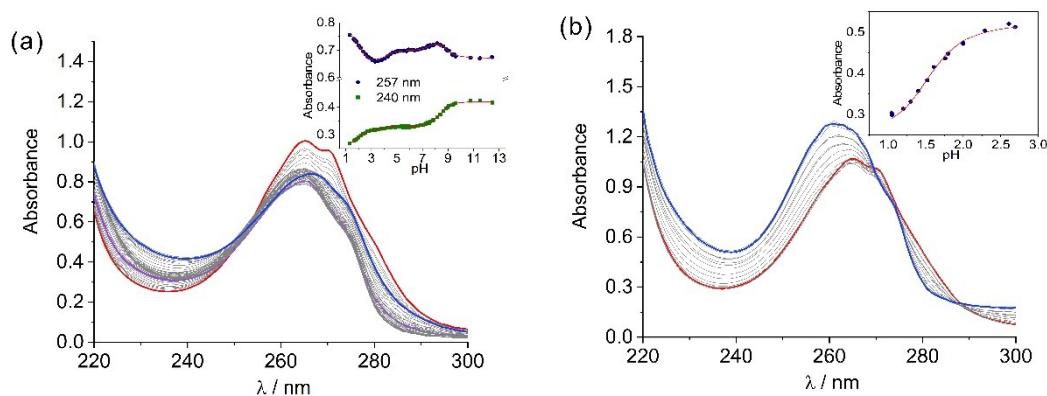

**Figure S6:** (a) UV-Vis absorption spectra recorded for a solution of CHX-PYTAMGly $^{4-}$  ( $10^{-4}$  M,  $I = 0.15$  M NaClO $_4$ , 25 °C) at different pH values. The spectra highlighted in red, violet and blue correspond to pH values of 1.30, 5.57 and 8.01, respectively. The inset shows the spectral changes at selected wavelengths and the fits of the data. (b) UV-Vis absorption spectra recorded to monitor the dissociation of the pre-formed Pb(II) complex with CHX-PYTAMGly $^{4-}$  ( $10^{-4}$  M,  $I = 0.15$  M NaClO $_4$ , 25 °C) at different pH values. The spectra highlighted in red and blue correspond to pH values of 1.05 and 2.69, respectively. The inset shows the spectral changes at 240 nm and the fit of the data.



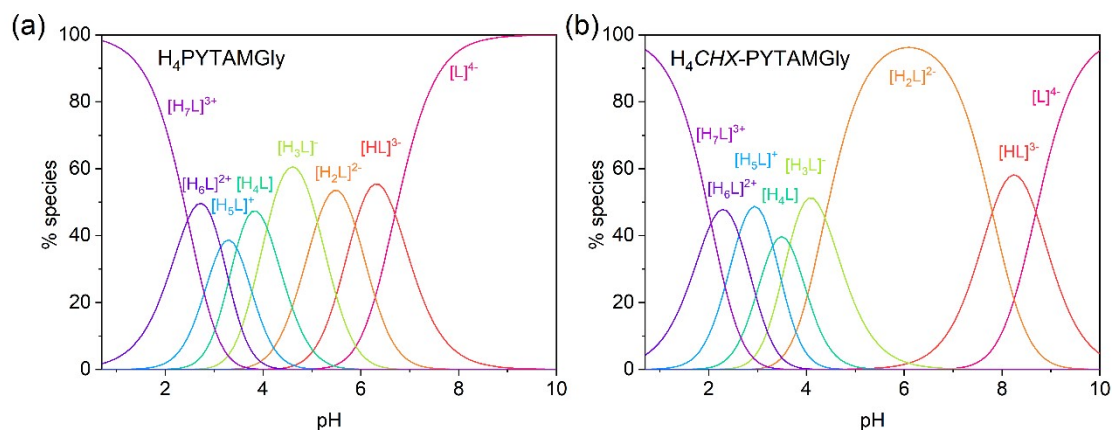

**Figure S7:** Speciation diagrams for the protonation of PYTAMGly<sup>4+</sup> and CHX-PYTAMGly<sup>4+</sup> [ $L$ ]<sub>tot</sub> = 1 mM (25 °C,  $I$  = 0.15 M NaClO<sub>4</sub>).

**Table S5:** Radiochemical yields (RCYs) for the [<sup>203</sup>Pb]Pb(II) radiolabelling reactions after 60 minutes (n=3), room temperature.

| Concentration (M) | PYTAM        | CHX-PYTAM     | PYTAMGly <sup>4+</sup> | CHX-PYTAMGly <sup>4+</sup> | DOTAM        |
|-------------------|--------------|---------------|------------------------|----------------------------|--------------|
| 10 <sup>-4</sup>  | 100 %        | 97.2 ± 1.2 %  | 100 %                  | 100 %                      | 100 %        |
| 10 <sup>-5</sup>  | 100 %        | 86.0 ± 9.5 %  | 100 %                  | 100 %                      | 100 %        |
| 10 <sup>-6</sup>  | 41.0 ± 0.6 % | 64.5 ± 11.4 % | 97.6 ± 0.9 %           | 92.4 ± 0.9 %               | 100 %        |
| 10 <sup>-7</sup>  | 6.7 ± 3.0 %  | 14.5 ± 1.4 %  | 17.5 ± 1.9 %           | 25.8 ± 9.2                 | 58.4 ± 3.5 % |
| 10 <sup>-8</sup>  | 0 %          | 1.2 ± 0.3 %   | 0 %                    | 0 %                        | 8.9 ± 3.7 %  |

**Table S6:** Radiochemical yields (RCYs) for the [<sup>203</sup>Pb]Pb(II) radiolabelling reactions after 60 minutes (n=3), 80 °C.

| Concentration (M) | PYTAM        | CHX-PYTAM    | PYTAMGly <sup>4+</sup> | CHX-PYTAMGly <sup>4+</sup> | DOTAM        |
|-------------------|--------------|--------------|------------------------|----------------------------|--------------|
| 10 <sup>-4</sup>  | 100 %        | 100 %        | 100 %                  | 100 %                      | 100 %        |
| 10 <sup>-5</sup>  | 100 %        | 100 %        | 99.6 ± 0.7 %           | 100 %                      | 100 %        |
| 10 <sup>-6</sup>  | 100 %        | 98.2 ± 1.9 % | 95.5 ± 2.2 %           | 100 %                      | 100 %        |
| 10 <sup>-7</sup>  | 63.0 ± 4.2 % | 40.4 ± 2.5 % | 14.2 ± 6.0 %           | 11.4 ± 3.7 %               | 62.7 ± 6.1 % |
| 10 <sup>-8</sup>  | 20.0 ± 6.0 % | 5.2 ± 0.8 %  | 0 %                    | 0 %                        | 11.4 ± 1.7 % |

**Table S7:** Radiochemical yields (RCYs) for the [<sup>203</sup>Pb]Pb(II) radiolabelling reactions after 30 minutes (n=3), room temperature.

| Concentration (M) | PYTAM        | CHX-PYTAM    | PYTAMGly <sup>4+</sup> | CHX-PYTAMGly <sup>4+</sup> | DOTAM        |
|-------------------|--------------|--------------|------------------------|----------------------------|--------------|
| 10 <sup>-4</sup>  | 100 %        | 94.7 ± 0.9 % | 100 %                  | 100 %                      | 100 %        |
| 10 <sup>-5</sup>  | 100 %        | 86.7 ± 6.4 % | 100 %                  | 100 %                      | 100 %        |
| 10 <sup>-6</sup>  | 29.5 ± 0.5 % | 45.7 ± 6.1 % | 97.6 ± 0.9 %           | 79.9 ± 4.5 %               | 100 %        |
| 10 <sup>-7</sup>  | 4.5 ± 0.5 %  | 12.2 ± 0.9 % | 17.5 ± 1.9 %           | 14.6 ± 12.1                | 55.8 ± 4.5 % |
| 10 <sup>-8</sup>  | 0 %          | 1.0 ± 0.2 %  | 0 %                    | 0 %                        | 7.6 ± 1.8 %  |

**Table S8:** Radiochemical yields (RCYs) for the [<sup>203</sup>Pb]Pb(II) radiolabelling reactions after 30 minutes (n=3), 80 °C.

| Concentration (M) | PYTAM | CHX-PYTAM | PYTAMGly <sup>4+</sup> | CHX-PYTAMGly <sup>4+</sup> | DOTAM |
|-------------------|-------|-----------|------------------------|----------------------------|-------|
| 10 <sup>-4</sup>  | 100 % | 100 %     | 100 %                  | 100 %                      | 100 % |

|           |                  |                  |                  |                 |                  |
|-----------|------------------|------------------|------------------|-----------------|------------------|
| $10^{-5}$ | 100 %            | $99.7 \pm 0.4$ % | 100 %            | 100 %           | 100 %            |
| $10^{-6}$ | 100 %            | $97.8 \pm 2.0$ % | $95.3 \pm 3.1$ % | 100 %           | 100 %            |
| $10^{-7}$ | $62.3 \pm 7.5$ % | $41.8 \pm 3.4$ % | $7.3 \pm 1.7$ %  | $6.1 \pm 3.4$ % | $62.7 \pm 6.1$ % |
| $10^{-8}$ | $17.0 \pm 5.2$ % | $4.8 \pm 2.2$ %  | 0 %              | 0 %             | $11.4 \pm 1.7$ % |

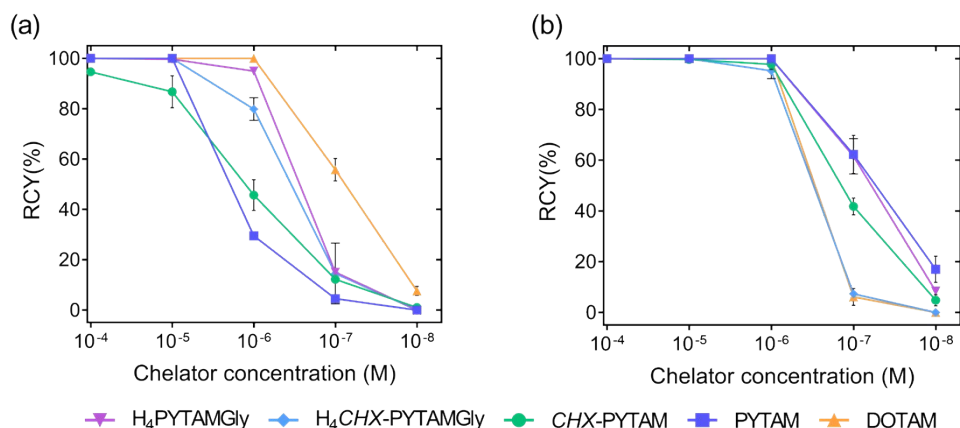

**Figure S8:** Radiolabelling studies using  $^{203}\text{Pb}$  ( $\sim 150$  kBq,  $0.1$  M  $\text{NH}_4\text{OAc}$  buffer,  $\text{pH}=7.4$ ). (a) Concentration dependent radiolabelling at room temperature after 30 min. (b) Concentration dependent radiolabelling at  $80$  °C after 30 min

**Table S9:** Radiochemical yields (RCYs) for the  $^{203}\text{Pb}[\text{Pb}(\text{II})]$  radiolabelling of CHX-PYTAM at  $37$  °C.

| Concentration (M) | CHX-PYTAM (30 min) | CHX-PYTAM (60 min) |
|-------------------|--------------------|--------------------|
| $10^{-4}$         | $98.5 \pm 0.4$ %   | 100 %              |
| $10^{-5}$         | $97.3 \pm 0.5$ %   | $99.6 \pm 0.6$ %   |
| $10^{-6}$         | $73.0 \pm 2.3$ %   | $84.0 \pm 13.2$ %  |
| $10^{-7}$         | $21.9 \pm 3.2$ %   | $6.5 \pm 1.8$ %    |
| $10^{-8}$         | $3.5 \pm 0.1$ %    | $4.9 \pm 0.4$ %    |

**Table S10:** In vitro stability of the  $^{203}\text{Pb}$ -labeled chelators at  $37$  °C in human serum ( $n=3$ ).

| Time (h) | PYTAM            | CHX-PYTAM | PYTAMGly <sup>4-</sup> | CHX-PYTAMGly <sup>4-</sup> | DOTAM |
|----------|------------------|-----------|------------------------|----------------------------|-------|
| 0        | 100 %            | 100 %     | 100 %                  | $98.0 \pm 0.7$ %           | 100 % |
| 24       | 100 %            | 100 %     | 100 %                  | $97.8 \pm 1.4$ %           | 100 % |
| 48       | $98.9 \pm 0.9$ % | 100 %     | 100 %                  | $97.5 \pm 0.5$ %           | 100 % |
| 72       | $97.9 \pm 1.5$ % | 100 %     | $99.6 \pm 0.7$ %       | $96.5 \pm 0.9$ %           | 100 % |

**Table S11:** Stability of the  $^{203}\text{Pb}$ -labeled chelators prepared at  $80$  °C in a 20-fold excess EDTA ( $n=3$ ).

| Time (h) | PYTAM | CHX-PYTAM | PYTAMGly <sup>4-</sup> | CHX-PYTAMGly <sup>4-</sup> | DOTAM |
|----------|-------|-----------|------------------------|----------------------------|-------|
| 0        | 100 % | 100 %     | 100 %                  | 100 %                      | 100 % |
| 0.0833   | 100 % | 100 %     | 100 %                  | $88.2 \pm 8.9$ %           | 100 % |
| 0.5      | 100 % | 100 %     | 100 %                  | $76.2 \pm 8.5$ %           | 100 % |
| 1        | 100 % | 100 %     | 100 %                  | $73.3 \pm 10.1$ %          | 100 % |
| 2        | 100 % | 100 %     | 100 %                  | $71.6 \pm 6.4$ %           | 100 % |
| 24       | 100 % | 100 %     | 100 %                  | $60.0 \pm 4.0$ %           | 100 % |
| 48       | 100 % | 100 %     | 100 %                  | $56.3 \pm 5.7$ %           | 100 % |
| 72       | 100 % | 100 %     | 100 %                  | $52.9 \pm 6.7$ %           | 100 % |

**Table S12:** Stability of the  $^{203}\text{Pb}$ -labeled chelators prepared at room temperature in a 20-fold excess EDTA ( $n=3$ ).

| Time (h) | PYTAM        | CHX-PYTAM    | PYTAMGly <sup>4-</sup> | CHX-PYTAMGly <sup>4-</sup> | DOTAM |
|----------|--------------|--------------|------------------------|----------------------------|-------|
| 0        | 100 %        | 100 %        | 100 %                  | 99.1 ± 0.9 %               | 100 % |
| 0.0833   | 100 %        | 99.7 ± 0.5 % | 100 %                  | 92.5 ± 3.9 %               | 100 % |
| 0.5      | 100 %        | 100 %        | 100 %                  | 89.5 ± 4.8 %               | 100 % |
| 1        | 100 %        | 99.8 ± 0.2 % | 99.0 ± 1.0 %           | 88.1 ± 7.7 %               | 100 % |
| 2        | 100 %        | 100 %        | 98.2 ± 0.4 %           | 84.3 ± 9.1 %               | 100 % |
| 24       | 100 %        | 98.6 ± 1.1 % | 97.7 ± 1.1 %           | 69.2 ± 3.1 %               | 100 % |
| 48       | 100 %        | 99.8 ± 0.4 % | 97.8 ± 0.3 %           | 64.0 ± 6.8 %               | 100 % |
| 72       | 98.7 ± 0.3 % | 97.8 ± 1.1 % | 98.0 ± 1.4 %           | 65.5 ± 5.2 %               | 100 % |

**Table S13:** Stability of the <sup>203</sup>Pb-labeled chelators prepared at 80 °C in a 20-fold excess Pb(II)(n=3).

| Time (h) | PYTAM        | CHX-PYTAM    | PYTAMGly <sup>4-</sup> | CHX-PYTAMGly <sup>4-</sup> | DOTAM |
|----------|--------------|--------------|------------------------|----------------------------|-------|
| 0        | 100 %        | 100 %        | 100 %                  | 100 %                      | 100 % |
| 0.0833   | 99.7 ± 0.4 % | 100 %        | 83.8 ± 1.5 %           | 94.9 ± 4.1 %               | 100 % |
| 0.5      | 97.6 ± 0.3 % | 100 %        | 39.4 ± 3.0 %           | 89.3 ± 5.0 %               | 100 % |
| 1        | 96.8 ± 0.1 % | 100 %        | 34.3 ± 4.6 %           | 89.1 ± 4.1 %               | 100 % |
| 2        | 93.2 ± 0.7 % | 100 %        | 13.5 ± 2.0 %           | 82.3 ± 4.7 %               | 100 % |
| 24       | 66.0 ± 1.6 % | 100 %        | 7.1 ± 1.1 %            | 70.8 ± 5.1 %               | 100 % |
| 48       | 54.9 ± 3.5 % | 95.9 ± 0.3 % | 6.5 ± 1.3 %            | 56.1 ± 4.4 %               | 100 % |
| 72       | 37.0 ± 2.0 % | 93.2 ± 0.6 % | 6.1 ± 1.0 %            | 54.3 ± 1.5 %               | 100 % |

**Table S14:** Stability of the <sup>203</sup>Pb-labeled chelators prepared at room temperature in a 20-fold excess Pb(II) (n=3).

| Time (h) | PYTAM        | CHX-PYTAM    | PYTAMGly <sup>4-</sup> | CHX-PYTAMGly <sup>4-</sup> | DOTAM |
|----------|--------------|--------------|------------------------|----------------------------|-------|
| 0        | 100 %        | 100 %        | 100 %                  | 100 %                      | 100 % |
| 0.0833   | 98.6 ± 0.4 % | 99.7 ± 0.5 % | 69.4 ± 4.3 %           | 92.2 ± 4.9 %               | 100 % |
| 0.5      | 97.2 ± 0.2 % | 98.0 ± 1.9 % | 26.5 ± 1.0 %           | 82.6 ± 4.5 %               | 100 % |
| 1        | 96.6 ± 0.2 % | 98.0 ± 0.7 % | 12.7 ± 1.0 %           | 81.9 ± 4.6 %               | 100 % |
| 2        | 96.4 ± 0.6 % | 95.9 ± 0.8 % | 5.1 ± 0.3 %            | 76.4 ± 7.8 %               | 100 % |
| 24       | 66.1 ± 1.5 % | 93.6 ± 1.0 % | 5.5 ± 1.5 %            | 51.9 ± 3.6 %               | 100 % |
| 48       | 43.7 ± 8.2 % | 92.9 ± 1.7 % | 4.6 ± 0.4 %            | 42.7 ± 1.9 %               | 100 % |
| 72       | 25.0 ± 2.4 % | 90.5 ± 1.5 % | 4.1 ± 0.5 %            | 24.7 ± 2.2 %               | 100 % |

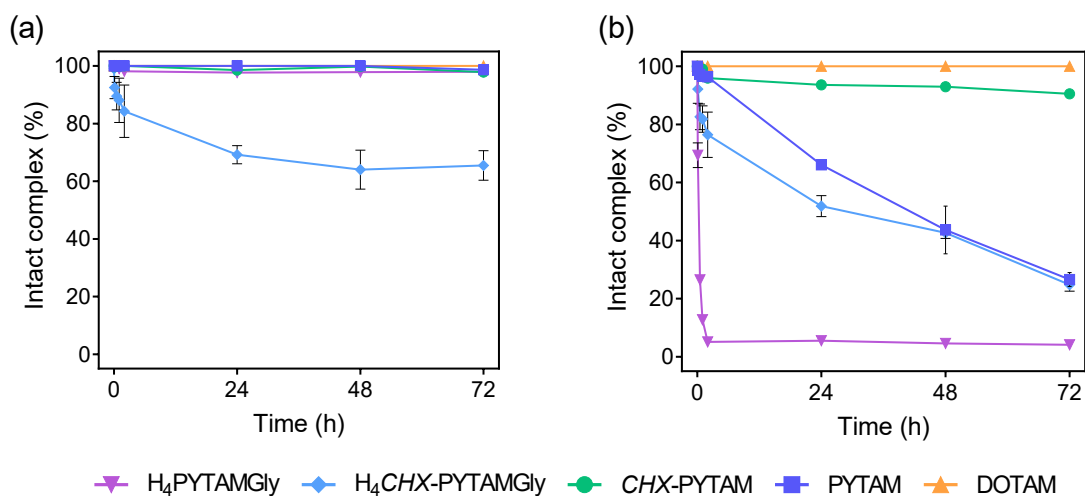

**Figure S9** Challenging studies of the <sup>203</sup>Pb-labelled complexes prepared at room temperature. (a) Excess EDTA challenge (20 equiv.). (b) Excess cold Pb(II) challenge (20 equiv.).

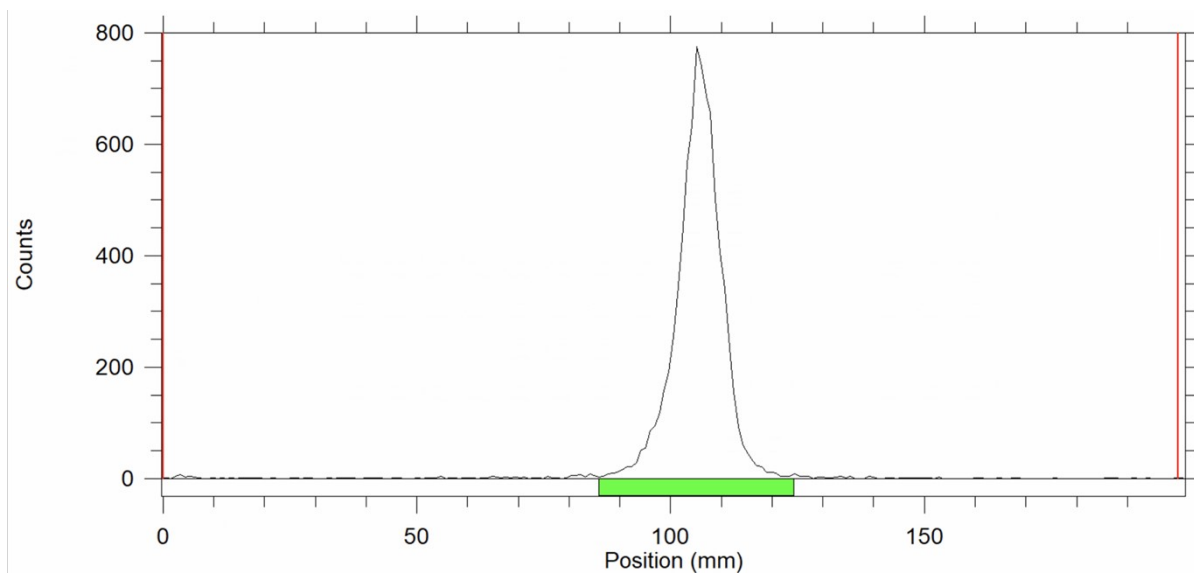

**Figure S10:** Negative control showing no radiolabelling with  $[^{203}\text{Pb}]\text{Pb}(\text{II})$ .

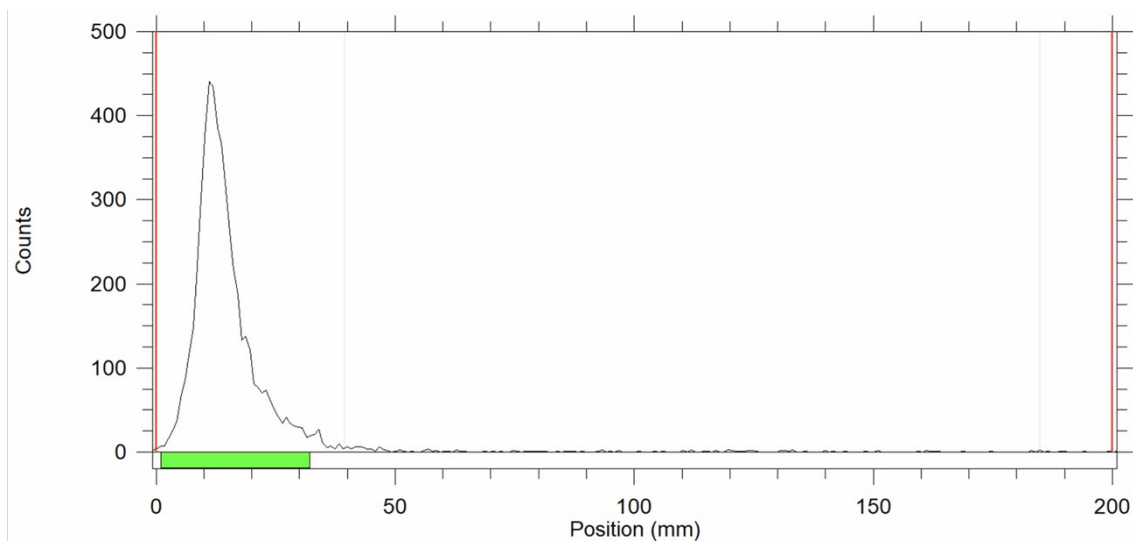

**Figure S11:** Example of iTLC showing quantitative radiolabelling of *PYTAM* with  $[^{203}\text{Pb}]\text{Pb}(\text{II})$ .

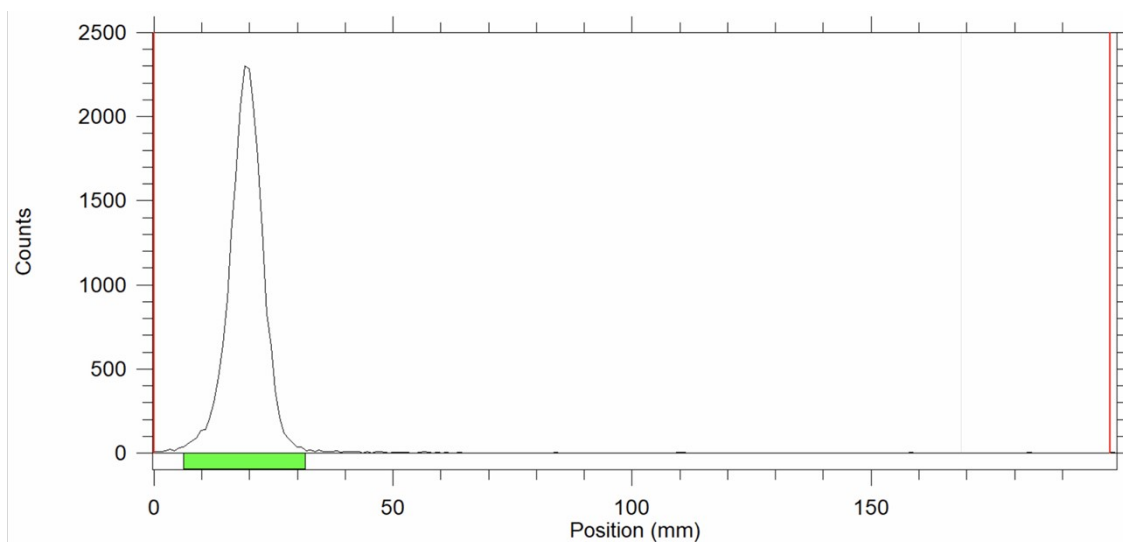

**Figure S12:** Example of iTLC showing quantitative radiolabelling of *CHX-PYTAM* with  $[^{203}\text{Pb}]\text{Pb}(\text{II})$ .

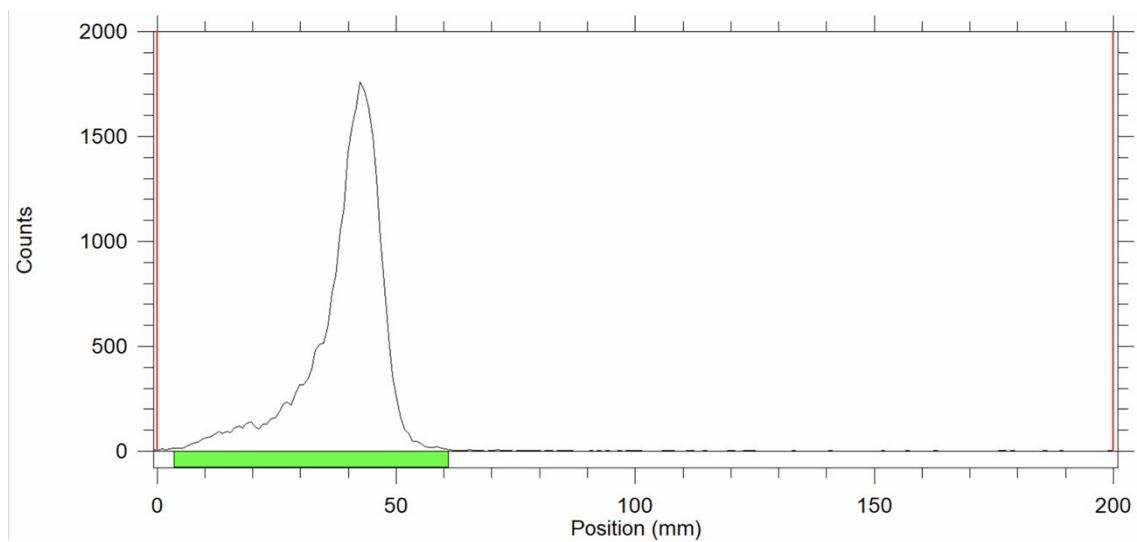

**Figure S13:** Example of iTLC showing quantitative radiolabelling of H<sub>4</sub>PYTAMGly with [<sup>203</sup>Pb]Pb(II).

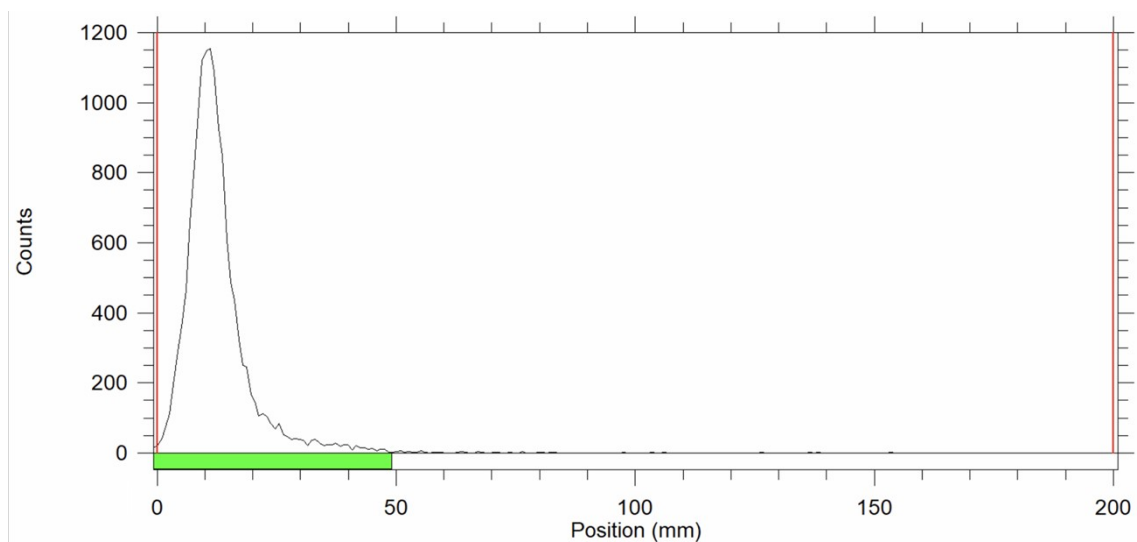

**Figure S14:** Example of iTLC showing quantitative radiolabelling of H<sub>4</sub>CHX-PYTAMGly with [<sup>203</sup>Pb]Pb(II).

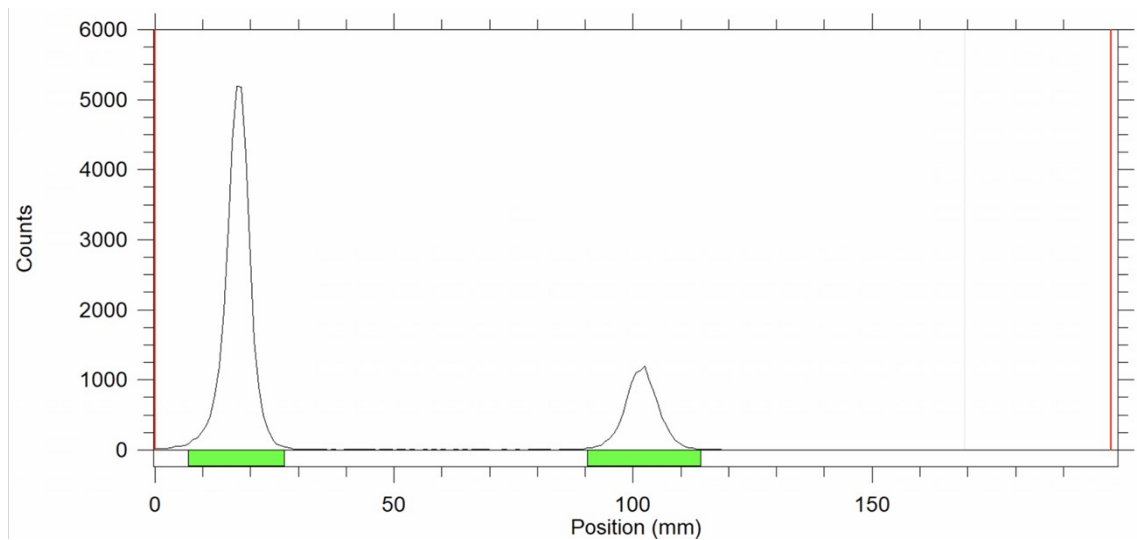

**Figure S15:** Example of iTLC showing ~75% radiolabelling of CHX-PYTAM with [<sup>203</sup>Pb]Pb(II).

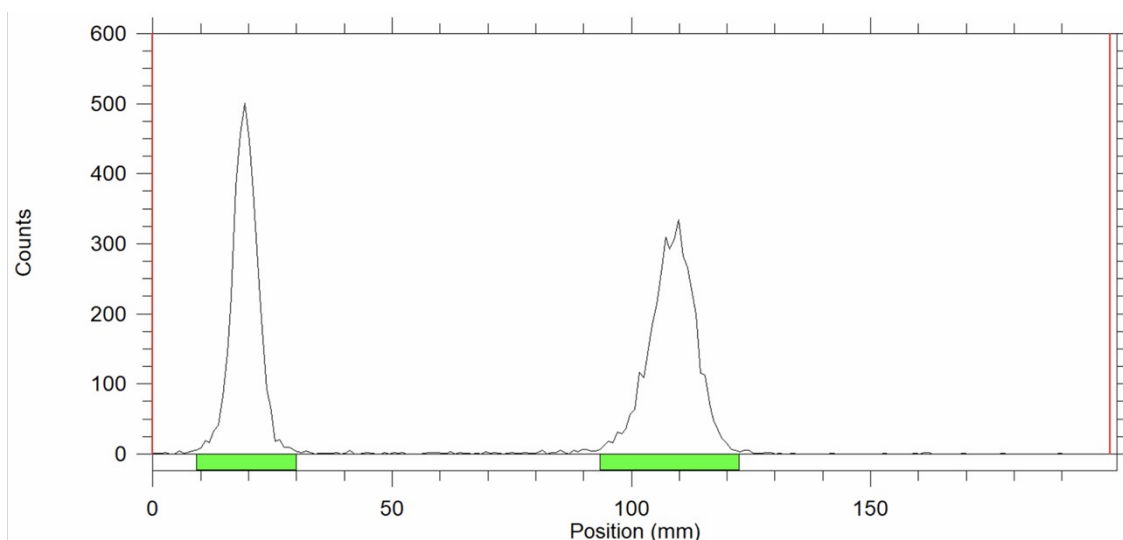

**Figure S16:** Example of iTLC showing ~45% radiolabelling of PYTAM with [ $^{203}\text{Pb}$ ]Pb(II).

**Table S15:** MPLC purification method A

| Column volumes (CV) | Time (min:s) | Flow rate (mL/min) | %A (H <sub>2</sub> O) | %B (CH <sub>3</sub> CN) |
|---------------------|--------------|--------------------|-----------------------|-------------------------|
| 0.00                | 0:00         | 15                 | 100                   | 0                       |
| 4.00                | 5:28         | 15                 | 100                   | 0                       |
| 4.62                | 6:19         | 15                 | 90                    | 10                      |
| 4.67                | 6:23         | 15                 | 90                    | 10                      |
| 6.13                | 8:23         | 15                 | 65                    | 35                      |
| 6.17                | 8:26         | 15                 | 65                    | 35                      |
| 6.22                | 8:29         | 15                 | 64                    | 36                      |
| 7.17                | 9:47         | 15                 | 64                    | 36                      |
| 11.01               | 15:02        | 15                 | 0                     | 100                     |
| 17.01               | 23:13        | 15                 | 0                     | 100                     |

**Table S16:** MPLC purification method B

| Column volumes (CV) | Time (min:s) | Flow rate (mL/min) | %A (H <sub>2</sub> O) | %B (CH <sub>3</sub> CN) |
|---------------------|--------------|--------------------|-----------------------|-------------------------|
| 0.00                | 0            | 15                 | 100                   | 0                       |
| 6.00                | 8:12         | 15                 | 100                   | 0                       |
| 7.93                | 10:43        | 15                 | 73                    | 27                      |
| 9.23                | 12:41        | 15                 | 73                    | 27                      |
| 13.59               | 16:43        | 15                 | 0                     | 100                     |
| 19.59               | 18:49        | 15                 | 0                     | 100                     |

**Table S17:** MPLC purification method C

| Column volumes (CV) | Time (min:s) | Flow rate (mL/min) | %A (H <sub>2</sub> O) | %B (CH <sub>3</sub> CN) |
|---------------------|--------------|--------------------|-----------------------|-------------------------|
| 0.00                | 0            | 15                 | 100                   | 0                       |
| 6.00                | 8:12         | 15                 | 100                   | 0                       |
| 8.43                | 11:31        | 15                 | 59                    | 41                      |
| 9.84                | 13:27        | 15                 | 59                    | 41                      |
| 13.39               | 18:18        | 15                 | 0                     | 100                     |
| 19.39               | 26:30        | 15                 | 0                     | 100                     |

**Table S18:** HPLC conditions for the purification of the chelators (A = H<sub>2</sub>O+0.1%TFA, B = CH<sub>3</sub>CN+0.1%TFA)

| <b>Chelator</b>             | <b>Conditions</b>                                               | <b>Retention time (min)</b> |
|-----------------------------|-----------------------------------------------------------------|-----------------------------|
| PYTAM                       | Isocratic 95% A (8 min)                                         | 5.91                        |
| CHX-PYTAM                   | 85 to 65% A (10 min)                                            | 6.37                        |
| H <sub>4</sub> PYTAM-Gly    | Isocratic 95% A (2 min) and<br>gradient from 95 to 50% (16 min) | 8.62                        |
| H <sub>4</sub> CHX-PYTAMGly | 90 to 70% A (25 min)                                            | 15.11                       |

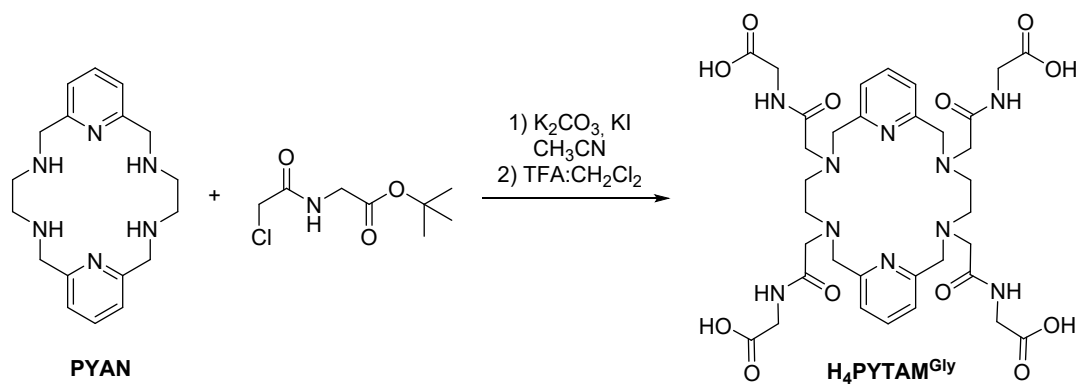

**Scheme S1:** Synthesis of **H<sub>4</sub>PYTAMGly**.

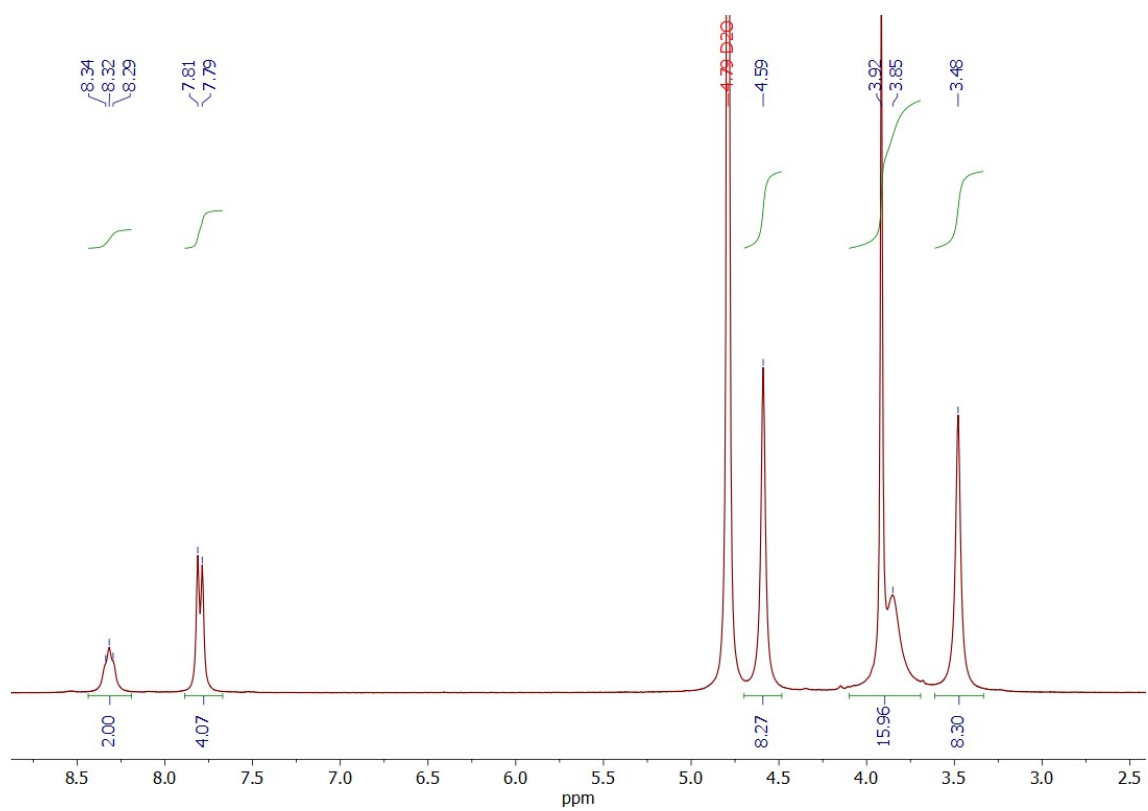

**Figure S17:**  $^1H$  NMR spectrum of compound **H<sub>4</sub>PYTAMGly** (300 MHz,  $D_2O$ , pD= 2.00, 298 K).



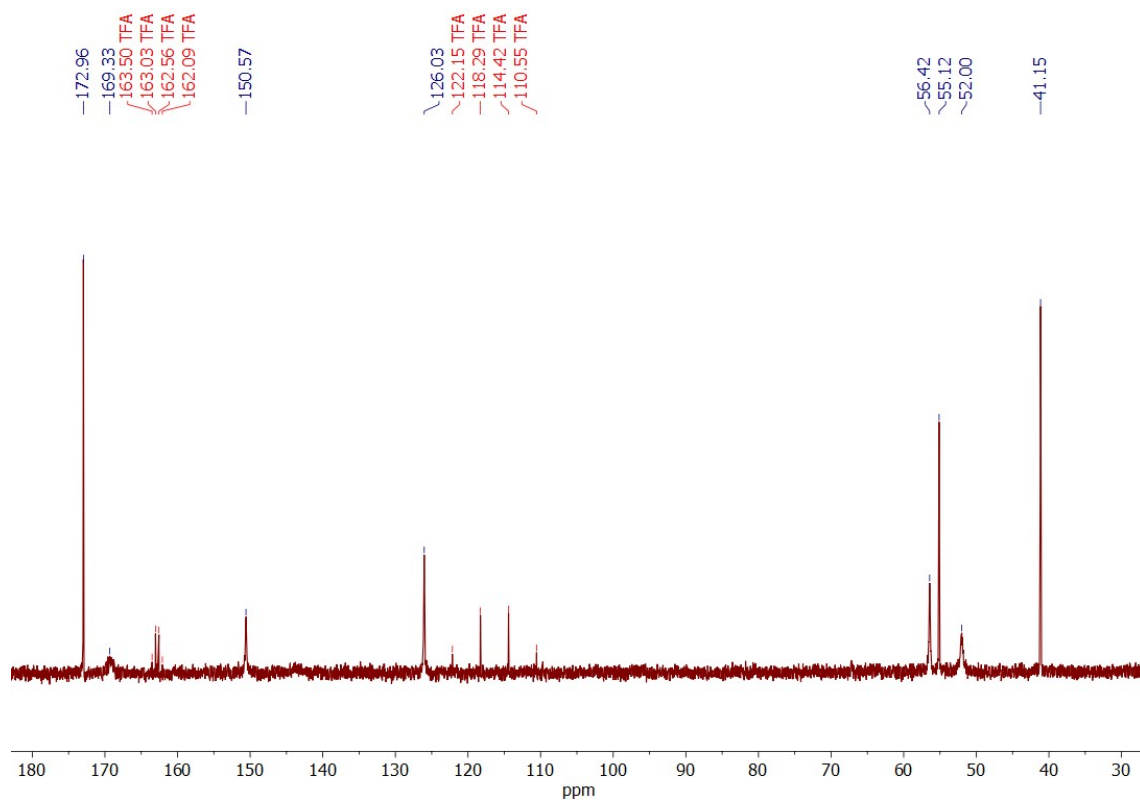

**Figure S18:**  $^{13}\text{C}$  NMR spectrum of compound  $\text{H}_4\text{PYTAMGly}$ . (75 MHz,  $\text{D}_2\text{O}$ , pD= 2.00, 298 K).

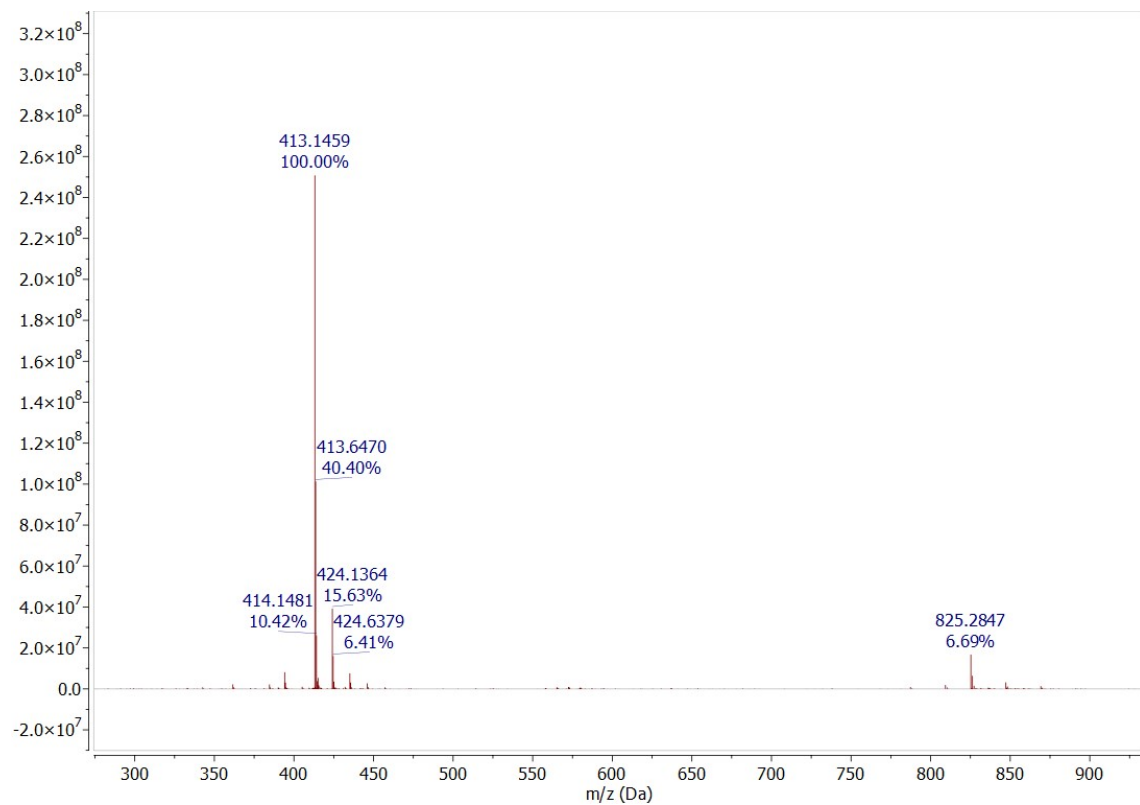

**Figure S19:** Experimental high resolution mass spectrum ( $\text{ESI}^+$ ) of compound  $\text{H}_4\text{PYTAMGly}$ .

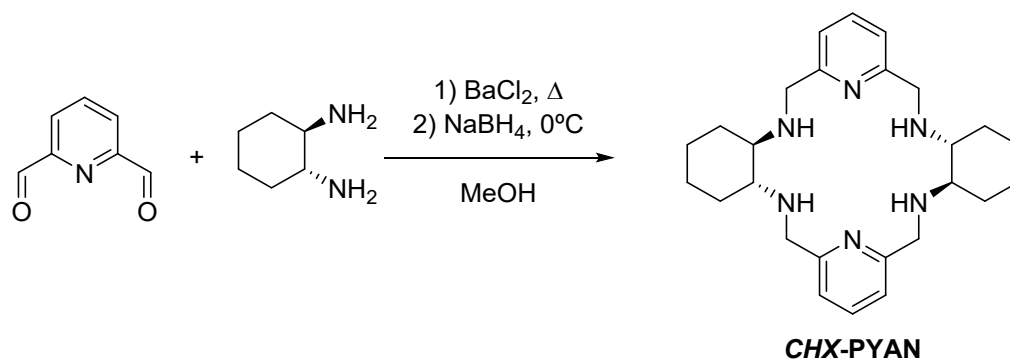

**Scheme S2:** Synthesis of *CHX-PYAN*.

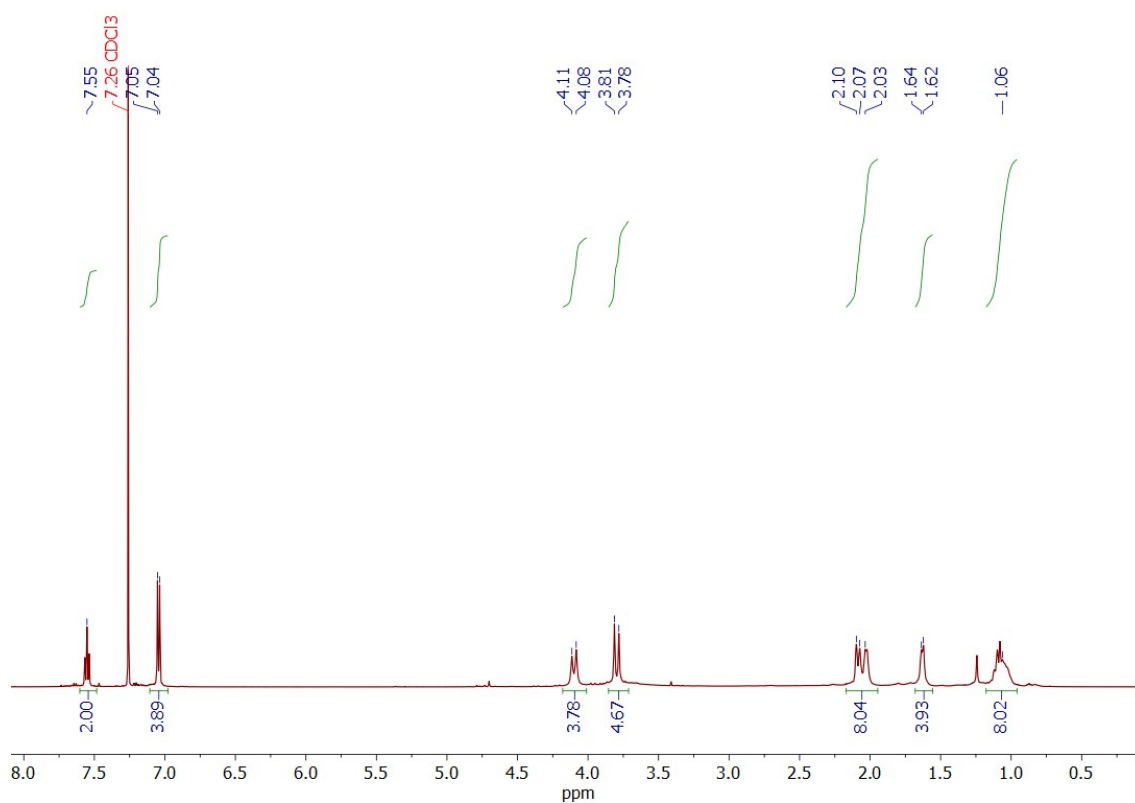

**Figure S20:** <sup>1</sup>H NMR spectrum of *CHX-PYAN* (500 MHz, CDCl<sub>3</sub>, 298 K).

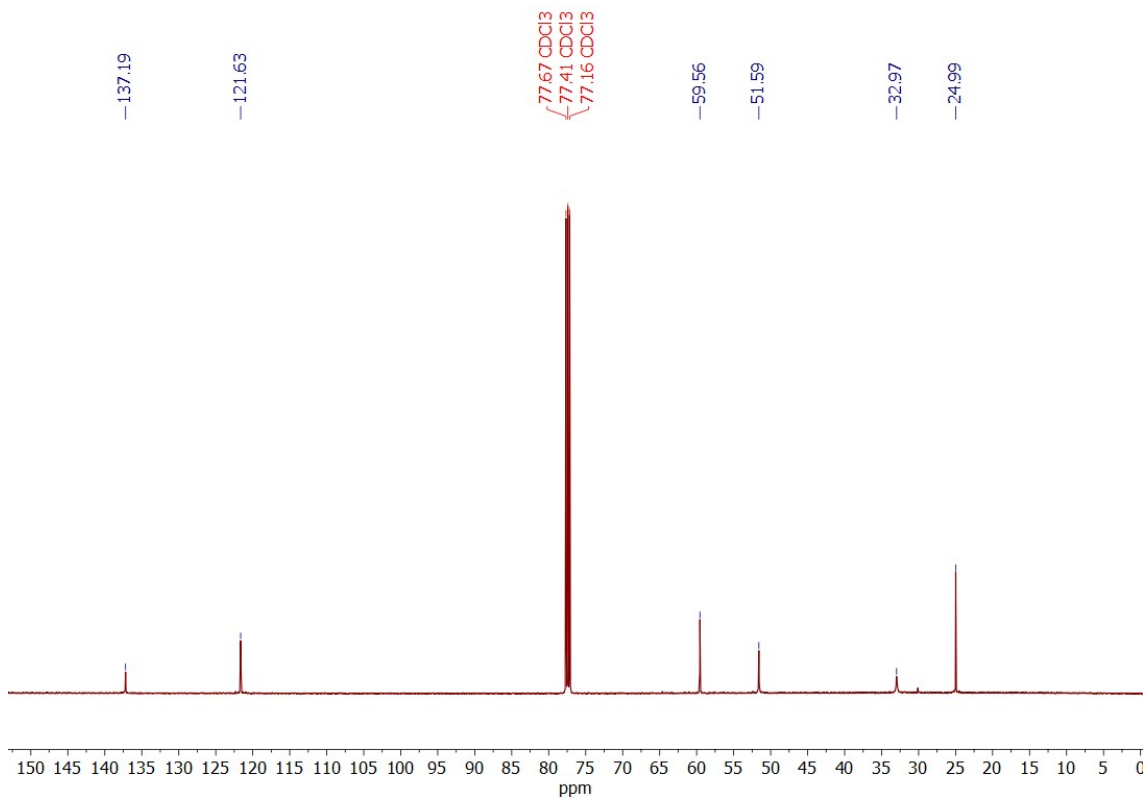

**Figure S21:** <sup>13</sup>C NMR spectrum of *CHX-PYAN* (126 MHz, CDCl<sub>3</sub>, 298 K).

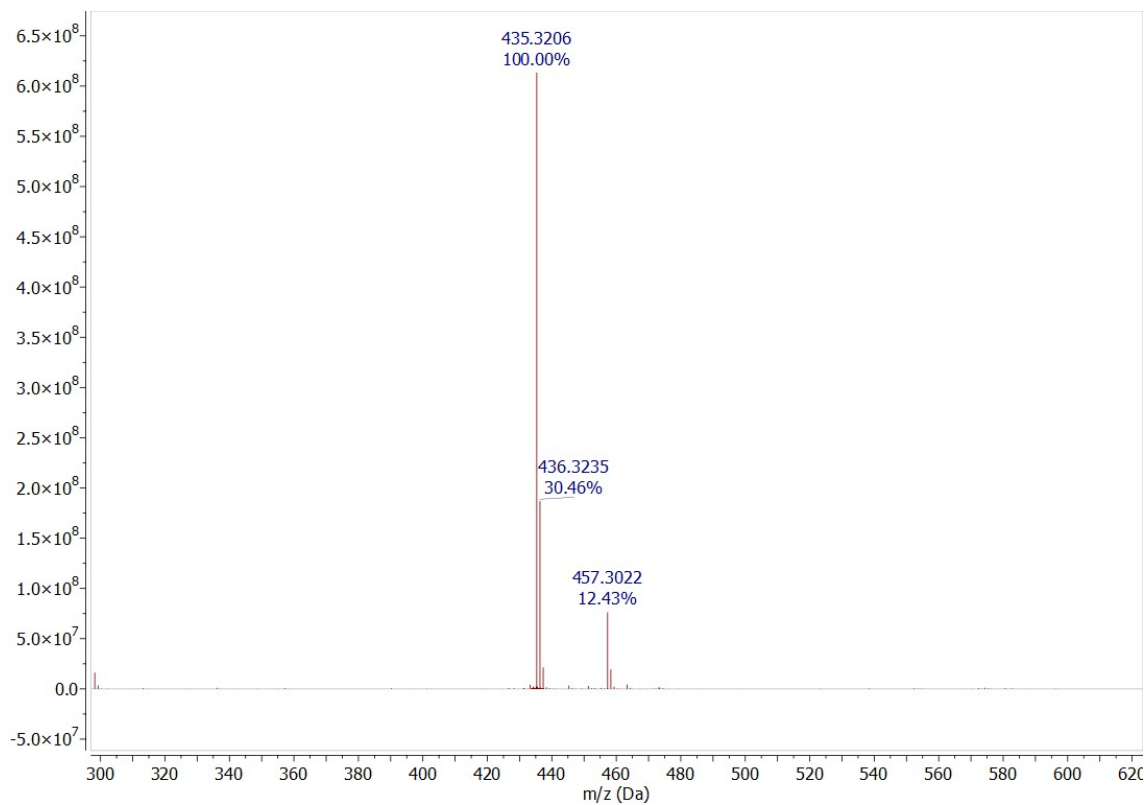

**Figure S22:** Experimental high resolution mass spectrum (ESI<sup>+</sup>) of *CHX-PYAN*.

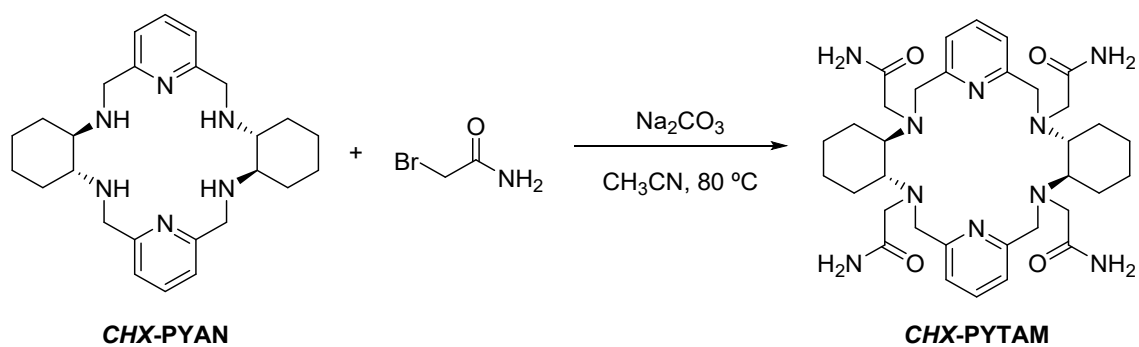

**Scheme S3:** Synthesis of **CHX-PYTAM**

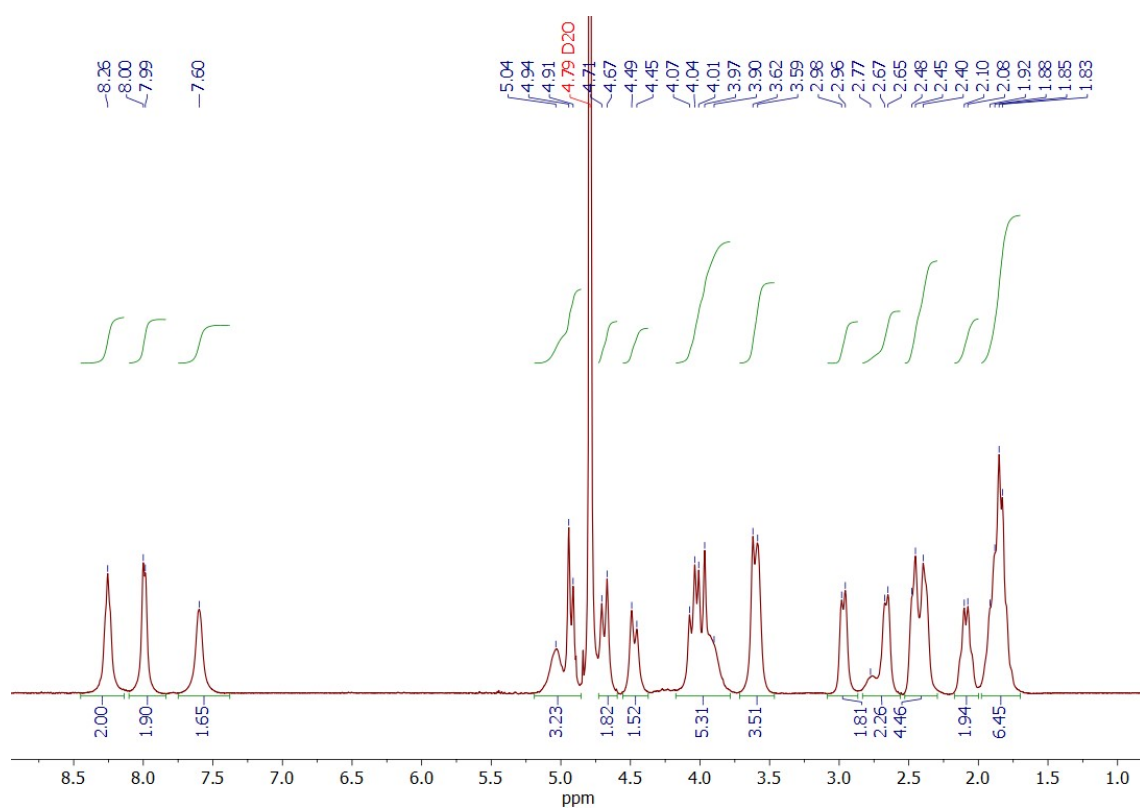

**Figure S23:** <sup>1</sup>H NMR spectrum of compound **CHX-PYTAM** (400 MHz, D<sub>2</sub>O, pD= 1.74, 343.15 K).

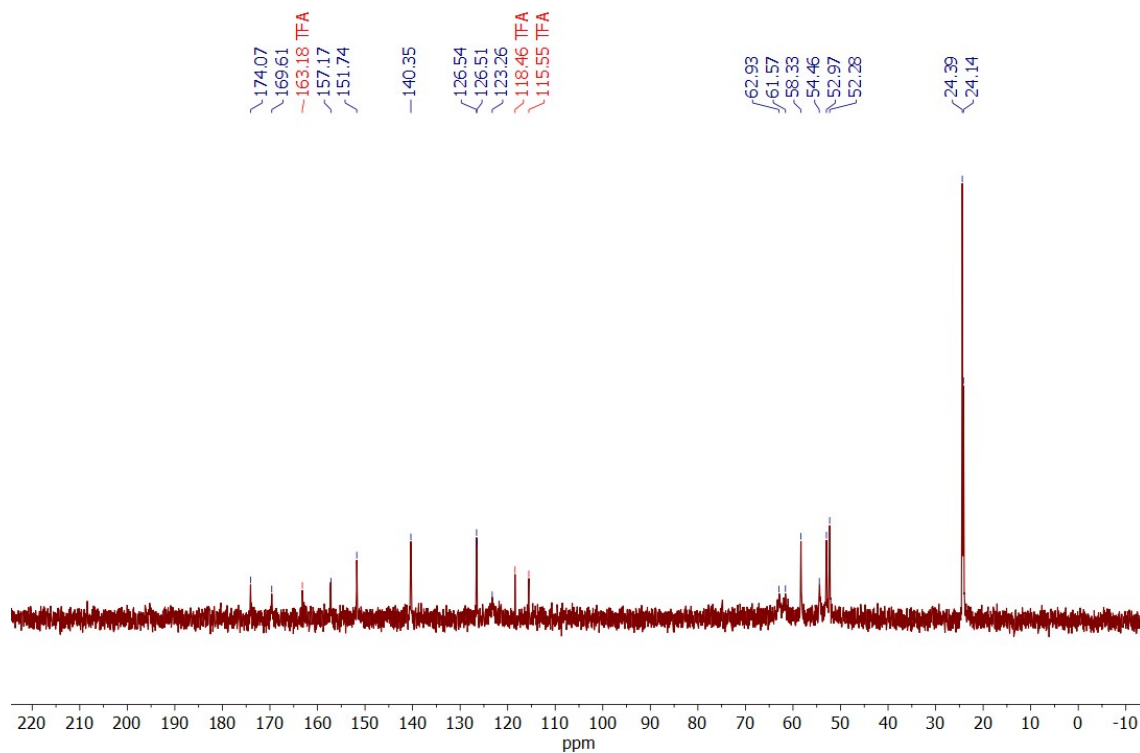

**Figure S24:**  $^{13}\text{C}$  NMR spectrum of compound **CHX-PYTAM** (101 MHz,  $\text{D}_2\text{O}$ , pD= 1.74, 343.15 K).

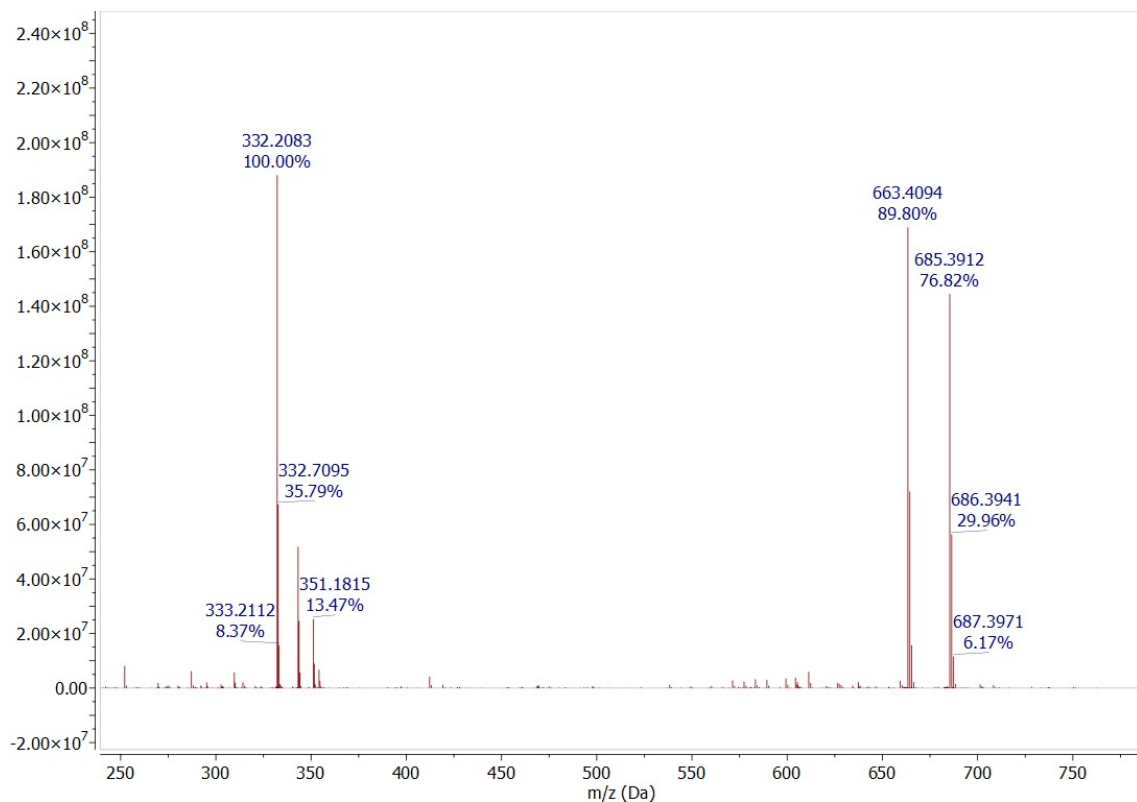

**Figure S25:** Experimental high resolution mass spectrum ( $\text{ESI}^+$ ) of compound **CHX-PYTAM**.

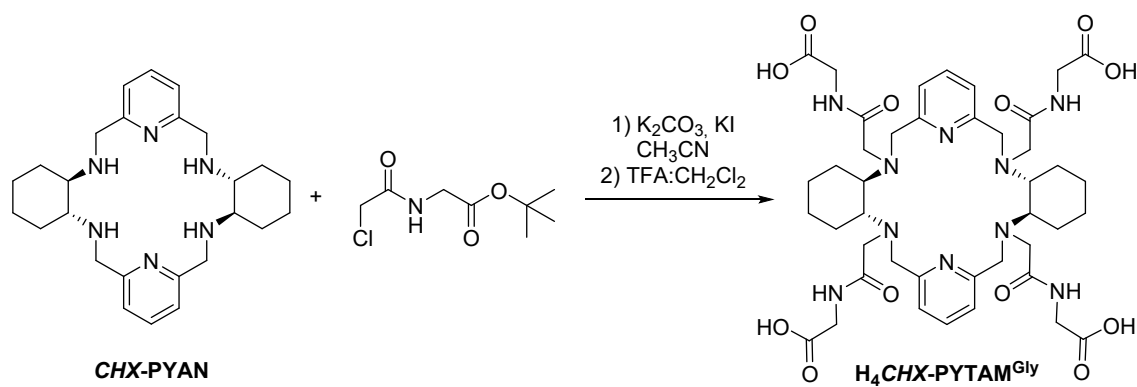

**Scheme S4:** Synthesis of  $\text{H}_4\text{CHX-PYTAM}^{\text{Gly}}$

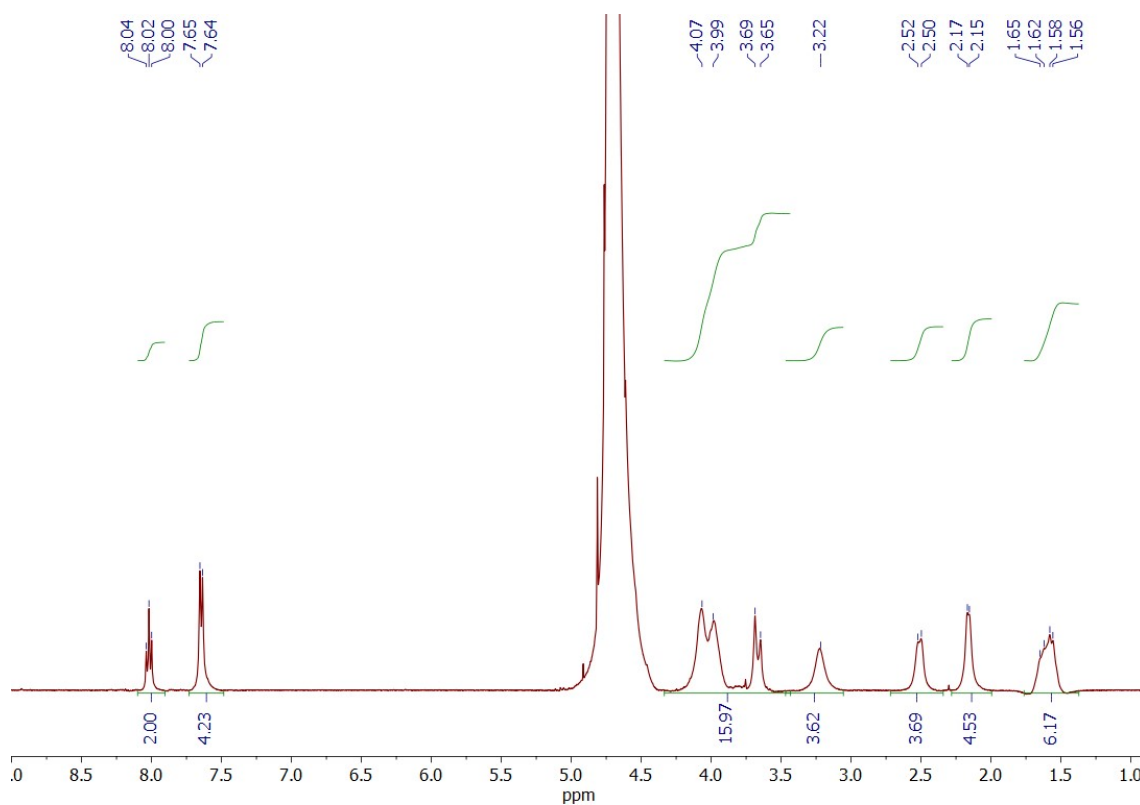

**Figure S26:**  $^1\text{H NMR}$  spectrum of compound  $\text{H}_4\text{CHX-PYTAM}^{\text{Gly}}$  (400 MHz,  $\text{D}_2\text{O}$ ,  $\text{pD}=9.8$ , 343.15 K).

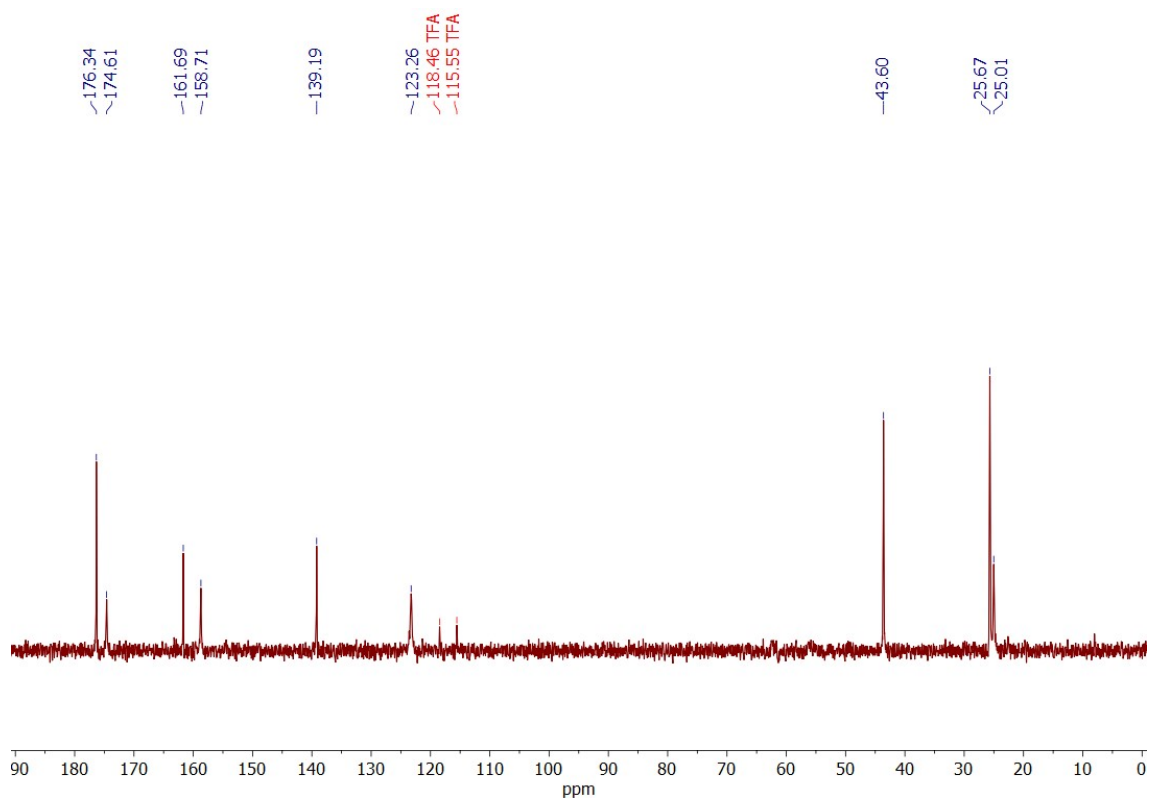

**Figure S27:**  $^{13}\text{C}$  NMR spectrum of compound  $\text{H}_4\text{CHX-PYTAMGly}$  (400 MHz,  $\text{D}_2\text{O}$ , pD= 9.8, 343.15 K).

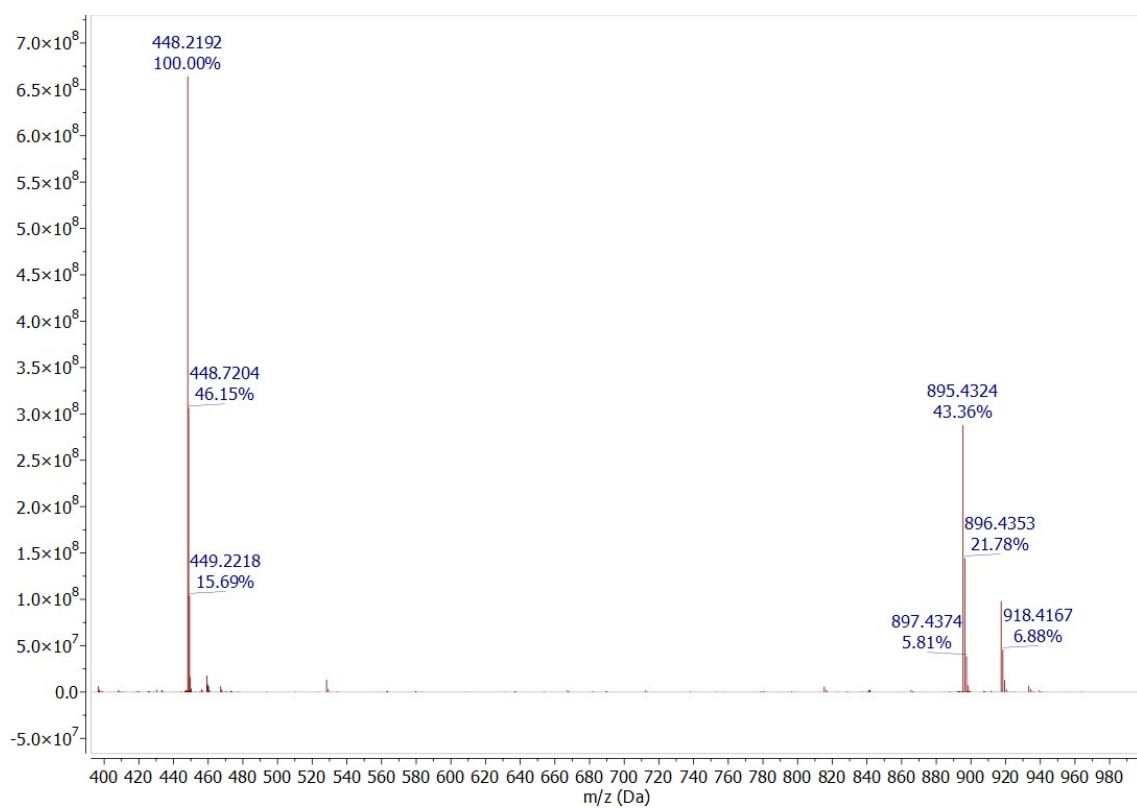

**Figure S28:** Experimental high resolution mass spectrum ( $\text{ESI}^+$ ) of compound  $\text{H}_4\text{CHX-PYTAMGly}$

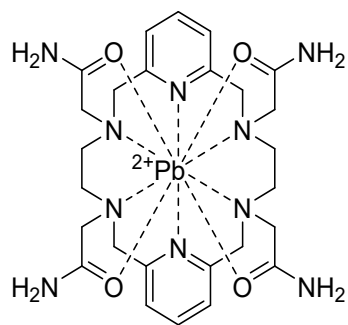

**Scheme S5:** Structure of  $[\text{Pb}(\text{PYTAM})]^{2+}$

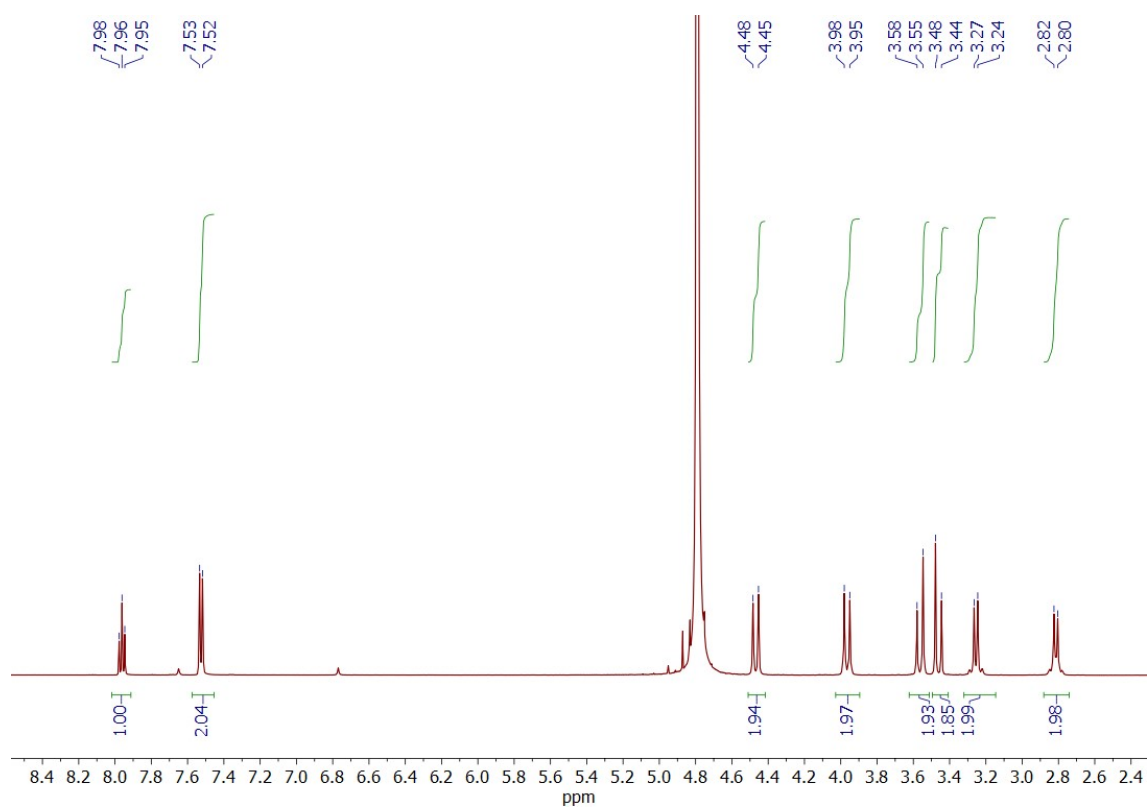

**Figure S29:**  $^1\text{H}$  NMR spectrum of complex  $[\text{Pb}(\text{PYTAM})]^{2+}$  (500 MHz,  $\text{D}_2\text{O}$ ,  $\text{pD} = 6.5$ , 298 K).



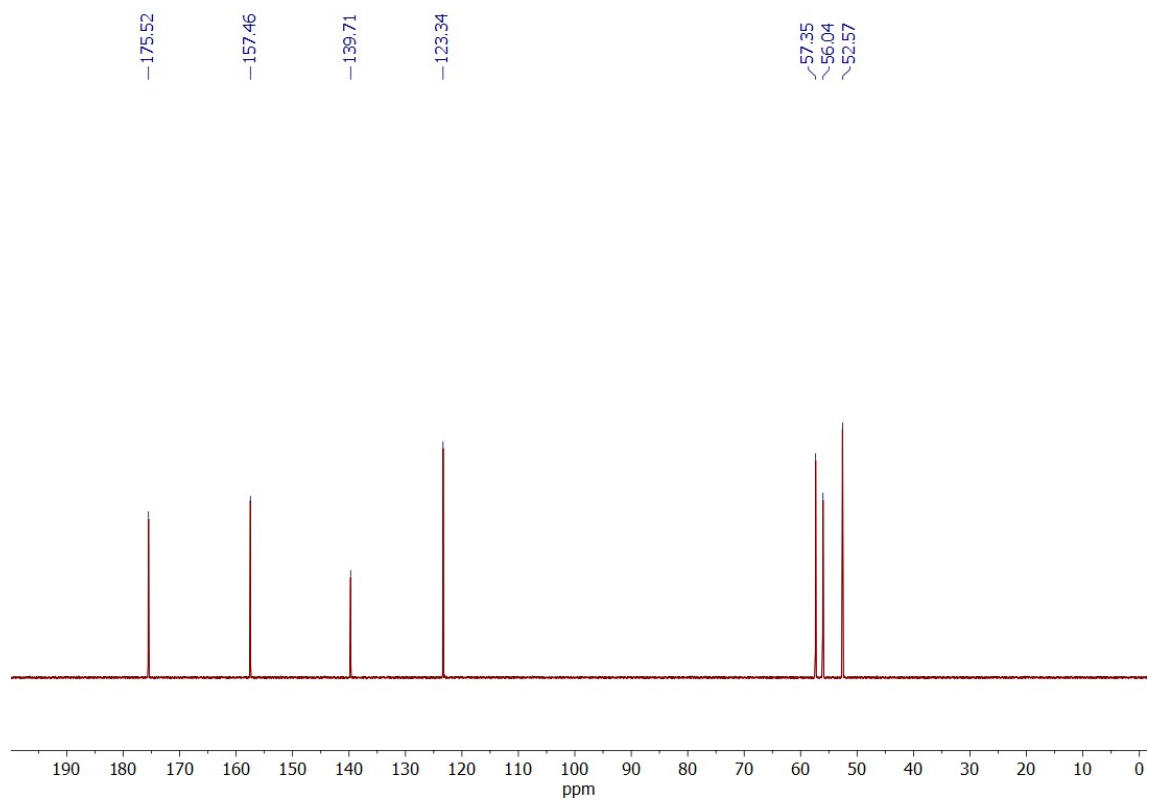

**Figure S30:**  $^{13}\text{C}$  NMR spectrum of complex  $[\text{Pb}(\text{PYTAM})]^{2+}$  (126 MHz,  $\text{D}_2\text{O}$ , pD= 6.5, 298 K).

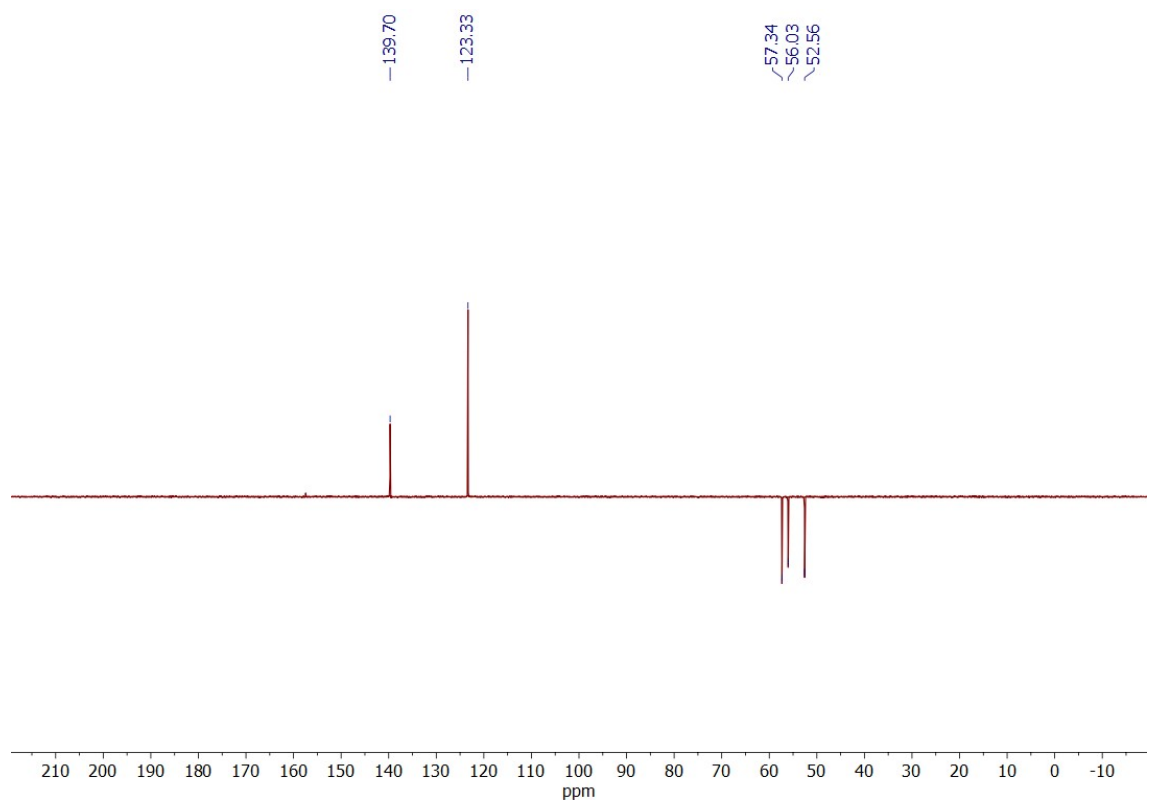

**Figure S31:** DEPT spectrum of complex  $[\text{Pb}(\text{PYTAM})]^{2+}$  (126 MHz,  $\text{D}_2\text{O}$ , pD= 6.5, 298 K).

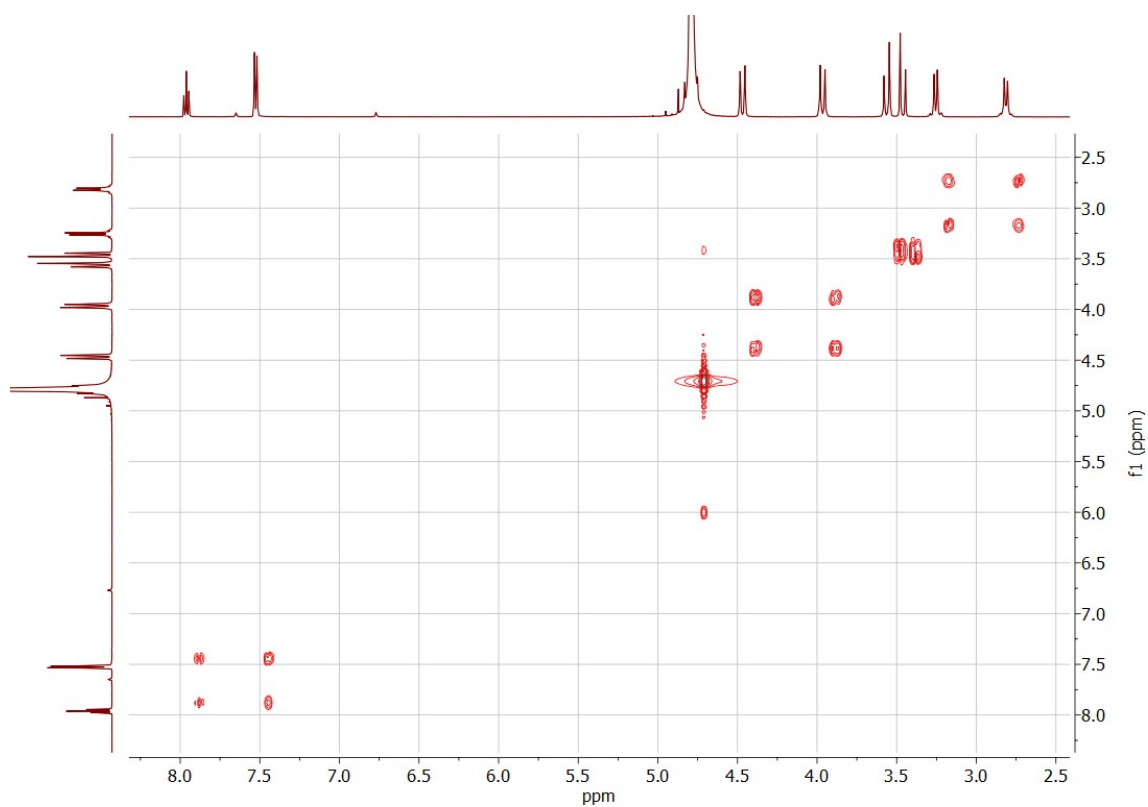

**Figure S32:** COSY NMR spectrum of complex  $[\text{Pb}(\text{PYTAM})]^{2+}$  (500 MHz,  $\text{D}_2\text{O}$ , pD= 6.5, 298 K).

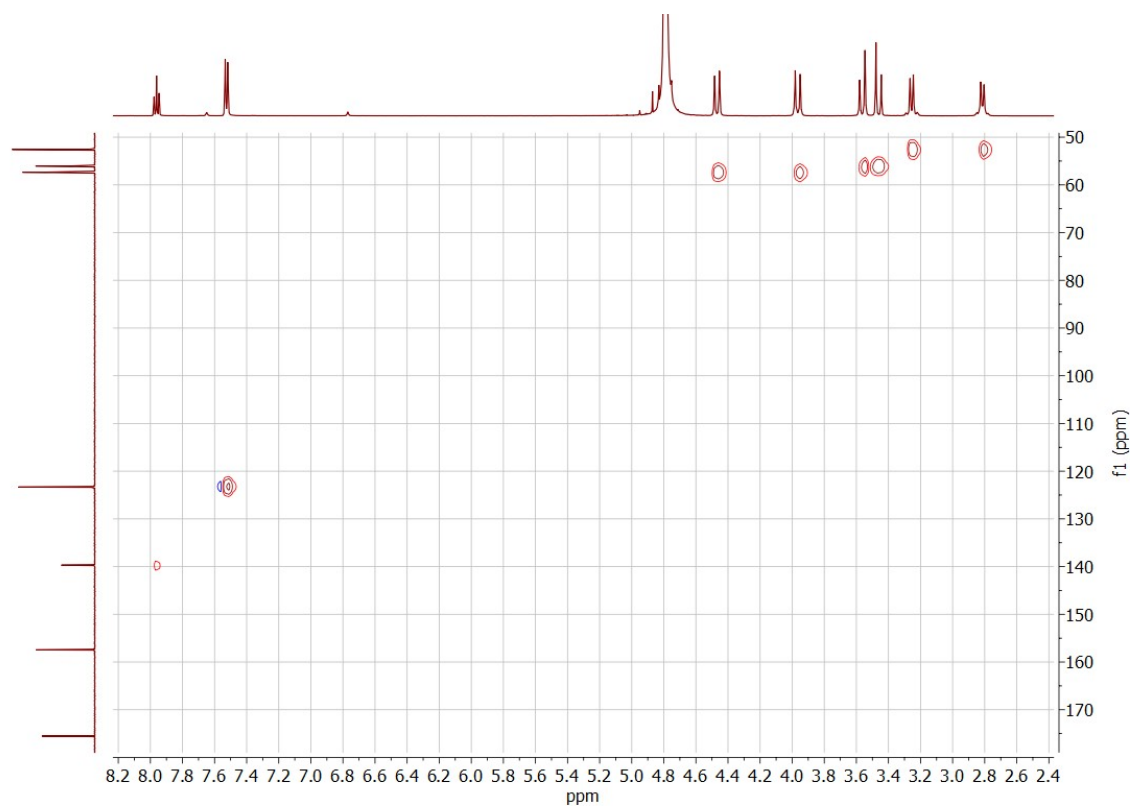

**Figure S33:** HSQC NMR spectrum of complex  $[\text{Pb}(\text{PYTAM})]^{2+}$  ( $\text{D}_2\text{O}$ , pD= 6.5, 298 K).

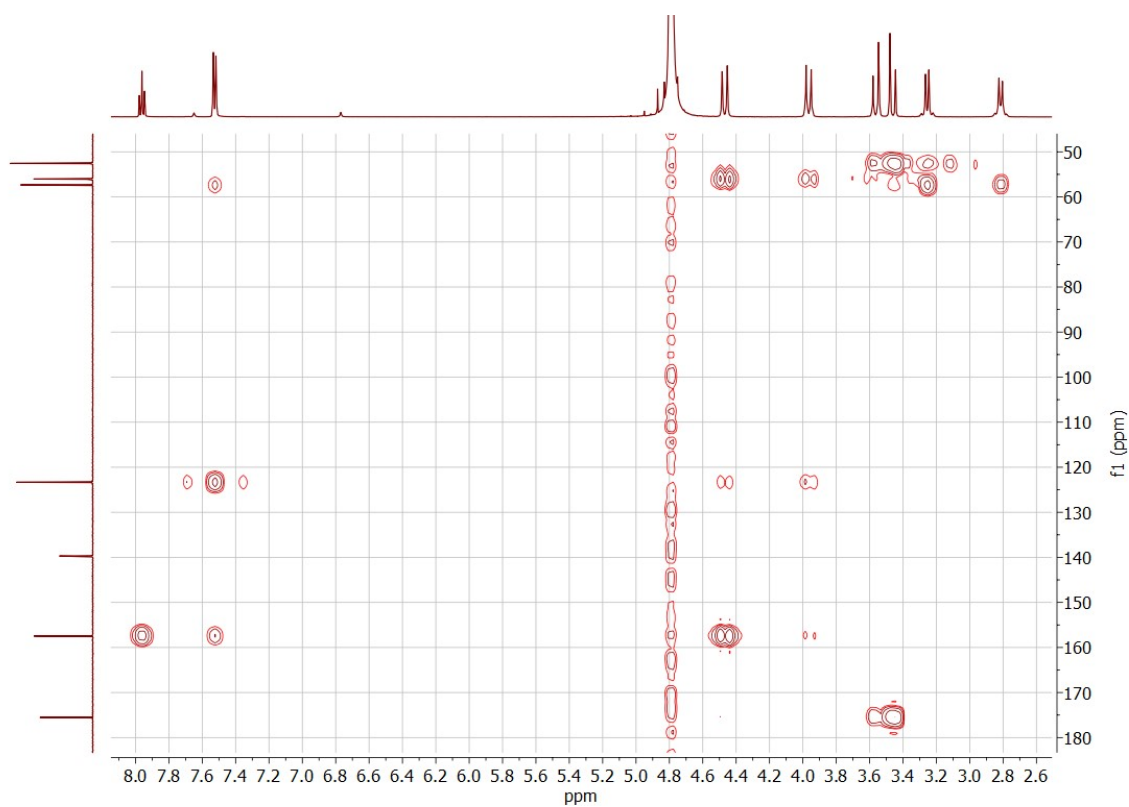

**Figure S34:** HMBC NMR spectrum of complex  $[\text{Pb}(\text{PYTAM})]^{2+}$  ( $\text{D}_2\text{O}$ ,  $\text{pD}= 6.5$ , 298 K).

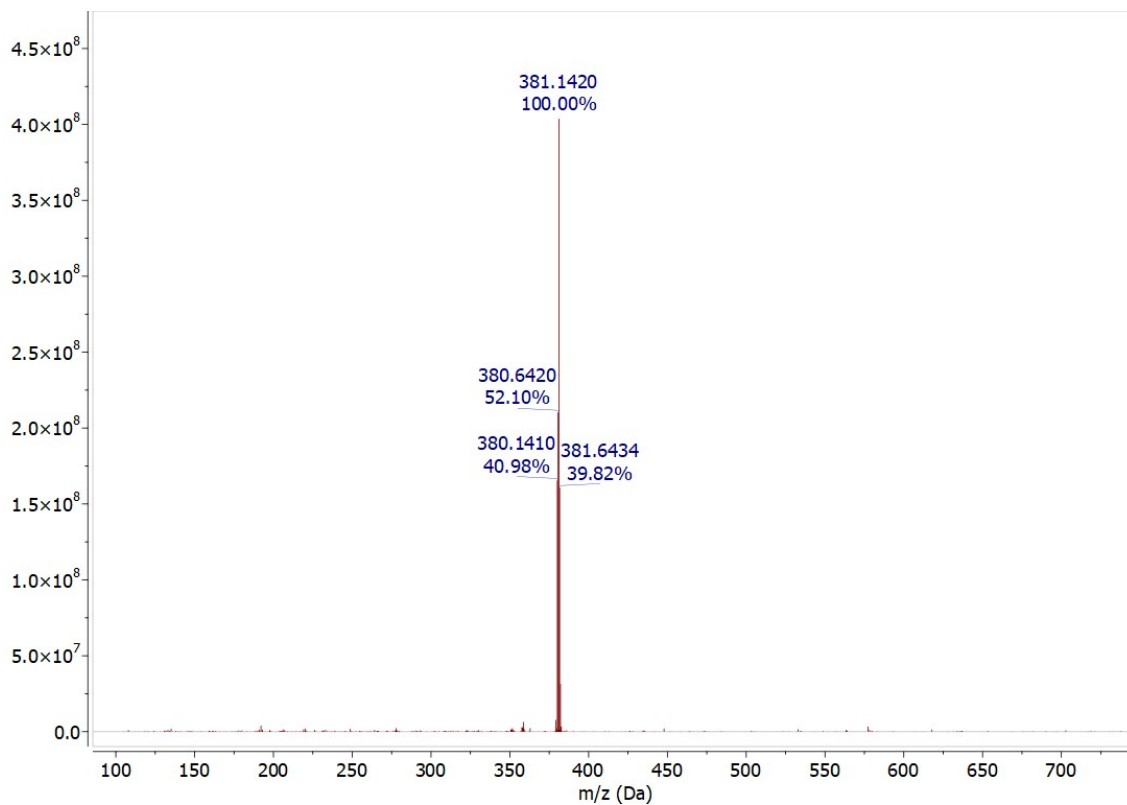

**Figure S35:** Experimental high resolution mass spectrum ( $\text{ESI}^+$ ) of compound  $[\text{Pb}(\text{PYTAM})]^{2+}$

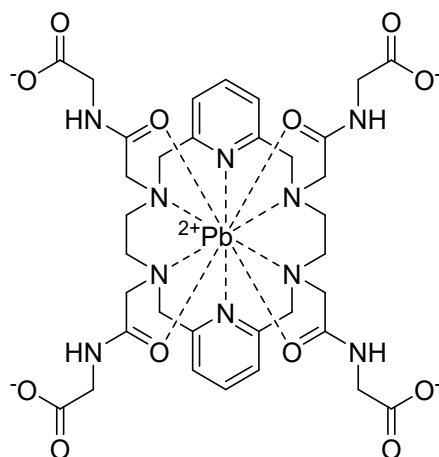

**Scheme S6:** Structure of  $[\text{Pb}(\text{PYTAMGly})]^{2-}$

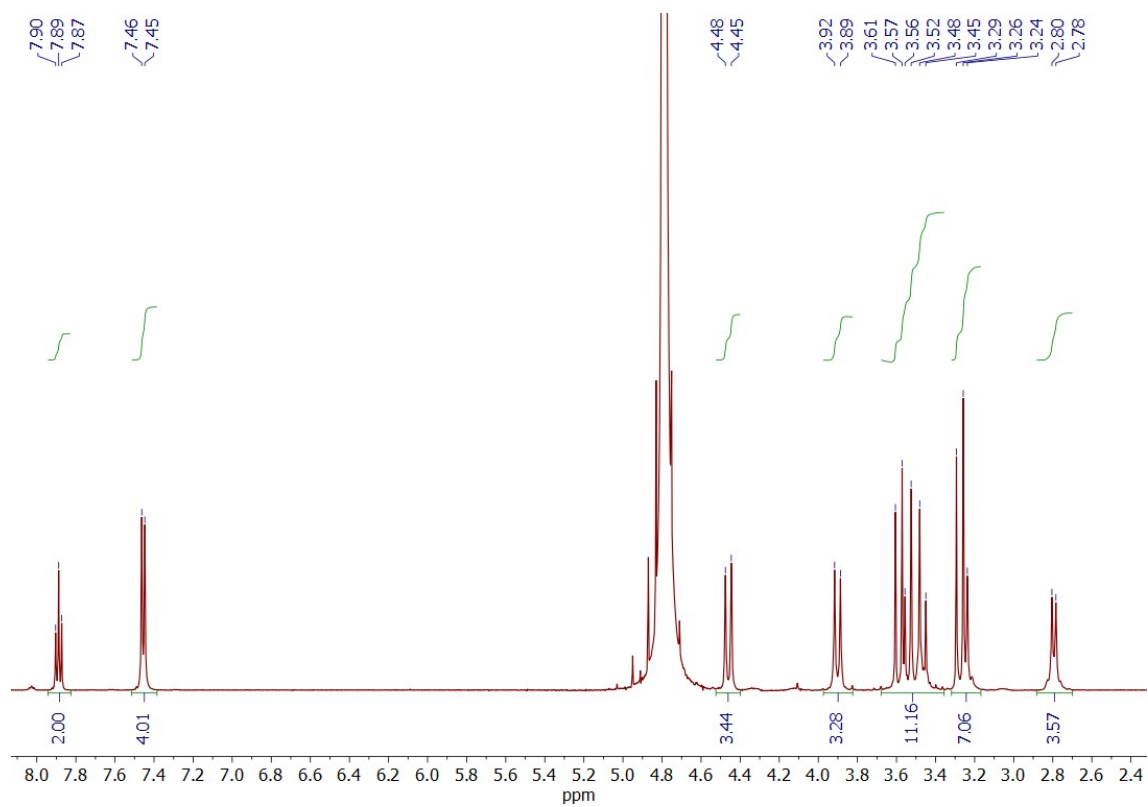

**Figure S36:**  $^1\text{H}$  NMR spectrum of complex  $[\text{Pb}(\text{PYTAMGly})]^{2-}$  (500 MHz,  $\text{D}_2\text{O}$ ,  $\text{pD} = 6.8$ , 298 K).

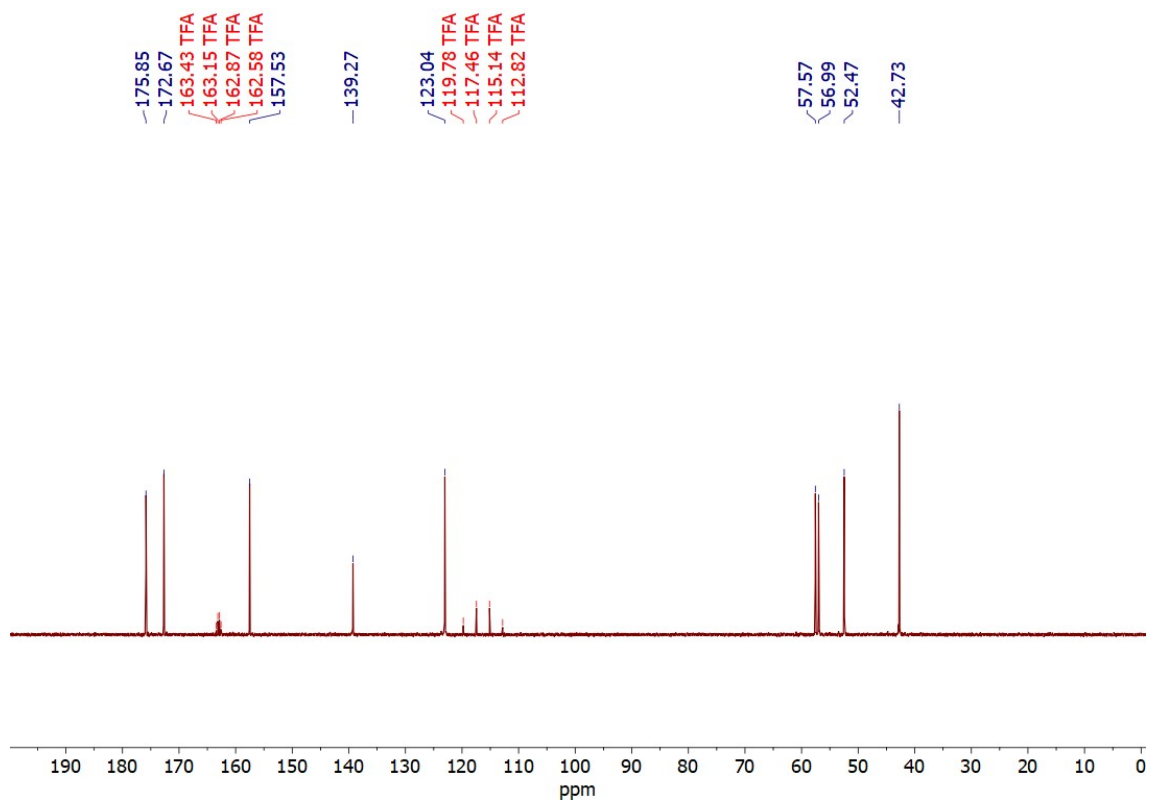

**Figure S37:** <sup>13</sup>C NMR spectrum of complex [Pb(PYTAMGly)]<sup>2-</sup> (126 MHz, D<sub>2</sub>O, pD= 6.8, 298 K).

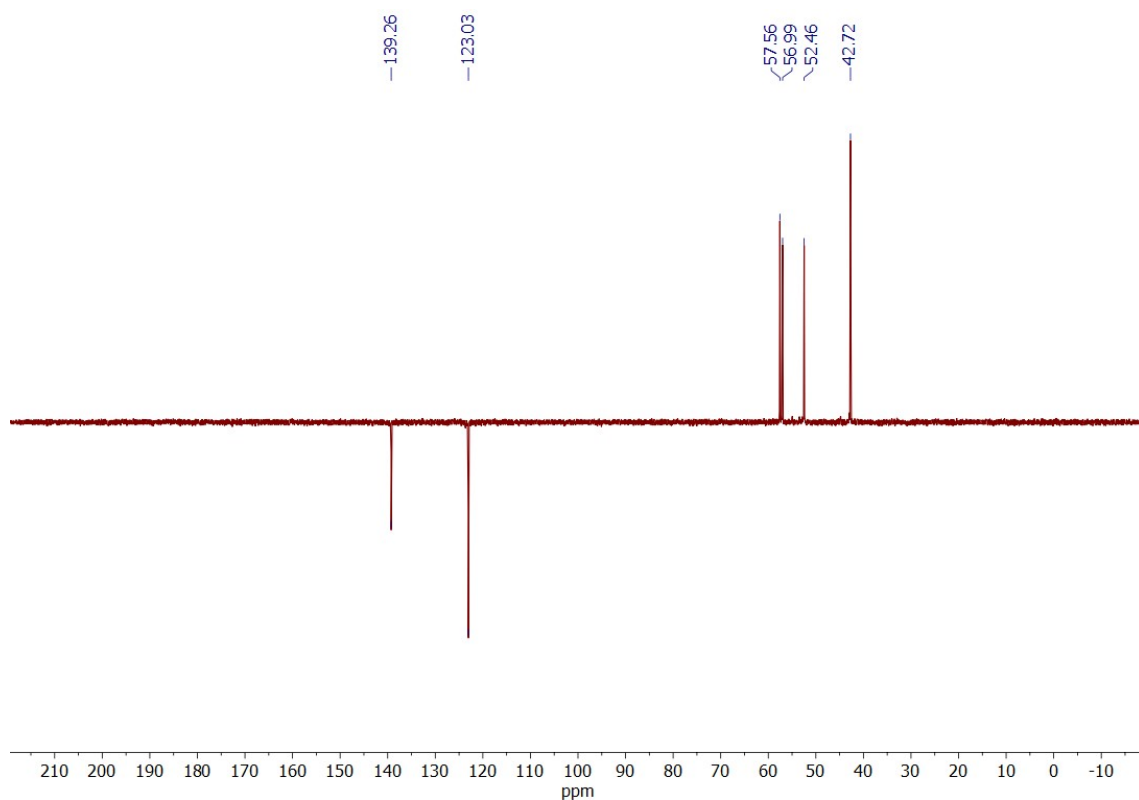

**Figure S38:** DEPT spectrum of complex [Pb(PYTAMGly)]<sup>2-</sup> (126 MHz, D<sub>2</sub>O, pD= 6.8, 298 K).

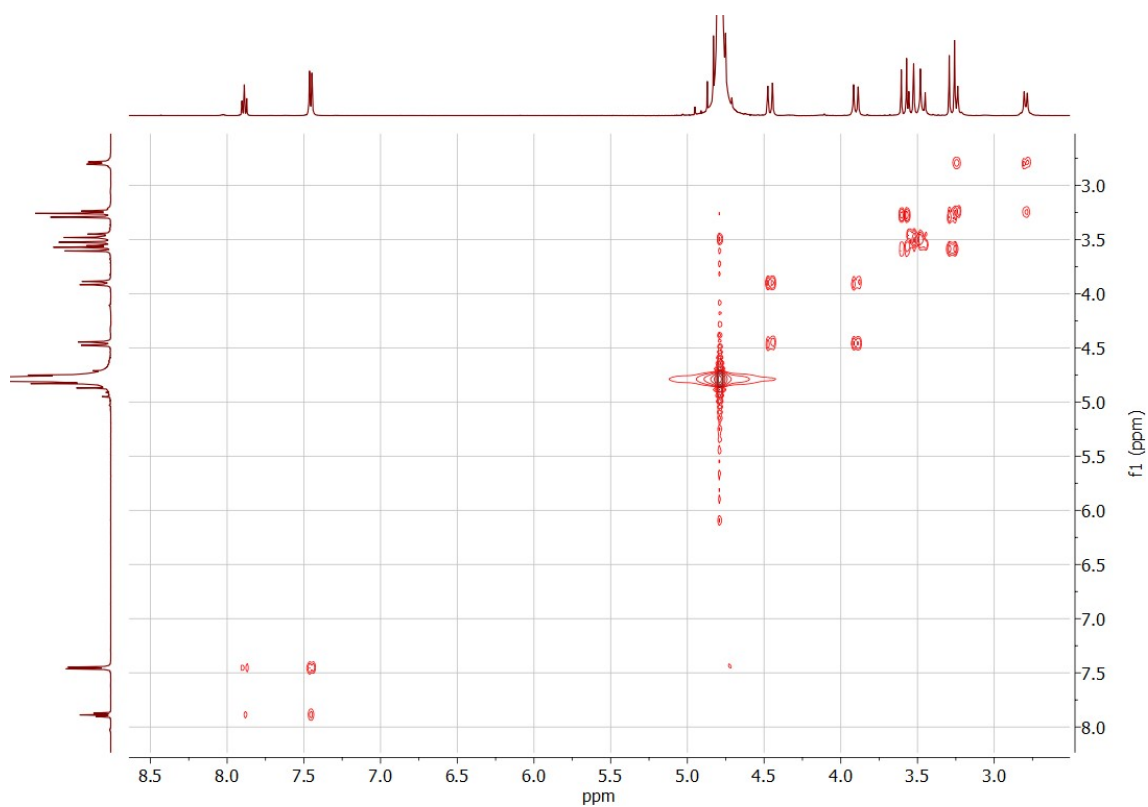

**Figure S39:** COSY NMR spectrum of complex  $[\text{Pb}(\text{PYTAMGly})]^{2-}$  (500 MHz,  $\text{D}_2\text{O}$ , pD= 6.8, 298 K).

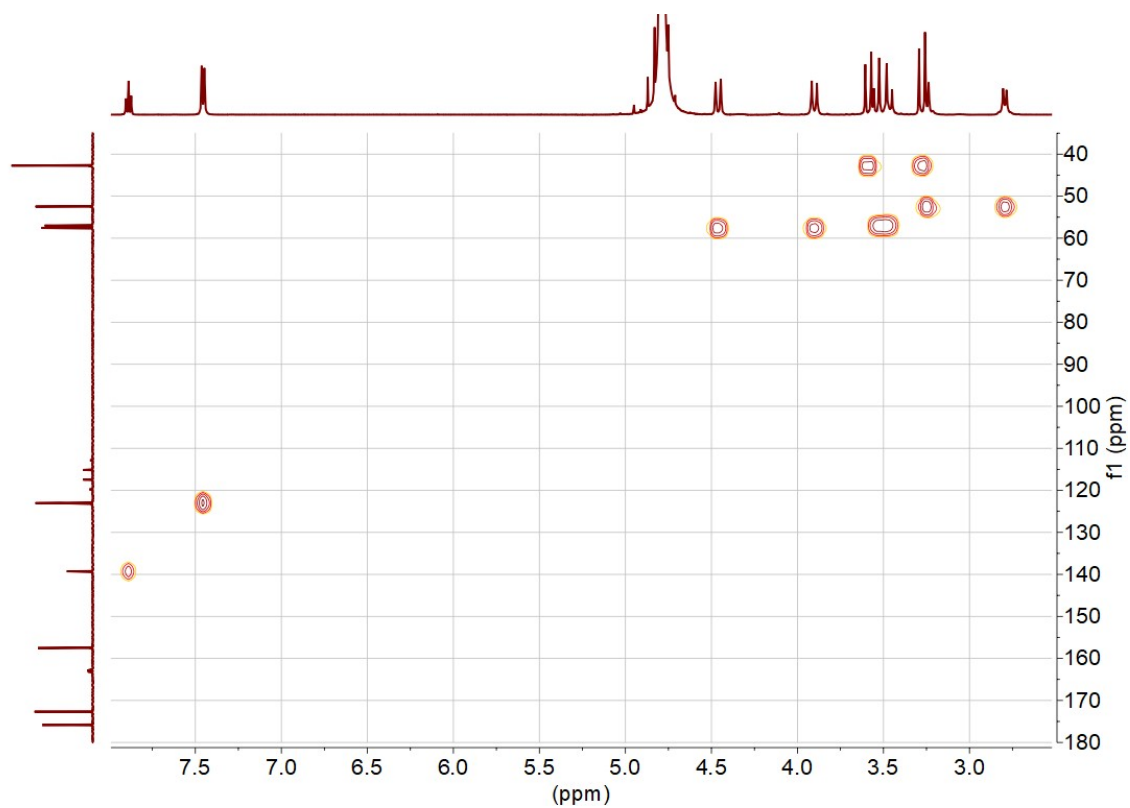

**Figure S40:** HSQC NMR spectrum of complex  $[\text{Pb}(\text{PYTAMGly})]^{2-}$  ( $\text{D}_2\text{O}$ , pD= 6.8, 298 K).

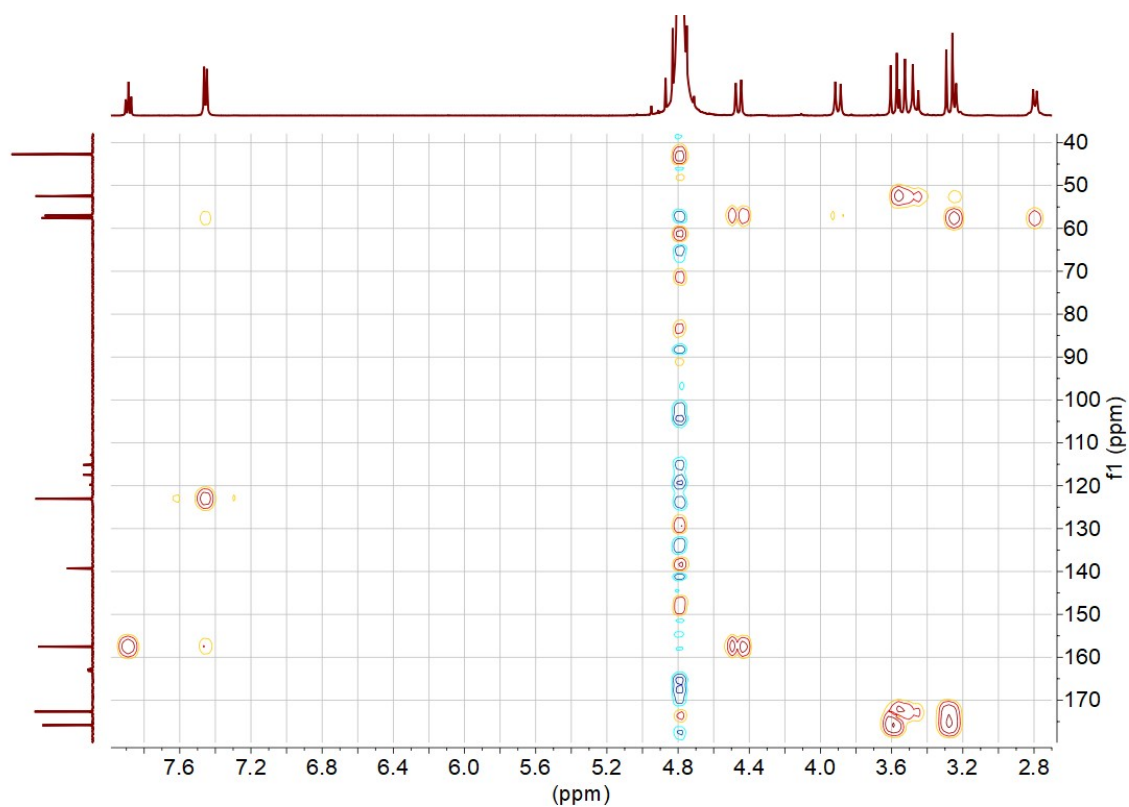

Figure S41: HMBC NMR spectrum of complex  $[\text{Pb}(\text{PYTAMGly})]^{2-}$  ( $\text{D}_2\text{O}$ ,  $\text{pD}= 6.8$ , 298 K).

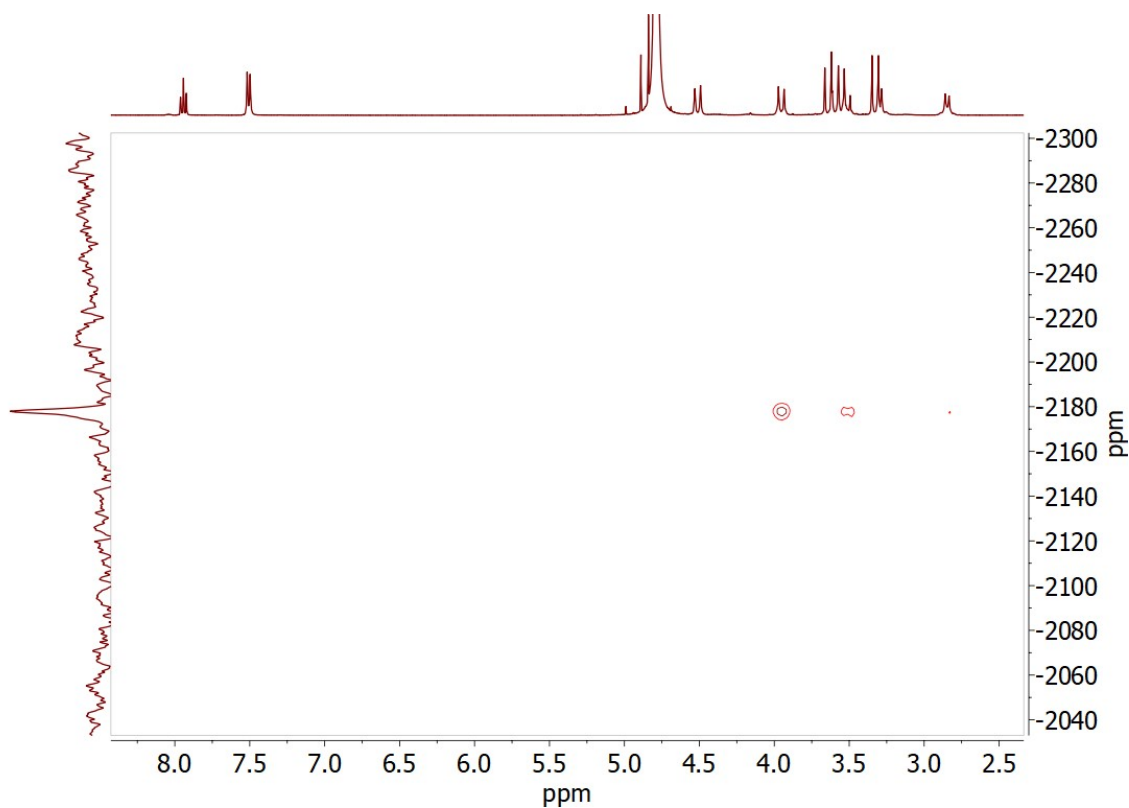

Figure S42: HMQC NMR  $^1\text{H}$ - $^{207}\text{Pb}$  spectrum of complex  $[\text{Pb}(\text{PYTAMGly})]^{2-}$  ( $\text{D}_2\text{O}$ ,  $\text{pD}= 6.8$ , 298 K).

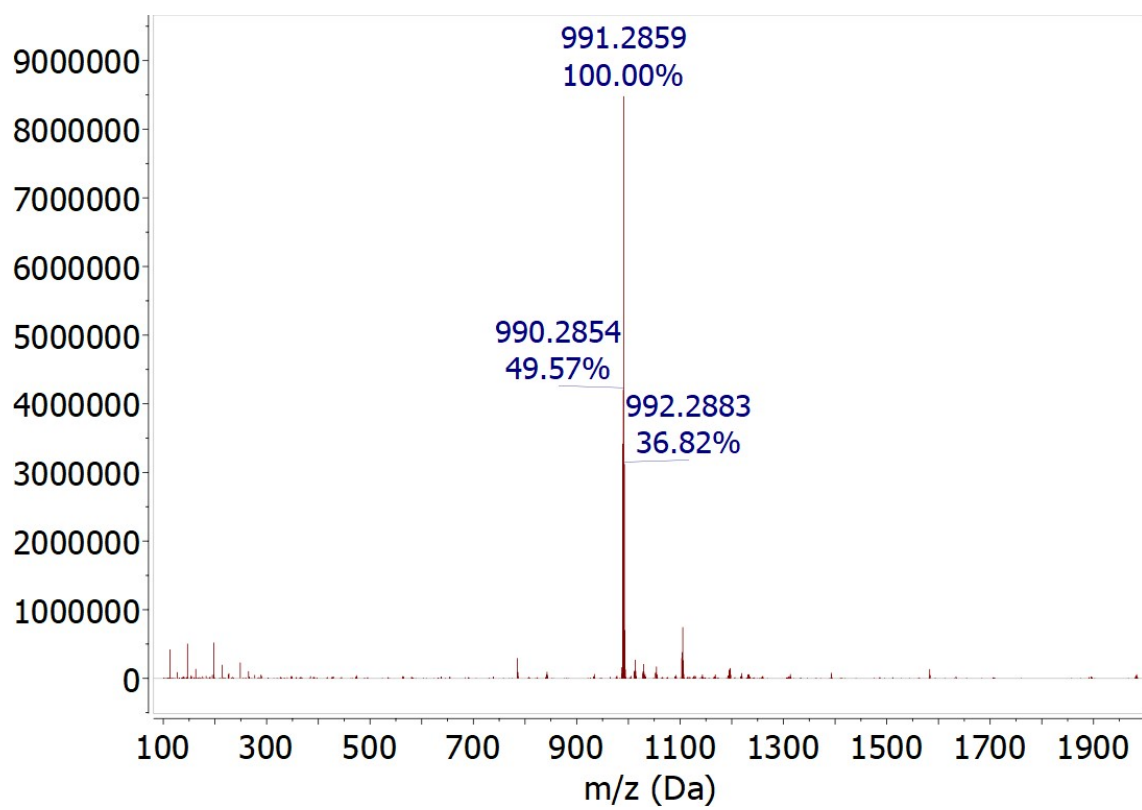

**Figure S43:** Experimental high resolution mass spectrum (ESI) of compound **[Pb(HPYTAMGly)]<sup>-</sup>**



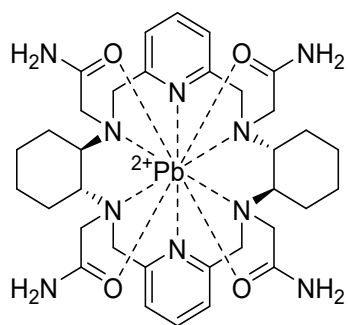

**Scheme S7:** Structure of  $[\text{Pb}(\text{CHX-PYTAM})]^{2+}$

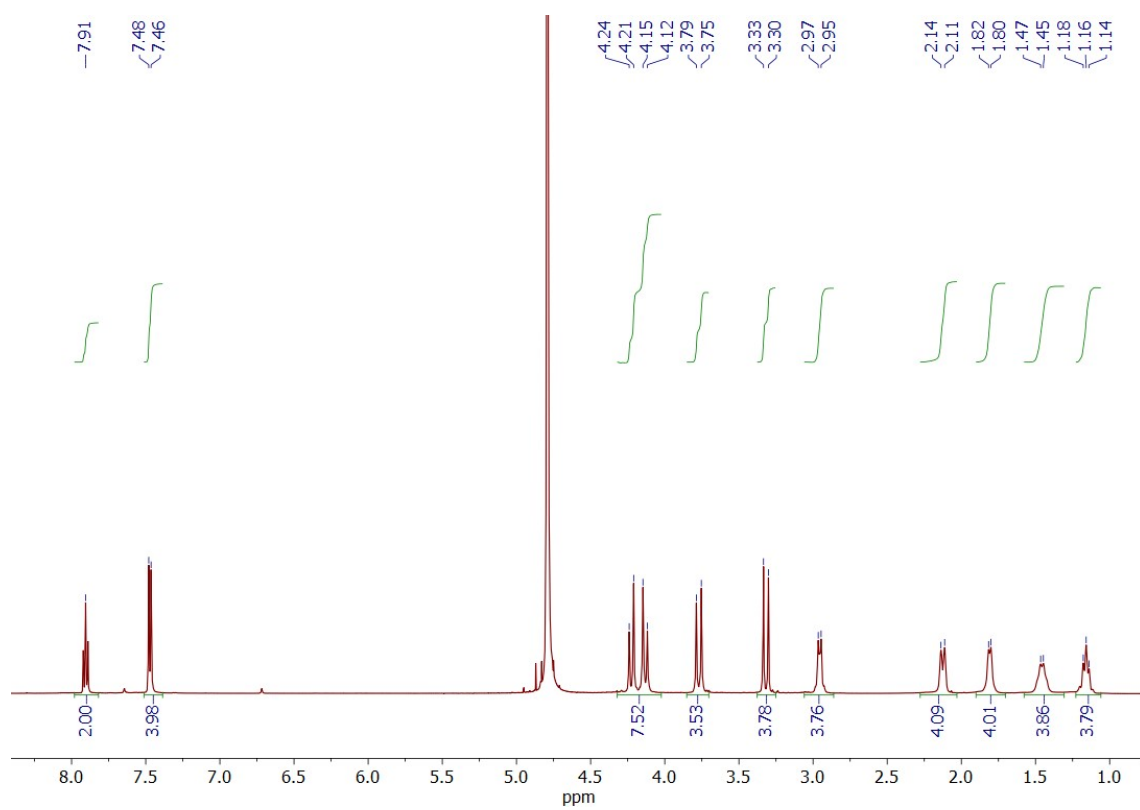

**Figure S44:**  $^1\text{H}$  NMR spectrum of complex  $[\text{Pb}(\text{CHX-PYTAM})]^{2+}$  (500 MHz,  $\text{D}_2\text{O}$ ,  $\text{pD}=7.4$ , 298 K).

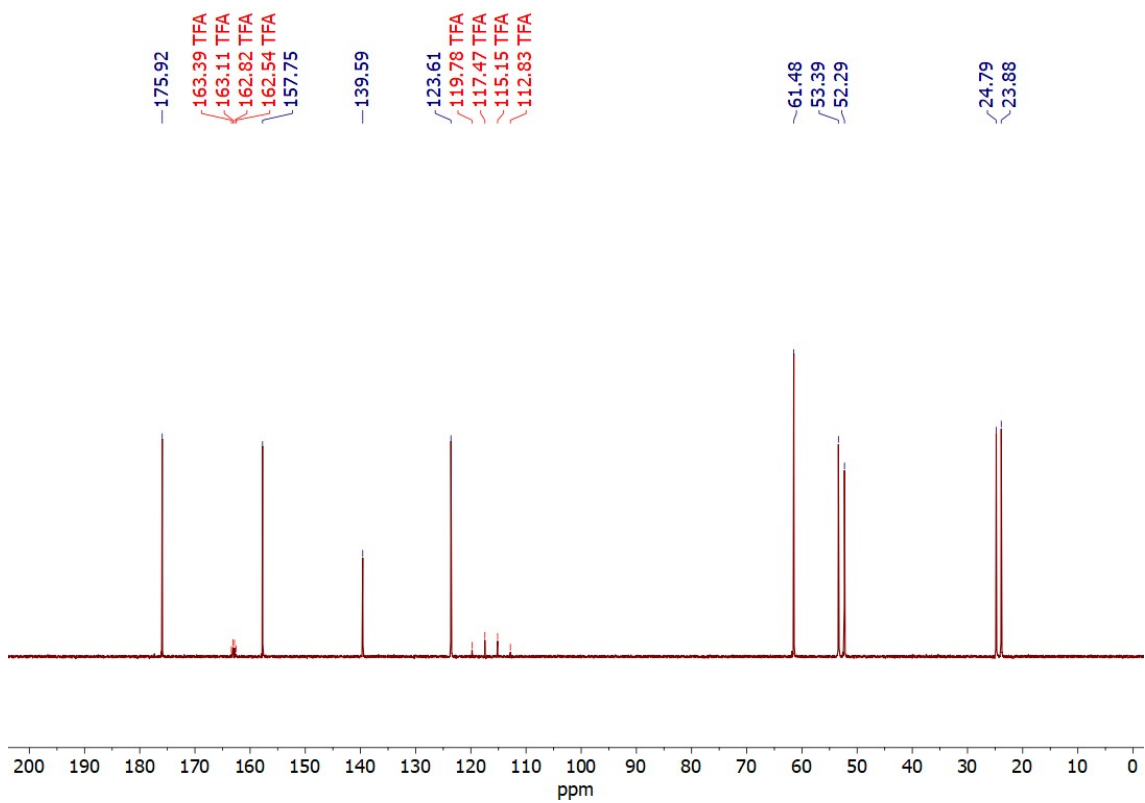

Figure S45:  $^{13}\text{C}$  NMR spectrum of complex  $[\text{Pb}(\text{CHX-PYTAM})]^{2+}$  (126 MHz,  $\text{D}_2\text{O}$ ,  $\text{pD} = 7.4$ , 298 K).

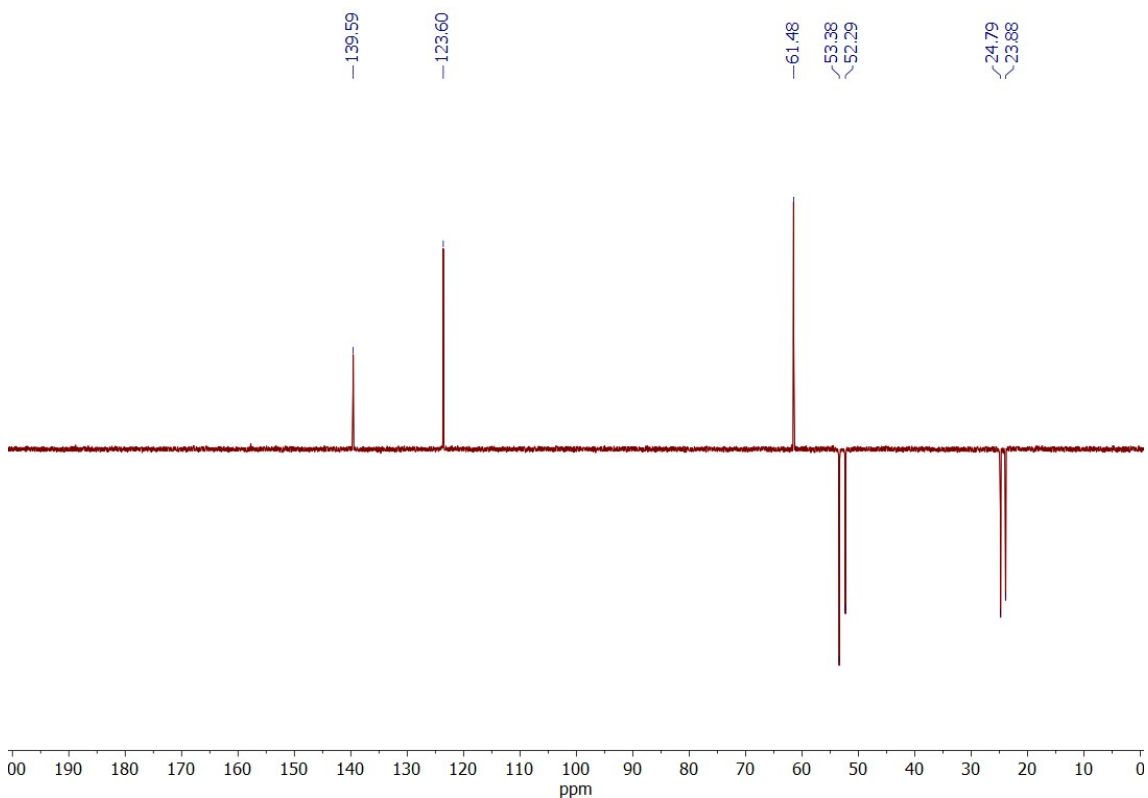

Figure S46: DEPT spectrum of complex  $[\text{Pb}(\text{CHX-PYTAM})]^{2+}$  (126 MHz,  $\text{D}_2\text{O}$ ,  $\text{pD} = 7.4$ , 298 K).

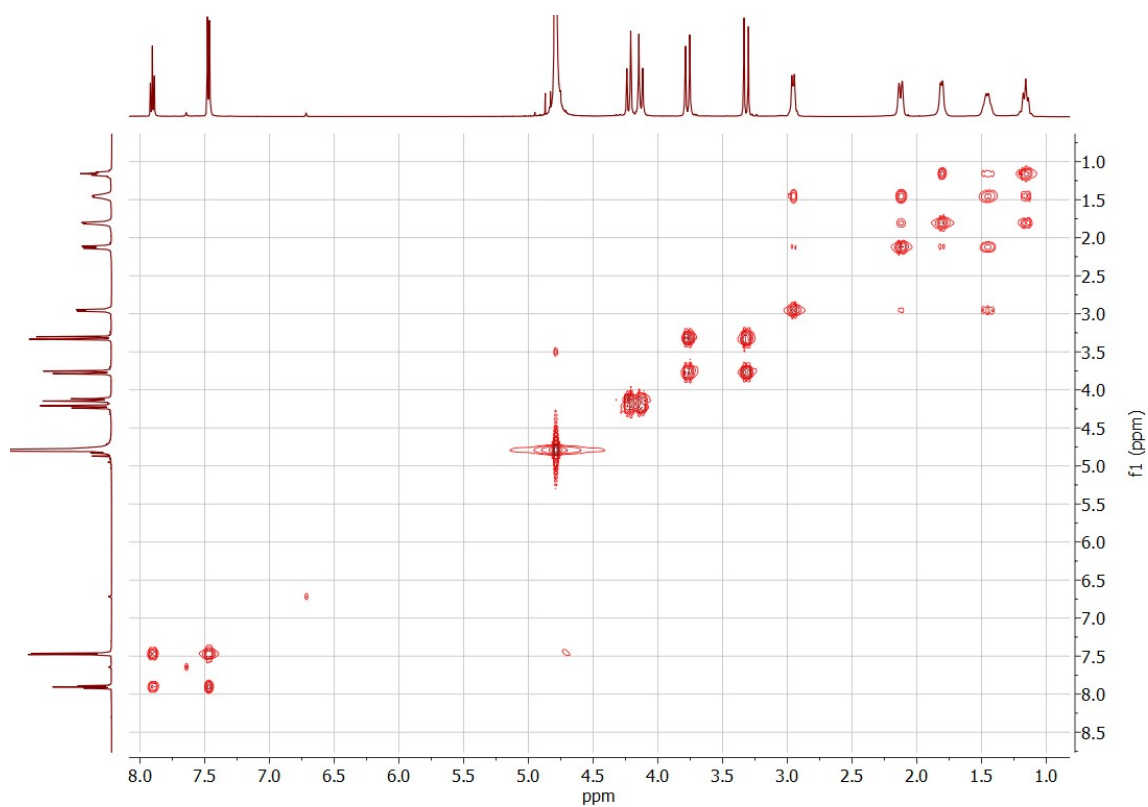

**Figure S47:** COSY NMR spectrum of complex  $[\text{Pb}(\text{CHX-PYTAM})]^{2+}$  (500 MHz,  $\text{D}_2\text{O}$ , pD= 7.4, 298 K).

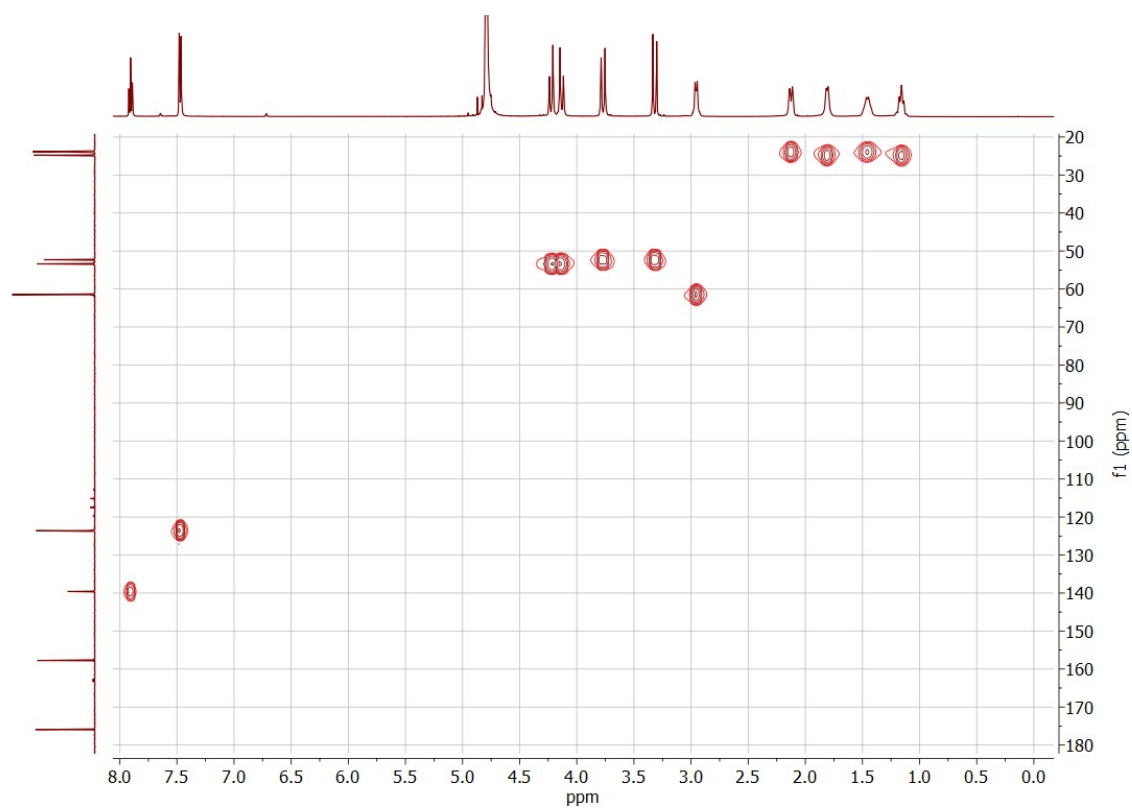

**Figure S48:** HSQC NMR spectrum of complex  $[\text{Pb}(\text{CHX-PYTAM})]^{2+}$  ( $\text{D}_2\text{O}$ , pD= 7.4, 298 K).

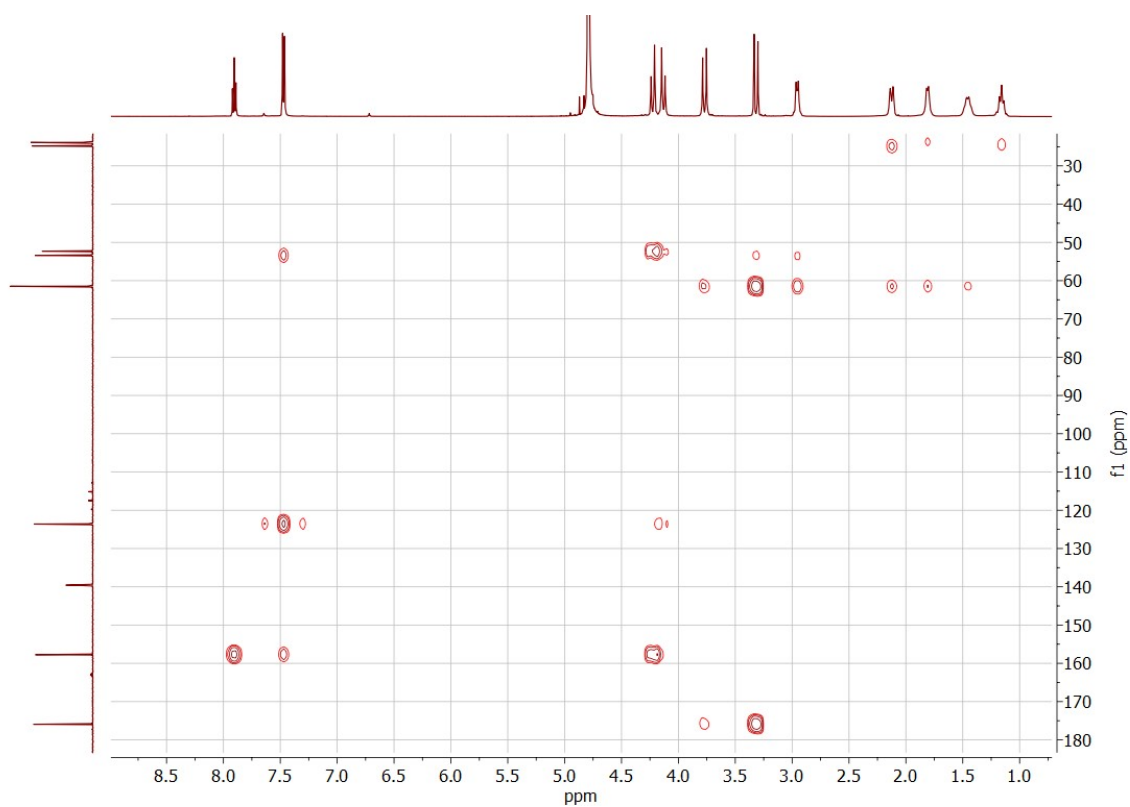

**Figure S49:** HMBC NMR spectrum of complex  $[\text{Pb}(\text{CHX-PYTAM})]^{2+}$  ( $\text{D}_2\text{O}$ ,  $\text{pD}= 7.4$ , 298 K).

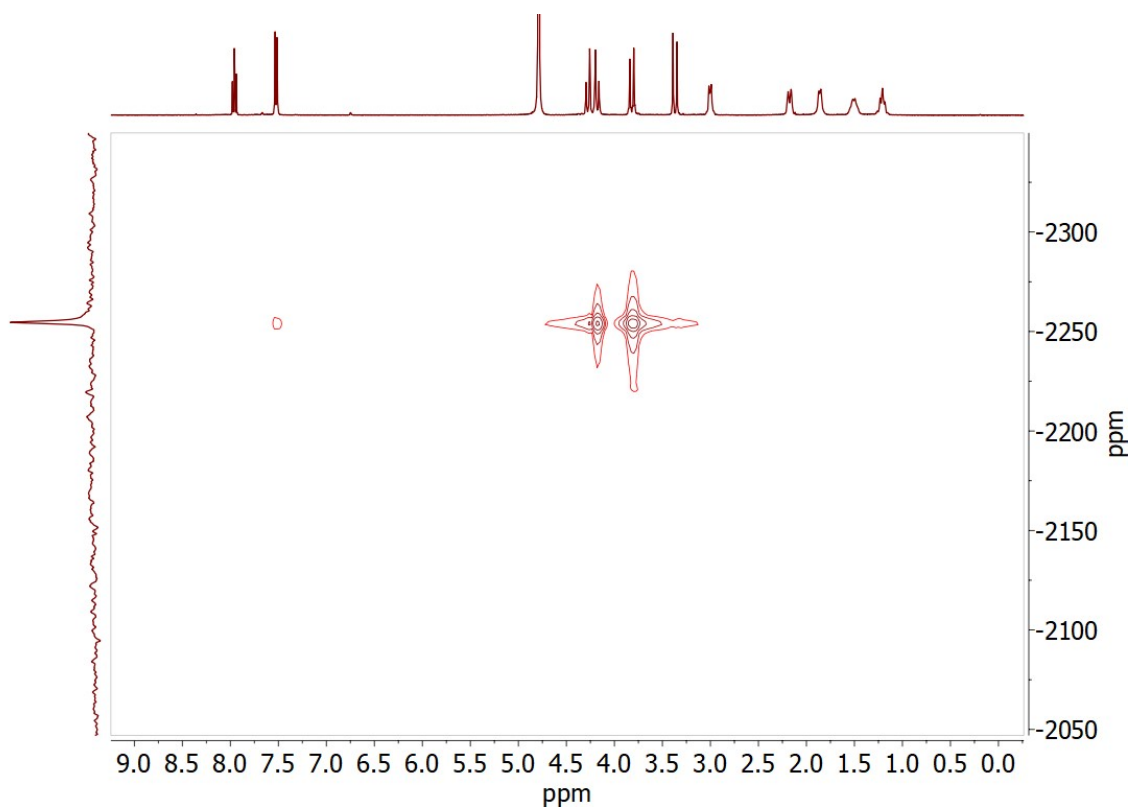

**Figure S50:** HMQC NMR  $^1\text{H}$ - $^{207}\text{Pb}$  spectrum of complex  $[\text{Pb}(\text{CHX-PYTAM})]^{2+}$  ( $\text{D}_2\text{O}$ ,  $\text{pD}= 7.4$ , 298 K).

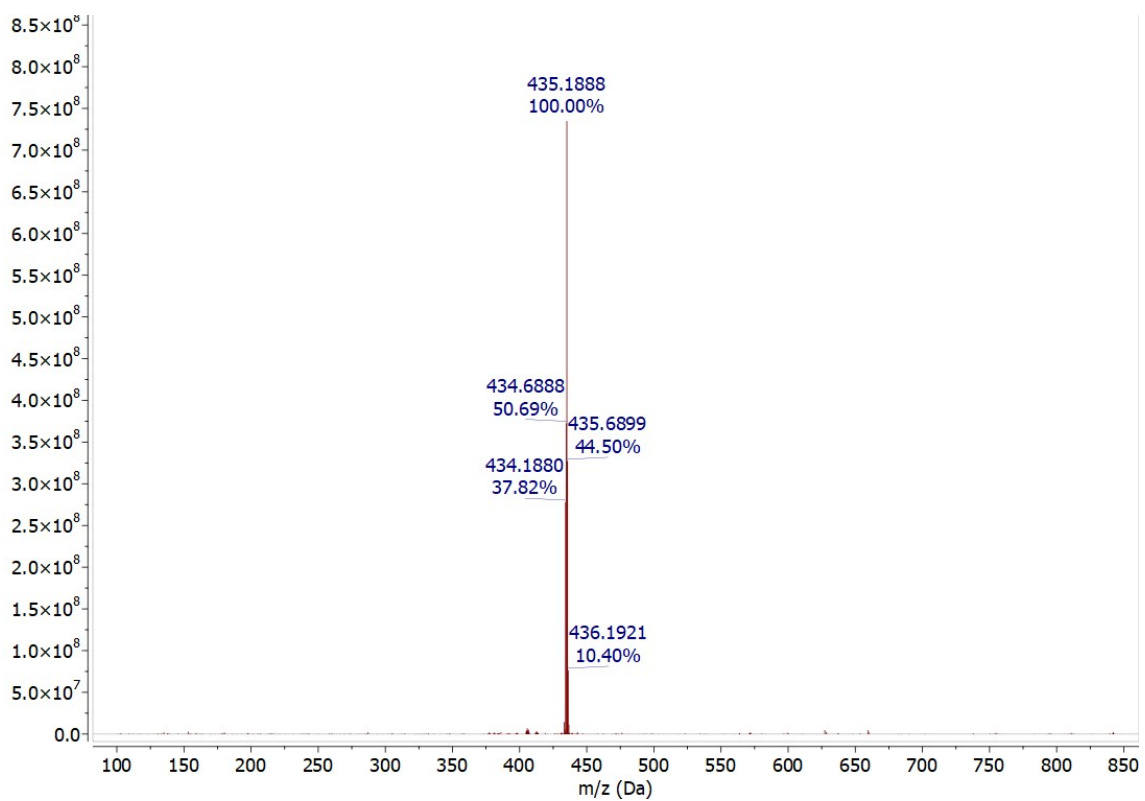

**Figure S51:** Experimental high resolution mass spectrum (ESI<sup>+</sup>) of compound **[Pb(CHX-PYTAM)]<sup>2+</sup>**

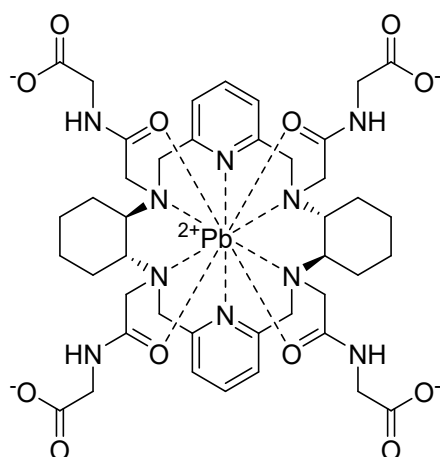

**Scheme S8:** Structure of  $[\text{Pb}(\text{CHX-PYTAMGly})]^{2-}$

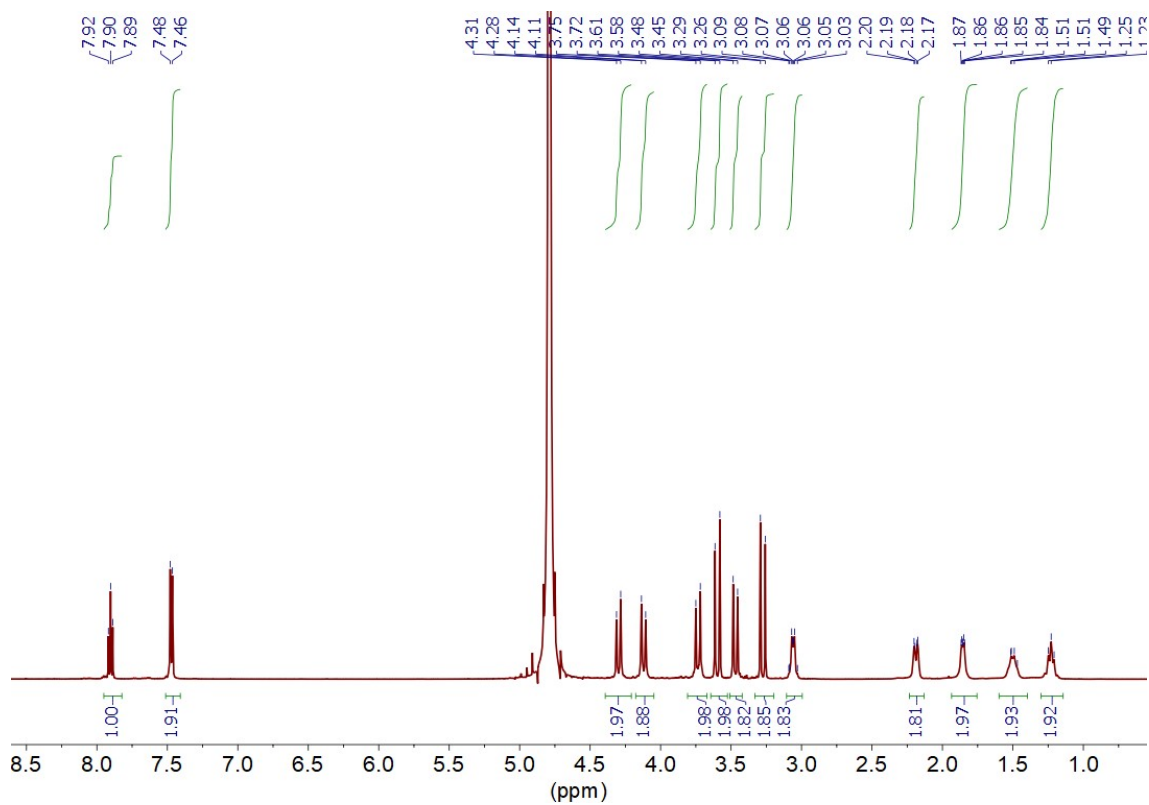

**Figure S52:**  $^1\text{H}$  NMR spectrum of complex  $[\text{Pb}(\text{CHX-PYTAMGly})]^{2-}$  (500 MHz,  $\text{D}_2\text{O}$ , pD= 6.3, 298 K).

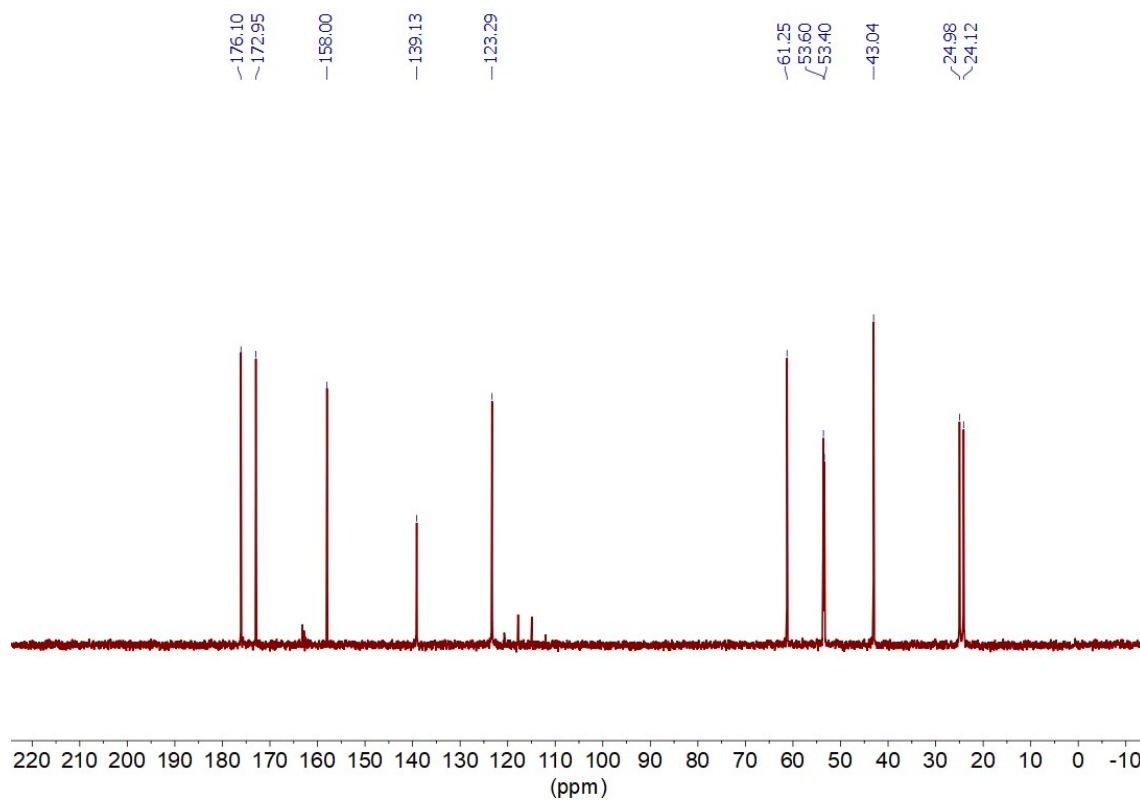

**Figure S53:**  $^{13}\text{C}$  NMR spectrum of complex  $[\text{Pb}(\text{CHX-PYTAMGly})]^{2-}$  (126 MHz,  $\text{D}_2\text{O}$ ,  $\text{pD}= 6.3$ , 298 K).

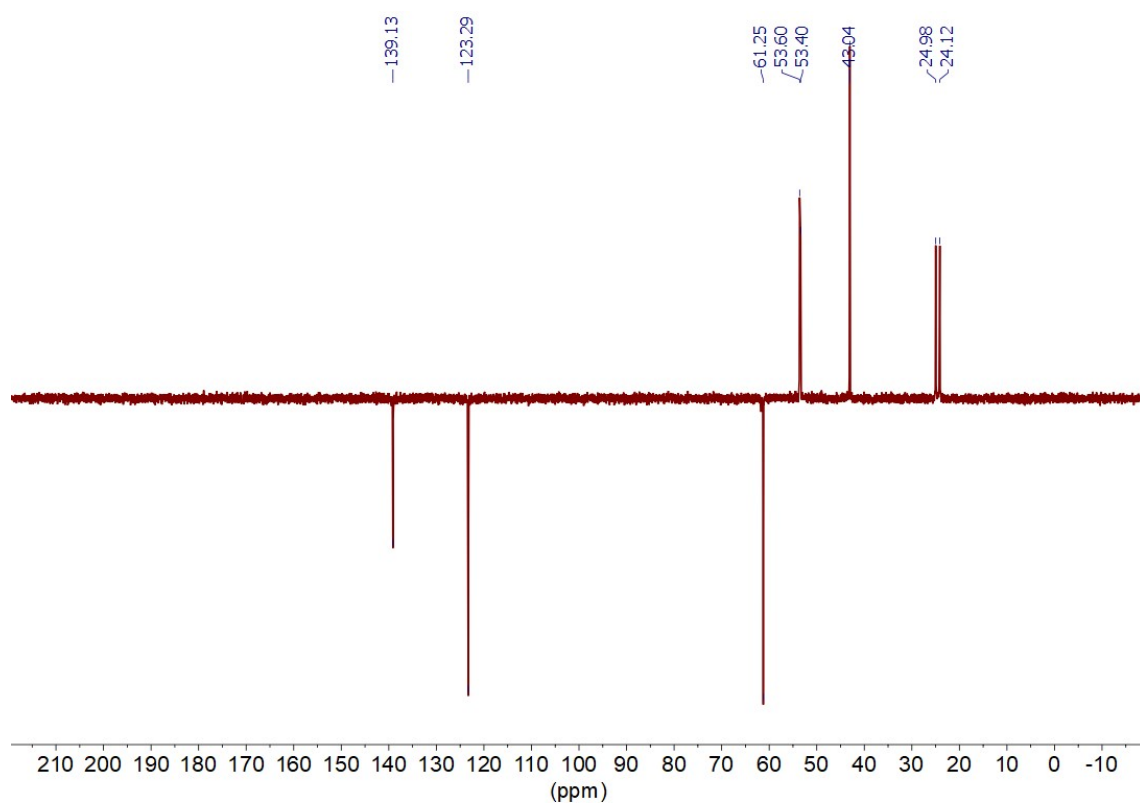

**Figure S54:** DEPT spectrum of complex  $[\text{Pb}(\text{CHX-PYTAMGly})]^{2-}$  (126 MHz,  $\text{D}_2\text{O}$ ,  $\text{pD}= 6.3$ , 298 K).

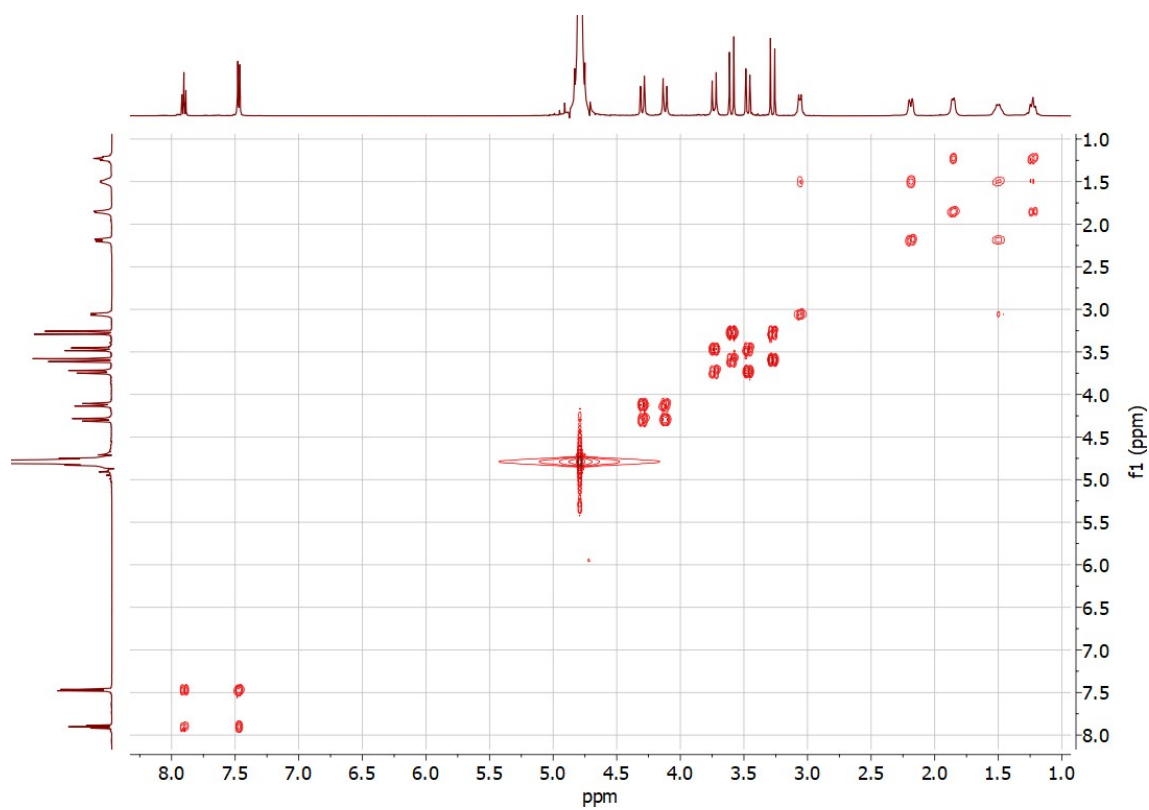

**Figure S55:** COSY NMR spectrum of complex  $[\text{Pb}(\text{CHX-PYTAMGly})]^{2-}$  (500 MHz,  $\text{D}_2\text{O}$ , pD= 6.3, 298 K).

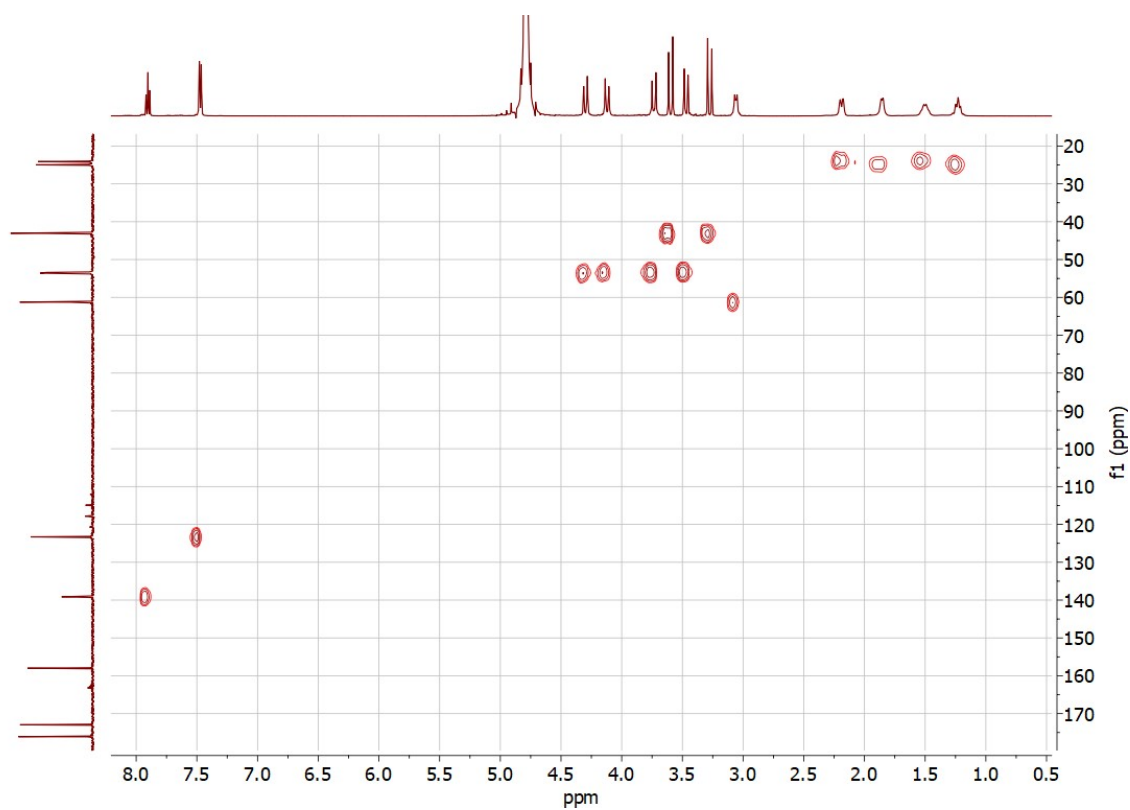

**Figure S56:** HSQC NMR spectrum of complex  $[\text{Pb}(\text{CHX-PYTAMGly})]^{2-}$  ( $\text{D}_2\text{O}$ , pD= 6.3, 298 K).



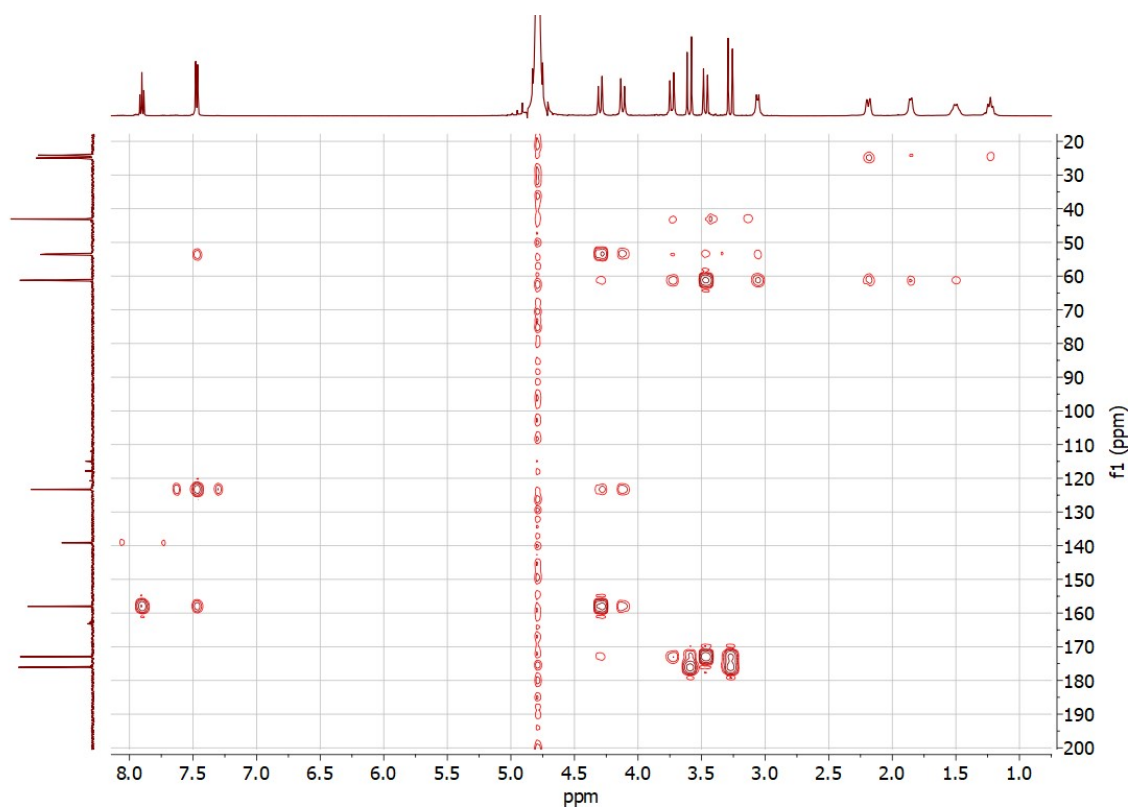

**Figure S57:** HMBC NMR spectrum of complex  $[\text{Pb}(\text{CHX-PYTAMGly})]^{2-}$  ( $\text{D}_2\text{O}$ ,  $\text{pD}= 6.3$ , 298 K).

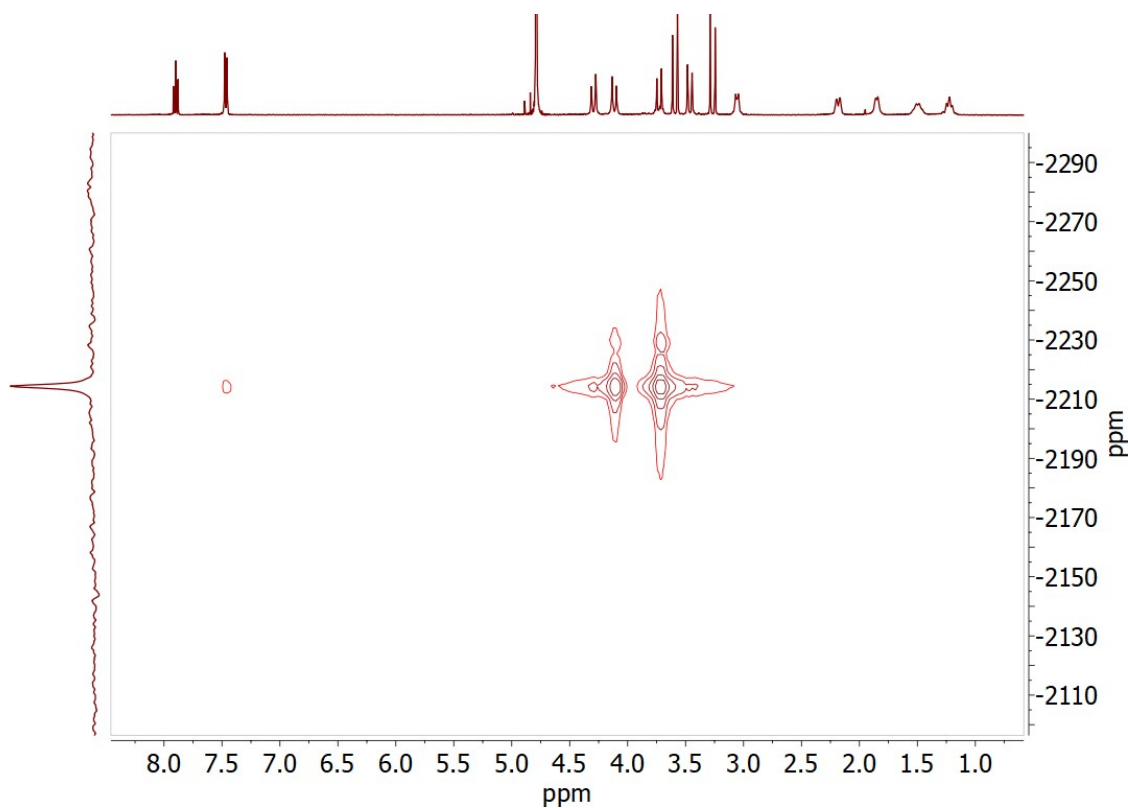

**Figure S58:** HMQC NMR  $^1\text{H}$ - $^{207}\text{Pb}$  spectrum of complex  $[\text{Pb}(\text{CHX-PYTAMGly})]^{2-}$  ( $\text{D}_2\text{O}$ ,  $\text{pD}= 6.3$ , 298 K).

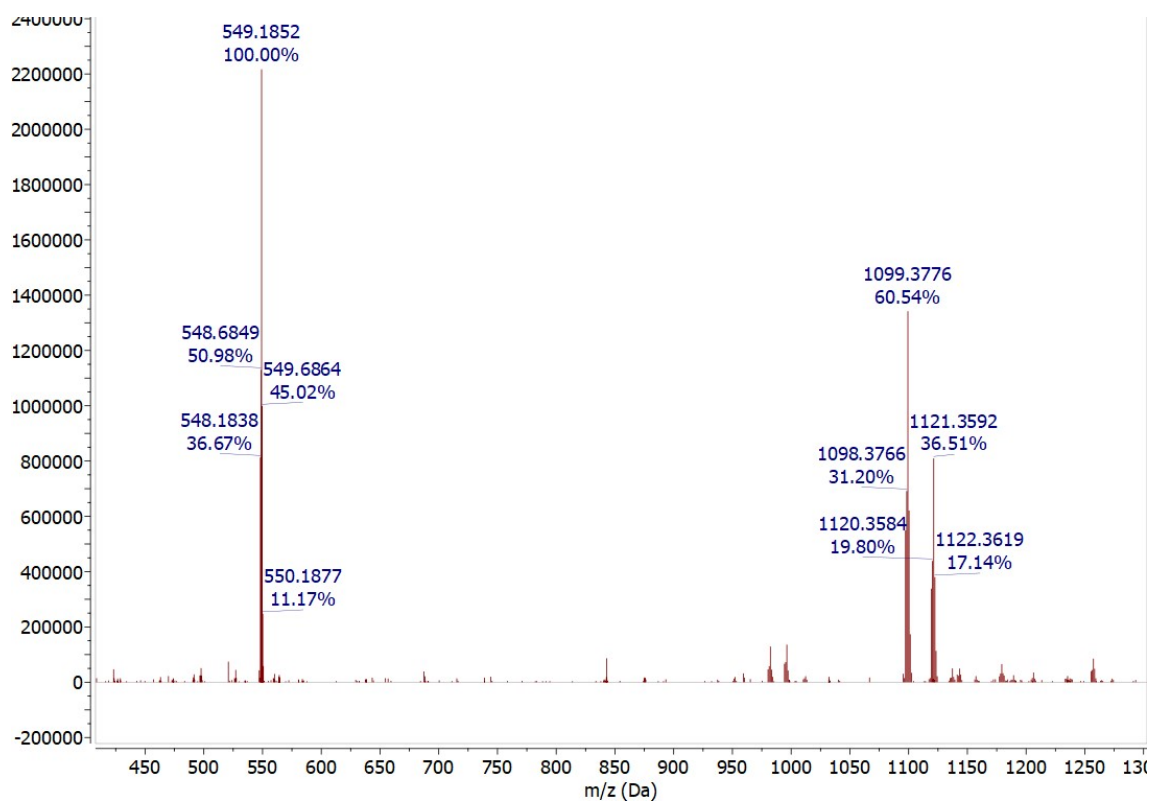

**Figure S59:** Experimental high resolution mass spectrum (ESI) of compound  $[\text{Pb}(\text{CHX-PYTAMGly})]_2$ .

**Table S19:** Crystal Data and Structure Refinement Details for **[Pb(PYTAM)](PF<sub>6</sub>)<sub>2</sub>** and **[Pb(H<sub>4</sub>PYTAMGly)](NO<sub>3</sub>)<sub>2</sub>**

|                                               | <b>[Pb(PYTAM)](PF<sub>6</sub>)<sub>2</sub></b>                                                   | <b>[Pb(H<sub>4</sub>PYTAMGly)](NO<sub>3</sub>)<sub>2</sub></b>                              |
|-----------------------------------------------|--------------------------------------------------------------------------------------------------|---------------------------------------------------------------------------------------------|
| Empirical formula                             | C <sub>26</sub> H <sub>38</sub> N <sub>10</sub> O <sub>4</sub> F <sub>12</sub> P <sub>2</sub> Pb | C <sub>34</sub> H <sub>56</sub> Br <sub>0.09</sub> N <sub>11.91</sub> O <sub>22.72</sub> Pb |
| Molecular weight MW                           | 1051.79                                                                                          | 1209.79                                                                                     |
| Crystal system                                | Orthorhombic                                                                                     | Monoclinic                                                                                  |
| Space group                                   | Fddd                                                                                             | P2 <sub>1</sub> /c                                                                          |
| a/Å                                           | 13.5776(7)                                                                                       | 22.1973(11)                                                                                 |
| b/Å                                           | 16.3882(9)                                                                                       | 10.1543(5)                                                                                  |
| c/Å                                           | 32.7592(15)                                                                                      | 20.7147(10)                                                                                 |
| β/°                                           |                                                                                                  | 99.397(2)                                                                                   |
| Volume (Å <sup>3</sup> )                      | 7289.3(6)                                                                                        | 4606.4(4)                                                                                   |
| Z                                             | 8                                                                                                | 4                                                                                           |
| ρ <sub>calc</sub> (g/cm <sup>3</sup> )        | 1.917                                                                                            | 1.744                                                                                       |
| μ (mm <sup>-1</sup> )                         | 4.828                                                                                            | 3.841                                                                                       |
| θ range                                       | 2.05° - 28.30°                                                                                   | 1.86-28.303                                                                                 |
| R <sub>int</sub>                              | 0.0402                                                                                           | 0.0349                                                                                      |
| Measured reflections                          | 40984                                                                                            | 107981                                                                                      |
| Independent reflections / unique (I > 2σ (I)) | 2280 / 2125                                                                                      | 11459 / 10652                                                                               |
| Goodness-of-fit on F <sup>2</sup>             | 1.162                                                                                            | 1.051                                                                                       |
| R <sub>1</sub>                                | 0.0342                                                                                           | 0.0231                                                                                      |
| wR <sub>2</sub> (all data)                    | 0.0876                                                                                           | 0.0530                                                                                      |
| Larg. diff. peak and hole (eÅ <sup>-3</sup> ) | 1.26 and -0.97                                                                                   | 1.44 and -0.89                                                                              |

**Table S20:** Cartesian coordinates (Å) of [Pb(PYTAM)]<sup>2+</sup> with optimized hydrogen positions obtained with DFT calculations.

| Center Number | Atomic Number | Coordinates (Angstroms) |           |           |
|---------------|---------------|-------------------------|-----------|-----------|
|               |               | X                       | Y         | Z         |
| 1             | 82            | -0.000000               | 0.000000  | 0.000003  |
| 2             | 8             | 2.362497                | 0.841300  | 1.224204  |
| 3             | 7             | 0.886602                | -1.222600 | 2.276302  |
| 4             | 7             | -0.000000               | -2.645997 | 0.000004  |
| 5             | 7             | 4.346196                | -0.147398 | 1.645405  |
| 6             | 6             | 0.148000                | -3.315894 | 1.165201  |
| 7             | 6             | 3.000593                | -0.140899 | 1.596203  |
| 8             | 6             | 2.331308                | -1.425013 | 2.051808  |
| 9             | 6             | 0.668001                | -0.360401 | 3.449704  |
| 10            | 6             | 0.191397                | -2.512605 | 2.417216  |
| 11            | 6             | 0.135801                | -4.710796 | 1.186507  |
| 12            | 6             | 0.000000                | -5.372501 | 0.000005  |
| 13            | 8             | -2.362497               | -0.841300 | 1.224204  |
| 14            | 7             | -0.886602               | 1.222600  | 2.276302  |
| 15            | 7             | 0.000000                | 2.645997  | 0.000004  |
| 16            | 7             | -4.346196               | 0.147398  | 1.645405  |
| 17            | 6             | -0.148000               | 3.315894  | 1.165201  |
| 18            | 6             | -3.000593               | 0.140899  | 1.596203  |
| 19            | 6             | -2.331308               | 1.425013  | 2.051808  |
| 20            | 6             | -0.668001               | 0.360401  | 3.449704  |
| 21            | 6             | -0.191397               | 2.512605  | 2.417216  |
| 22            | 6             | -0.135801               | 4.710796  | 1.186507  |
| 23            | 6             | -0.000000               | 5.372501  | 0.000005  |
| 24            | 8             | -2.362496               | 0.841300  | -1.224194 |
| 25            | 7             | -0.886603               | -1.222599 | -2.276292 |
| 26            | 7             | -4.346196               | -0.147399 | -1.645394 |
| 27            | 6             | -0.147999               | -3.315895 | -1.165191 |
| 28            | 6             | -3.000593               | -0.140900 | -1.596194 |
| 29            | 6             | -2.331308               | -1.425013 | -2.051798 |
| 30            | 6             | -0.668001               | -0.360401 | -3.449694 |
| 31            | 6             | -0.191397               | -2.512603 | -2.417304 |
| 32            | 6             | -0.135800               | -4.710797 | -1.186497 |
| 33            | 8             | 2.362496                | -0.841300 | -1.224194 |
| 34            | 7             | 0.886603                | 1.222599  | -2.276292 |
| 35            | 7             | 4.346196                | 0.147399  | -1.645394 |
| 36            | 6             | 0.147999                | 3.315895  | -1.165191 |
| 37            | 6             | 3.000593                | 0.140900  | -1.596194 |
| 38            | 6             | 2.331308                | 1.425013  | -2.051798 |
| 39            | 6             | 0.668001                | 0.360401  | -3.449694 |
| 40            | 6             | 0.191397                | 2.512603  | -2.417304 |
| 41            | 6             | 0.135800                | 4.710797  | -1.186497 |
| 42            | 1             | 0.247323                | 5.245783  | -2.121049 |
| 43            | 1             | 4.859878                | -0.658882 | -1.326013 |
| 44            | 1             | 4.865178                | -0.942975 | 1.980014  |
| 45            | 1             | 1.474392                | -0.371443 | -3.474562 |
| 46            | 1             | 0.741743                | 0.942206  | -4.379373 |
| 47            | 1             | -0.839352               | 2.290714  | -2.705707 |
| 48            | 1             | 0.630650                | 3.114397  | -3.224911 |
| 49            | 1             | 2.459774                | 2.162225  | -1.255466 |
| 50            | 1             | 2.837104                | 1.812821  | -2.946623 |
| 51            | 1             | 4.865182                | 0.943013  | -1.979911 |
| 52            | 1             | -0.247323               | -5.245783 | -2.121049 |
| 53            | 1             | -4.859878               | 0.658882  | -1.326013 |
| 54            | 1             | 0.839352                | -2.290714 | -2.705707 |
| 55            | 1             | -0.630650               | -3.114397 | -3.224911 |
| 56            | 1             | -1.474392               | 0.371443  | -3.474562 |
| 57            | 1             | -0.741743               | -0.942206 | -4.379373 |
| 58            | 1             | -2.459774               | -2.162225 | -1.255466 |
| 59            | 1             | -2.837104               | -1.812821 | -2.946623 |
| 60            | 1             | -4.865182               | -0.943013 | -1.979911 |

|    |   |           |           |          |
|----|---|-----------|-----------|----------|
| 61 | 1 | -0.000000 | 6.457499  | 0.000006 |
| 62 | 1 | -4.859880 | -0.658884 | 1.326027 |
| 63 | 1 | -0.247328 | 5.245781  | 2.121059 |
| 64 | 1 | 0.839368  | 2.290706  | 2.705608 |
| 65 | 1 | -0.630601 | 3.114393  | 3.224844 |
| 66 | 1 | -1.474412 | -0.371424 | 3.474561 |
| 67 | 1 | -0.741728 | 0.942202  | 4.379386 |
| 68 | 1 | -2.459751 | 2.162151  | 1.255378 |
| 69 | 1 | -2.837100 | 1.812908  | 2.946578 |
| 70 | 1 | -4.865178 | 0.942975  | 1.980014 |
| 71 | 1 | 0.000000  | -6.457499 | 0.000006 |
| 72 | 1 | 4.859880  | 0.658884  | 1.326027 |
| 73 | 1 | 0.247328  | -5.245781 | 2.121059 |
| 74 | 1 | -0.839368 | -2.290706 | 2.705608 |
| 75 | 1 | 0.630601  | -3.114393 | 3.224844 |
| 76 | 1 | 1.474412  | 0.371424  | 3.474561 |
| 77 | 1 | 0.741728  | -0.942202 | 4.379386 |
| 78 | 1 | 2.459751  | -2.162151 | 1.255378 |
| 79 | 1 | 2.837100  | -1.812908 | 2.946578 |

-----

**Table S21:** Cartesian coordinates (Å) of  $[\text{Pb}(\text{H}_4\text{PYTAMGly})]^{2+}$  with optimized hydrogen positions obtained with DFT calculations.

| Center Number | Atomic Number | Coordinates (Angstroms) |           |           |
|---------------|---------------|-------------------------|-----------|-----------|
|               |               | X                       | Y         | Z         |
| 1             | 82            | 0.028922                | -0.036492 | -0.078988 |
| 2             | 6             | 0.005211                | 3.429957  | -0.567099 |
| 3             | 6             | -0.438985               | 4.748177  | -0.426687 |
| 4             | 6             | -0.986827               | 5.132860  | 0.787124  |
| 5             | 6             | -1.043924               | 4.221649  | 1.833343  |
| 6             | 6             | -0.557983               | 2.942138  | 1.630171  |
| 7             | 6             | -0.576363               | 1.891070  | 2.732853  |
| 8             | 6             | -1.082141               | -0.428495 | 3.290259  |
| 9             | 6             | 0.275313                | -1.115888 | 3.279844  |
| 10            | 6             | -0.127692               | -2.977614 | 1.750460  |
| 11            | 6             | -0.063078               | -3.491018 | 0.320370  |
| 12            | 6             | -0.170838               | -4.855879 | 0.051113  |
| 13            | 6             | -0.171910               | -5.282488 | -1.266479 |
| 14            | 6             | -0.073888               | -4.339762 | -2.288566 |
| 15            | 6             | 0.029364                | -2.997712 | -1.951152 |
| 16            | 6             | 0.179878                | -1.940793 | -3.033442 |
| 17            | 6             | -0.153943               | 0.397148  | -3.647294 |
| 18            | 6             | 1.166655                | 1.063960  | -3.293157 |
| 19            | 6             | 0.463000                | 2.944968  | -1.928655 |
| 20            | 6             | -2.615003               | 0.840512  | 1.918917  |
| 21            | 6             | -3.198245               | -0.402694 | 1.253496  |
| 22            | 6             | 2.052824                | -1.936987 | 1.874903  |
| 23            | 6             | 2.800605                | -0.609168 | 1.839864  |
| 24            | 6             | 4.920821                | 0.506816  | 2.242453  |
| 25            | 6             | 4.683688                | 1.288524  | 3.519398  |
| 26            | 6             | -1.976779               | -0.883165 | -2.709821 |
| 27            | 6             | -2.673472               | 0.317888  | -2.101525 |
| 28            | 6             | -4.698484               | 1.552265  | -1.766963 |
| 29            | 6             | -4.121463               | 2.936434  | -1.998124 |
| 30            | 6             | 2.542773                | 1.823176  | -1.455204 |
| 31            | 6             | 3.274427                | 0.493557  | -1.295927 |
| 32            | 6             | 5.455025                | -0.542448 | -0.954824 |
| 33            | 6             | 5.833391                | -1.278982 | -2.225652 |
| 34            | 7             | -0.042061               | 2.560425  | 0.445836  |
| 35            | 7             | -1.210592               | 0.633076  | 2.262965  |
| 36            | 7             | 0.609008                | -1.716372 | 1.968062  |
| 37            | 7             | 0.043855                | -2.591790 | -0.670530 |
| 38            | 7             | -0.525849               | -0.685602 | -2.710455 |
| 39            | 7             | 1.171609                | 1.649551  | -1.930284 |

|     |   |           |           |           |
|-----|---|-----------|-----------|-----------|
| 40  | 7 | -4.520721 | -0.539326 | 1.413077  |
| 41  | 7 | 4.101204  | -0.684569 | 2.158194  |
| 42  | 7 | -3.946801 | 0.512829  | -2.451252 |
| 43  | 7 | 4.598494  | 0.600116  | -1.193115 |
| 44  | 8 | -2.502962 | -1.185997 | 0.609913  |
| 45  | 8 | 2.259177  | 0.451330  | 1.512338  |
| 46  | 8 | 3.813563  | 1.038033  | 4.326799  |
| 47  | 8 | 5.512781  | 2.296808  | 3.629641  |
| 48  | 8 | -2.115245 | 1.060797  | -1.284485 |
| 49  | 8 | -3.664580 | 3.289628  | -3.075556 |
| 50  | 8 | -4.205293 | 3.694464  | -0.938171 |
| 51  | 8 | 2.664171  | -0.588449 | -1.213103 |
| 52  | 8 | 5.428595  | -0.977671 | -3.324793 |
| 53  | 8 | 6.659661  | -2.293921 | -2.060846 |
| 54  | 8 | -6.746127 | -3.437587 | 1.521847  |
| 55  | 6 | -5.265334 | -1.654167 | 0.885777  |
| 56  | 6 | -5.962722 | -2.444503 | 1.950969  |
| 57  | 8 | -5.853214 | -2.212632 | 3.129176  |
| 58  | 1 | -4.562108 | -2.300286 | 0.355345  |
| 59  | 1 | -6.006219 | -1.313675 | 0.154733  |
| 60  | 1 | -6.742724 | -3.508131 | 0.555029  |
| 61  | 1 | 6.911086  | -2.422209 | -1.133609 |
| 62  | 1 | -3.874635 | 4.583019  | -1.155191 |
| 63  | 1 | 5.308715  | 2.786542  | 4.444190  |
| 64  | 1 | 5.033835  | 1.491707  | -1.376915 |
| 65  | 1 | 4.462721  | -1.542461 | 2.547280  |
| 66  | 1 | -4.389297 | -0.052448 | -3.158655 |
| 67  | 1 | -5.000726 | 0.094829  | 2.034923  |
| 68  | 1 | 4.938743  | -1.239747 | -0.293261 |
| 69  | 1 | 6.363642  | -0.205515 | -0.453818 |
| 70  | 1 | 2.510775  | 2.287101  | -0.465891 |
| 71  | 1 | 3.122757  | 2.488030  | -2.112687 |
| 72  | 1 | -4.744282 | 1.347399  | -0.698486 |
| 73  | 1 | -5.717569 | 1.549123  | -2.155338 |
| 74  | 1 | -2.216559 | -1.740791 | -2.075268 |
| 75  | 1 | -2.376114 | -1.091524 | -3.712224 |
| 76  | 1 | 4.694285  | 1.166875  | 1.405272  |
| 77  | 1 | 5.972352  | 0.229576  | 2.178759  |
| 78  | 1 | 2.270745  | -2.455286 | 0.937143  |
| 79  | 1 | 2.432983  | -2.562061 | 2.694801  |
| 80  | 1 | -2.684793 | 1.657026  | 1.196117  |
| 81  | 1 | -3.219674 | 1.118658  | 2.793511  |
| 82  | 1 | -0.435136 | 2.827788  | -2.537817 |
| 83  | 1 | 1.070090  | 3.726460  | -2.406407 |
| 84  | 1 | 1.969144  | 0.330612  | -3.340810 |
| 85  | 1 | 1.385039  | 1.831852  | -4.047499 |
| 86  | 1 | -0.955623 | 1.135891  | -3.634042 |
| 87  | 1 | -0.091958 | 0.019941  | -4.676742 |
| 88  | 1 | 1.241064  | -1.701345 | -3.128446 |
| 89  | 1 | -0.157484 | -2.356129 | -3.991474 |
| 90  | 1 | -0.085867 | -4.641842 | -3.327963 |
| 91  | 1 | -0.252706 | -6.336631 | -1.501049 |
| 92  | 1 | -0.246515 | -5.565208 | 0.865818  |
| 93  | 1 | -1.177219 | -2.788518 | 1.981226  |
| 94  | 1 | 0.223208  | -3.764488 | 2.430886  |
| 95  | 1 | 1.055522  | -0.394666 | 3.518777  |
| 96  | 1 | 0.286380  | -1.877006 | 4.071651  |
| 97  | 1 | -1.865952 | -1.163542 | 3.110043  |
| 98  | 1 | -1.259836 | -0.019287 | 4.293243  |
| 99  | 1 | 0.450388  | 1.654073  | 3.014367  |
| 100 | 1 | -1.096118 | 2.289982  | 3.612284  |
| 101 | 1 | -1.470395 | 4.497788  | 2.789265  |
| 102 | 1 | -1.362151 | 6.140171  | 0.920884  |
| 103 | 1 | -0.378069 | 5.437915  | -1.258948 |

---
